# Supplementary material for: Alkyltin fluorides as alkylating reagent in aminoalkylation of maleimides
Source: Royal Society of Chemistry journal article supplement (doi:10.1039/d3ob00889d), 2023-01-01

# Alkyltin Fluorides as Alkylating Reagent in Aminoalkylation of Maleimides

Jingjing Wang,<sup>a†</sup> Lin Zhao,<sup>a†</sup> Yafei Zhang,<sup>a</sup> Peisen Zheng,<sup>a</sup> Peng Zou,<sup>\*a</sup> and Ge  
Wu,<sup>\*a,b</sup>

<sup>a</sup>School of Pharmaceutical Sciences, Wenzhou Medical University, Wenzhou 325035,  
People's Republic of China

<sup>b</sup>State Key Laboratory of Structural Chemistry, Fujian Institute of Research on the  
Structure of Matter, Chinese Academy of Sciences, Fuzhou, Fujian 350002, China

\*E-mail: wuge@wmu.edu.cn

## Table of Contents

|                                                                                          |                |
|------------------------------------------------------------------------------------------|----------------|
| <b>(1) General considerations, experimental data.....</b>                                | <b>S2-S21</b>  |
| <b>(2) References for known compounds.....</b>                                           | <b>S22</b>     |
| <b>(3) <sup>1</sup>H, <sup>13</sup>C and <sup>19</sup>F NMR spectra of products.....</b> | <b>S23-S58</b> |
| <b>(4) HRMS spectra of products.....</b>                                                 | <b>59-76</b>   |

## General Information

Maleimides<sup>1</sup> and trimethyltin fluoride<sup>2</sup> were prepared according to the reported procedures. <sup>1</sup>H and <sup>13</sup>C spectra of known compounds were in accordance with those described in the literatures. All other reagents were purchased from TCI, Sigma-Aldrich, Alfa Aesar, Acros, and Meryer and used without further purification. <sup>1</sup>H NMR (500 MHz), <sup>13</sup>C NMR (125 MHz) and <sup>19</sup>F NMR (470 MHz) spectra were recorded in CDCl<sub>3</sub> and DMSO-D6 solutions using a Burker AVANCE 500 spectrometer. High-resolution mass spectra were recorded on an ESI-Q-TOF mass spectrometer. Analysis of crude reaction mixture was done on the Varian 4000 GC/MS and 1200 LC. All reactions were conducted using standard Schlenk techniques. Column chromatography was performed using EM silica gel 60 (300–400 m).

## General Experimental Procedures

### General Procedure of Aminoalkylation of Maleimides with Alkylamines and $R_3SnF$ :

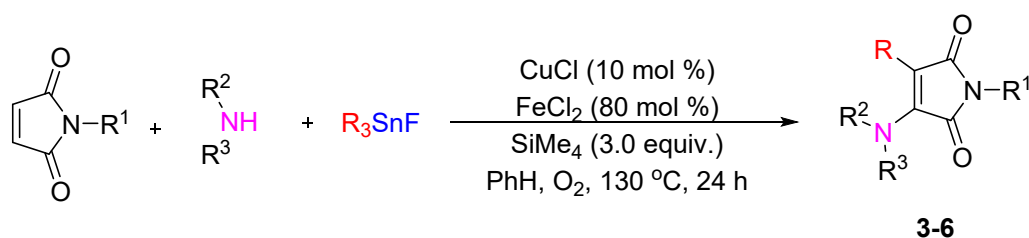

A 25 mL Schlenk tube equipped with a stir bar was charged with maleimide (0.2 mmol), secondary amines (0.6 mmol), organotin fluoride compounds (0.6 mmol), CuBr (10 mol %), FeCl<sub>2</sub> (80 mol %), SiMe<sub>4</sub> (0.6 mmol) and 2.0 mL PhH. The tube was fitted with a rubber septum, and then it was evacuated and refilled with dioxygen three times, then the septum was replaced by a Teflon screwcap under oxygen flow. The reaction mixture was stirred at 130 °C for 24 h. After cooling down, the reaction mixture was diluted with 10 mL of ethyl ether, filtered through a pad of silica gel, followed by washing the pad of the silica gel with the same solvent (20 mL), concentrated under reduced pressure. The residue was then purified by flash chromatography on silica gel to provide the corresponding product.

### Mechanistic Studies

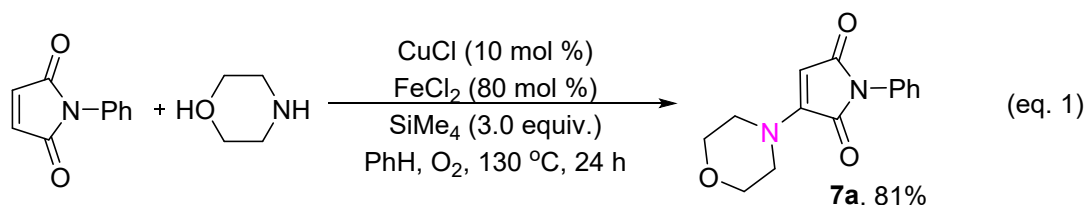

A 25 mL Schlenk tube equipped with a stir bar was charged with *N*-phenyl maleimide (0.2 mmol), morpholine (0.6 mmol), CuBr (10 mol %), FeCl<sub>2</sub> (80 mol %), SiMe<sub>4</sub> (0.6 mmol) and 2.0 mL PhH. The tube was fitted with a rubber septum, and then it was evacuated and refilled with dioxygen three times, then the septum was replaced by a Teflon screwcap under oxygen flow. The reaction mixture was stirred at 130 °C. After stirring for 24 h, the reaction mixture was cooled to room temperature and the reaction was filtered through a pad of Celite and diluted with ethyl acetate (10 mL), aminated maleimide **7a** was isolated in 81% yield.

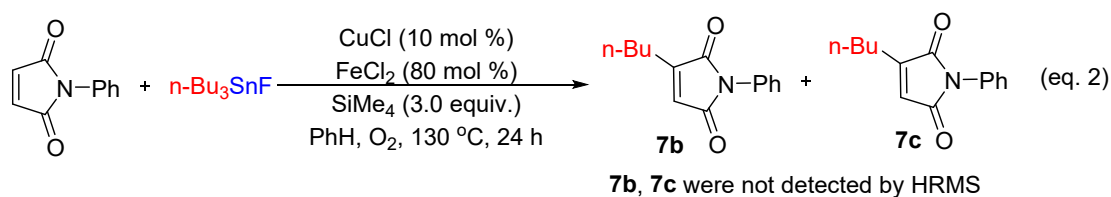

A 25 mL Schlenk tube equipped with a stir bar was charged with *N*-phenyl maleimide (0.2 mmol), fluorotributyltin (0.6 mmol), CuBr (10 mol %), FeCl<sub>2</sub> (80 mol %), SiMe<sub>4</sub> (0.6 mmol) and 2.0 mL PhH. The tube was fitted with a rubber septum, and then it was evacuated and refilled with dioxygen three times, then the septum was replaced by a Teflon screwcap under oxygen flow. The reaction mixture was stirred at 130 °C. After stirring for 24 h, the reaction mixture was cooled to room temperature and the reaction was filtered through a pad of Celite and diluted with ethyl acetate (10 mL), oxidative alkylated **7b** or hydroalkylated maleimide **7c** were not detected by HRMS.

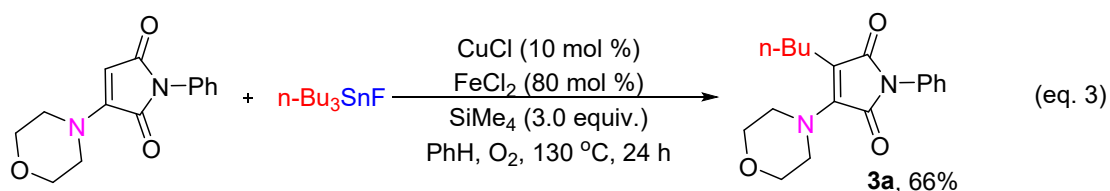

A 25 mL Schlenk tube equipped with a stir bar was charged with 3-morpholino-1-phenyl-1H-pyrrole-2,5-dione (0.2 mmol), fluorotributyltin (0.6 mmol), CuBr (10 mol %), FeCl<sub>2</sub> (80 mol %), SiMe<sub>4</sub> (0.6 mmol) and 2.0 mL PhH. The tube was fitted with a rubber septum, and then it was evacuated and refilled with dioxygen three times, then the septum was replaced by a Teflon screwcap under oxygen flow. The reaction mixture was stirred at 130 °C. After stirring for 24 h, the reaction mixture was cooled to room temperature and the reaction was filtered through a pad of Celite and diluted with ethyl acetate (10 mL), the butylated product **3a** was isolated in 66%.

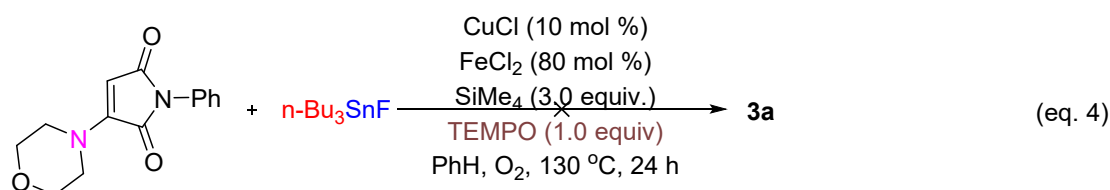

A 25 mL Schlenk tube equipped with a stir bar was charged with 3-morpholino-1-phenyl-1H-pyrrole-2,5-dione (0.2 mmol), TEMPO (0.2 mmol), fluorotributyltin (0.6 mmol), CuBr (10 mol %), FeCl<sub>2</sub> (80 mol %), SiMe<sub>4</sub> (0.6 mmol) and 2.0 mL PhH. The tube was fitted with a rubber septum, and then it was evacuated and refilled with dioxygen three times, then the septum was replaced by a Teflon screwcap under oxygen flow. The reaction mixture was stirred at 130 °C. After stirring for 24 h, the reaction mixture was cooled to room temperature and the reaction was filtered through a pad of Celite and diluted with ethyl acetate (10 mL), no reaction was observed.

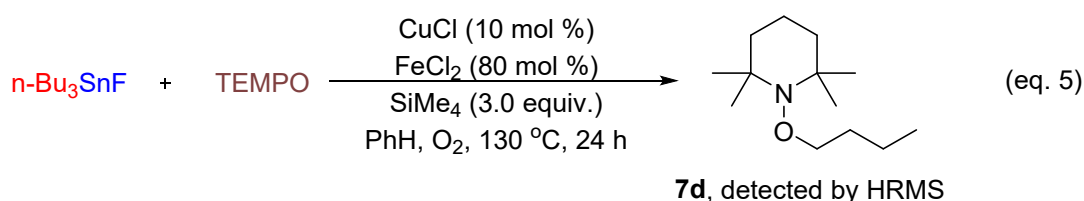

A 25 mL Schlenk tube equipped with a stir bar was charged with TEMPO (0.2 mmol), fluorotributyltin (0.6 mmol), CuBr (10 mol %), FeCl<sub>2</sub> (80 mol %), SiMe<sub>4</sub> (0.6 mmol) and 2.0 mL PhH. The tube was fitted with a rubber septum, and then it was evacuated and refilled with dioxygen three times, then the septum was replaced by a Teflon screwcap under oxygen flow. The

reaction mixture was stirred at 130 °C. After stirring for 24 h, the reaction mixture was cooled to room temperature and the reaction was filtered through a pad of Celite and diluted with ethyl acetate (10 mL), the radical trapped product **7d** was detected by HRMS.

wg3 #15 RT: 0.20 AV: 1 SB: 6 0.01-0.09 NL: 2.73E7  
T: FTMS (1,1) + p ESI Full ms [100.00-1000.00]

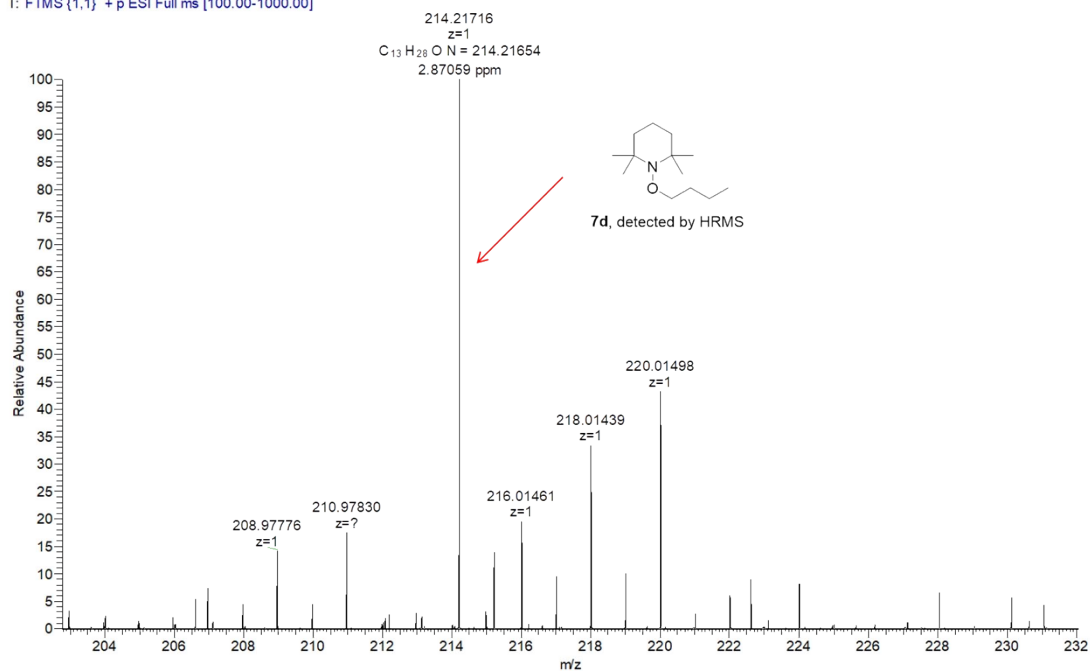

## Characterization of Products in Details:

3-butyl-4-morpholino-1-phenyl-1H-pyrrole-2,5-dione

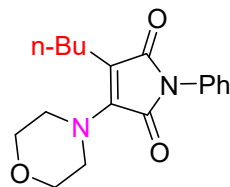

**3a**

Following the general procedure, using (petroleum ether : EtOAc = 9 : 1) as the eluant afforded a yellow liquid (46.5 mg, 74% yield). **<sup>1</sup>H NMR** (400 MHz, CDCl<sub>3</sub>): δ 7.46 (t, *J* = 7.8 Hz, 2H), 7.38-7.32 (m, 3H), 3.87-3.84 (m, 4H), 3.78-3.75 (m, 4H), 2.52-2.48 (m, 2H), 1.54 (tt, *J* = 7.9, 5.9 Hz, 2H), 1.43 (dt, *J* = 14.7, 7.4 Hz, 2H), 0.99 (t, *J* = 7.2 Hz, 3H); **<sup>13</sup>C NMR** (100 MHz, CDCl<sub>3</sub>): δ 171.21, 167.37, 143.54, 132.02, 128.90, 127.28, 126.09, 108.97, 67.03, 48.93, 32.76, 23.27, 22.77, 13.94. **HRMS** (ESI): calcd for C<sub>18</sub>H<sub>23</sub>N<sub>2</sub>O<sub>3</sub> [M + H]<sup>+</sup> 315.1709, found 315.1712.

3-butyl-1-phenyl-4-(piperidin-1-yl)-1H-pyrrole-2,5-dione

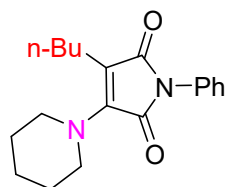

**3b**

Following the general procedure, using (petroleum ether : EtOAc = 9 : 1) as the eluant afforded a yellow liquid (44.3 mg, 71% yield). **<sup>1</sup>H NMR** (400 MHz, CDCl<sub>3</sub>): δ 7.47-7.43 (m, 2H), 7.39-7.37 (m, 2H), 7.34-7.30 (m, 1H), 3.70 (d, *J* = 4.8 Hz, 2H), 2.51-2.47 (m, 2H), 1.73 (d, *J* = 3.4 Hz, 6H), 1.54 (tt, *J* = 7.7, 5.9 Hz, 2H), 1.46-1.41 (m, 2H), 0.98 (t, *J* = 7.2 Hz, 3H). **<sup>13</sup>C NMR** (100 MHz, CDCl<sub>3</sub>): δ 171.56, 167.47, 144.40, 132.32, 128.79, 127.00, 126.09, 106.55, 50.10, 32.63, 26.49, 24.24, 23.45, 22.78, 13.95. **HRMS** (ESI): calcd for C<sub>19</sub>H<sub>25</sub>N<sub>2</sub>O<sub>2</sub> [M + H]<sup>+</sup> 313.1916, found 313.1915.

3-butyl-4-(4-methylpiperidin-1-yl)-1-phenyl-1H-pyrrole-2,5-dione

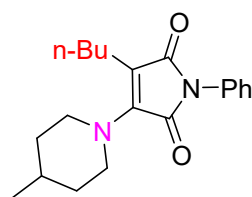

**3c**

Following the general procedure, using (petroleum ether : EtOAc = 9 : 1) as the eluant afforded a yellow liquid (45.6 mg, 70% yield). **<sup>1</sup>H NMR** (400 MHz, CDCl<sub>3</sub>): δ 7.46-7.42 (m, 2H), 7.39-7.36 (m, 2H), 7.34-7.30 (m, 1H), 4.34-4.30 (m, 2H), 3.09 (td, *J* = 12.6, 2.5 Hz, 2H), 2.49 (dd, *J* = 8.6, 6.9 Hz, 2H), 1.80-1.75 (m, 2H), 1.67 (td, *J* = 11.3, 9.6, 5.7 Hz, 1H), 1.53 (qd, *J* = 7.8, 7.3, 4.0 Hz, 1H), 1.46-1.31 (m, 4H), 1.03-0.96 (m, 6H). **<sup>13</sup>C NMR** (100 MHz, CDCl<sub>3</sub>): δ 171.55, 167.48, 144.31, 132.32, 128.79, 127.01, 126.10, 106.65, 49.40, 34.69, 32.63, 30.77, 23.45, 22.78, 21.88, 13.95. **HRMS** (ESI): calcd for C<sub>20</sub>H<sub>27</sub>N<sub>2</sub>O<sub>2</sub> [M + H]<sup>+</sup> 327.2073, found 327.2080.

methyl 1-(4-butyl-2,5-dioxo-1-phenyl-2,5-dihydro-1H-pyrrol-3-yl)piperidine-3-carboxylate

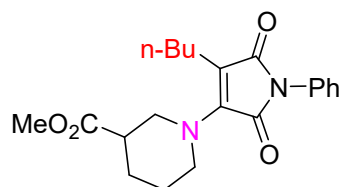

**3d**

Following the general procedure, using (petroleum ether : EtOAc = 9 : 1) as the eluant afforded a yellow liquid (48.8 mg, 66% yield). **<sup>1</sup>H NMR** (400 MHz, CDCl<sub>3</sub>): δ 7.46-7.42 (m, 2H), 7.37-7.32 (m, 3H), 4.22 (dd, *J* = 13.4, 4.1 Hz, 2H), 3.74 (s, 3H), 3.26 (ddd, *J* = 13.6, 10.9, 2.9 Hz, 2H), 2.62 (tt, *J* = 10.5, 4.1 Hz, 1H), 2.50-2.46 (m, 2H), 2.07-2.02 (m, 2H), 1.90 (dtd, *J* = 14.3, 10.8, 3.9 Hz, 2H), 1.53 (tt, *J* = 7.8, 5.9 Hz, 2H), 1.45-1.40 (m, 2H), 0.97 (t, *J* = 7.3 Hz, 3H). **<sup>13</sup>C NMR** (100 MHz, CDCl<sub>3</sub>): δ 174.63, 171.36, 167.37, 143.90, 132.16, 128.83, 127.13, 126.09, 107.92, 51.96, 48.29, 40.48, 32.51, 28.49, 27.90, 26.89, 23.42, 22.78, 13.92. **HRMS** (ESI): calcd for C<sub>21</sub>H<sub>27</sub>N<sub>2</sub>O<sub>4</sub> [M + H]<sup>+</sup> 371.1971, found 371.1980.

3-(azepan-1-yl)-4-butyl-1-phenyl-1H-pyrrole-2,5-dione

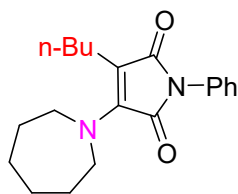

**3e**

Following the general procedure, using (petroleum ether : EtOAc = 9 : 1) as the eluant afforded a yellow liquid (32.6 mg, 50% yield). **<sup>1</sup>H NMR** (400 MHz, CDCl<sub>3</sub>): δ 7.45 (t, *J* = 7.7 Hz, 2H), 7.39-7.37 (m, 2H), 7.34-7.31 (m, 1H), 3.80 (t, *J* = 6.0 Hz, 4H), 2.52-2.48 (m, 2H), 1.87-1.84 (m, 4H), 1.70-1.63 (m, 4H), 1.53-1.49 (m, 2H), 1.45-1.38 (m, 2H), 0.97 (t, *J* = 6.9 Hz, 3H). **<sup>13</sup>C NMR** (100 MHz, CDCl<sub>3</sub>): δ 171.72, 167.03, 143.35, 132.39, 128.77, 126.95, 126.15, 102.51, 52.07, 33.77, 29.01, 26.84, 23.59, 22.67, 13.99. **HRMS** (ESI): calcd for C<sub>20</sub>H<sub>27</sub>N<sub>2</sub>O<sub>2</sub> [M + H]<sup>+</sup> 327.2073, found 327.2083.

3-butyl-4-(3,4-dihydroisoquinolin-2(1H)-yl)-1-phenyl-1H-pyrrole-2,5-dione

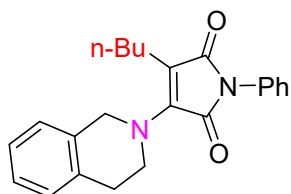

**3f**

Following the general procedure, using (petroleum ether : EtOAc = 9 : 1) as the eluant afforded a yellow liquid (47.5 mg, 66% yield). **<sup>1</sup>H NMR** (400 MHz, CDCl<sub>3</sub>): δ 7.49-7.45 (m, 2H), 7.41-7.38 (m, 2H), 7.36-7.32 (m, 1H), 7.27-7.25 (m, 2H), 7.23-7.20 (m, 1H), 7.16-7.14 (m, 1H), 4.94 (s, 2H), 4.07 (t, *J* = 5.9 Hz, 2H), 3.06 (t, *J* = 5.9 Hz, 2H), 2.60-2.56 (m, 2H), 1.59 (tt, *J* = 7.6, 5.9 Hz, 2H), 1.48 (p, *J* = 7.2 Hz, 2H), 1.01 (t, *J* = 7.2 Hz, 3H). **<sup>13</sup>C NMR** (100 MHz, CDCl<sub>3</sub>): δ 171.46, 167.35, 143.66, 134.24, 133.26, 132.19, 128.96, 128.87, 127.16, 127.01, 126.56, 126.20, 126.13, 106.79, 50.76, 46.71, 33.10, 29.27, 23.52, 22.81, 13.99. **HRMS** (ESI): calcd for C<sub>23</sub>H<sub>25</sub>N<sub>2</sub>O<sub>2</sub> [M + H]<sup>+</sup> 361.1916, found 361.1921.

3-butyl-1-phenyl-4-(4-(pyrimidin-2-yl)piperazin-1-yl)-1H-pyrrole-2,5-dione



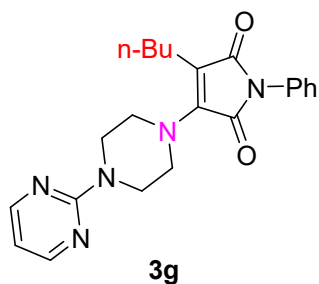

Following the general procedure, using (petroleum ether : EtOAc = 9 : 1) as the eluant afforded a yellow solid (63.4 mg, 81% yield), Mp = 92-93 °C. **<sup>1</sup>H NMR** (400 MHz, CDCl<sub>3</sub>): δ 8.38 (d, *J* = 4.8 Hz, 2H), 7.48-7.44 (m, 2H), 7.39-7.32 (m, 3H), 6.59 (t, *J* = 4.8 Hz, 1H), 4.02-4.00 (m, 4H), 3.85-3.83 (m, 4H), 2.55-2.51 (m, 2H), 1.56 (ddd, *J* = 9.9, 6.4, 2.7 Hz, 2H), 1.47-1.41 (m, 2H), 0.98 (t, *J* = 7.2 Hz, 3H). **<sup>13</sup>C NMR** (100 MHz, CDCl<sub>3</sub>): δ 171.27, 167.44, 161.55, 157.89, 143.76, 132.07, 128.89, 127.25, 126.10, 110.59, 108.77, 48.49, 43.97, 32.74, 23.39, 22.80, 13.93. **HRMS** (ESI): calcd for C<sub>22</sub>H<sub>26</sub>N<sub>3</sub>O<sub>2</sub> [M + H]<sup>+</sup> 392.2087, found 392.2083.

3-butyl-1-phenyl-4-(pyrrolidin-1-yl)-1H-pyrrole-2,5-dione

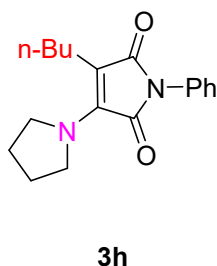

Following the general procedure, using (petroleum ether : EtOAc = 9 : 1) as the eluant afforded a yellow solid (32.2 mg, 54% yield), Mp = 44-45 °C. **<sup>1</sup>H NMR** (400 MHz, CDCl<sub>3</sub>): δ 7.47-7.42 (m, 2H), 7.40-7.37 (m, 2H), 7.33-7.31 (m, 1H), 3.88-3.85 (m, 4H), 2.56-2.52 (m, 2H), 2.00-1.97 (m, 4H), 1.57-1.49 (m, 2H), 1.45-1.38 (m, 2H), 0.98 (t, *J* = 7.2 Hz, 3H). **<sup>13</sup>C NMR** (100 MHz, CDCl<sub>3</sub>): δ 172.02, 166.94, 142.16, 132.49, 128.77, 126.87, 126.07, 101.37, 50.44, 34.84, 25.40, 22.89, 22.69, 14.04. **HRMS** (ESI): calcd for C<sub>18</sub>H<sub>23</sub>N<sub>2</sub>O<sub>2</sub> [M + H]<sup>+</sup> 299.1760, found 299.1761.

3-butyl-4-(dibutylamino)-1-phenyl-1H-pyrrole-2,5-dione

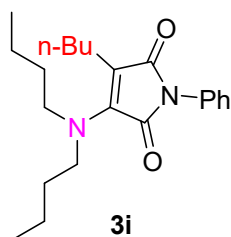

Following the general procedure, using (petroleum ether : EtOAc = 9 : 1) as the eluant afforded a yellow liquid (49.2 mg, 69% yield). **<sup>1</sup>H NMR** (400 MHz, CDCl<sub>3</sub>): δ 7.47-7.43 (m, 2H), 7.40-7.37 (m, 2H), 7.34-7.32 (m, 1H), 3.60-3.56 (m, 4H), 2.46-2.42 (m, 2H), 1.69-1.61 (m, 4H), 1.53-1.34 (m, 8H), 1.02-0.98 (m, 9H). **<sup>13</sup>C NMR** (100 MHz, CDCl<sub>3</sub>): δ 171.58, 167.23, 142.95, 132.39, 128.80, 126.97, 126.19, 103.21, 51.76, 33.52, 31.24, 23.46, 22.73, 19.94, 14.01, 13.97. **HRMS** (ESI): calcd for C<sub>22</sub>H<sub>33</sub>N<sub>2</sub>O<sub>2</sub> [M + H]<sup>+</sup> 357.2542, found 357.2550.

3-butyl-4-(methyl(phenethyl)amino)-1-phenyl-1H-pyrrole-2,5-dione

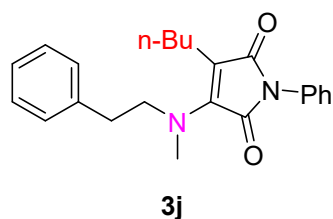

Following the general procedure, using (petroleum ether : EtOAc = 9 : 1) as the eluant afforded a yellow liquid (43.5 mg, 60% yield). **<sup>1</sup>H NMR** (400 MHz, CDCl<sub>3</sub>): δ 7.48-7.44 (m, 2H), 7.37-7.26 (m, 8H), 3.98-3.94 (m, 2H), 3.26 (s, 3H), 2.99 (dd, *J* = 8.6, 6.5 Hz, 2H), 2.53-2.49 (m, 2H), 1.53-1.45 (m, 2H), 1.43-1.36 (m, 2H), 0.97 (t, *J* = 7.2 Hz, 3H). **<sup>13</sup>C NMR** (100 MHz, CDCl<sub>3</sub>): δ 171.43, 167.08, 143.61, 138.36, 132.18, 128.96, 128.77, 128.60, 127.03, 126.61, 126.14, 104.67, 55.27, 40.41, 35.05, 33.71, 23.24, 22.63, 13.92. **HRMS** (ESI): calcd for C<sub>23</sub>H<sub>27</sub>N<sub>2</sub>O<sub>2</sub> [M + H]<sup>+</sup> 363.2073, found 363.2083.

3-butyl-4-((2-hydroxyethyl)(methyl)amino)-1-phenyl-1H-pyrrole-2,5-dione

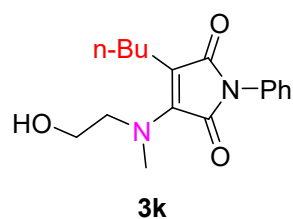

Following the general procedure, using (petroleum ether : EtOAc = 9 : 1) as the eluant afforded a

yellow liquid (39.3 mg, 65% yield). **<sup>1</sup>H NMR** (400 MHz, CDCl<sub>3</sub>): δ 7.47-7.44 (m, 2H), 7.37-7.32 (m, 3H), 3.90-3.85 (m, 4H), 3.30 (s, 3H), 2.58-2.54 (m, 2H), 2.36 (t, *J* = 5.1 Hz, 1H), 1.58-1.51 (m, 2H), 1.46-1.41 (m, 2H), 0.98 (t, *J* = 7.2 Hz, 3H). **<sup>13</sup>C NMR** (100 MHz, CDCl<sub>3</sub>): δ 171.33, 168.12, 144.54, 132.04, 128.89, 127.29, 126.16, 106.13, 60.84, 55.18, 40.12, 33.82, 23.23, 22.70, 13.97. **HRMS** (ESI): calcd for C<sub>17</sub>H<sub>23</sub>N<sub>2</sub>O<sub>3</sub> [M + H]<sup>+</sup> 303.1709, found 303.1721.

3-(4-benzoylpiperazin-1-yl)-4-butyl-1-phenyl-1H-pyrrole-2,5-dione

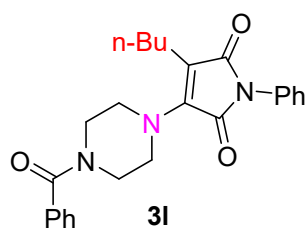

Following the general procedure, using (petroleum ether : EtOAc = 9 : 1) as the eluant afforded a yellow liquid (58.4 mg, 70% yield). **<sup>1</sup>H NMR** (400 MHz, CDCl<sub>3</sub>): δ 7.48-7.44 (m, 7H), 7.37-7.34 (m, 3H), 3.94-3.75 (m, 8H), 2.51-2.47 (m, 2H), 1.53 (qd, *J* = 7.7, 7.3, 4.0 Hz, 2H), 1.43 (q, *J* = 7.3 Hz, 2H), 0.98 (t, *J* = 7.2 Hz, 3H). **<sup>13</sup>C NMR** (100 MHz, CDCl<sub>3</sub>): δ 171.04, 170.67, 167.33, 143.42, 135.13, 131.91, 130.23, 128.94, 128.75, 127.37, 127.24, 126.05, 110.21, 48.81, 48.69, 32.60, 23.35, 22.81, 13.93. **HRMS** (ESI): calcd for C<sub>25</sub>H<sub>28</sub>N<sub>3</sub>O<sub>3</sub> [M + H]<sup>+</sup> 418.2131, found 418.2143.

1-benzyl-3-butyl-4-morpholino-1H-pyrrole-2,5-dione

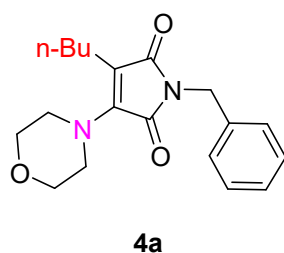

Following the general procedure, using (petroleum ether : EtOAc = 9 : 1) as the eluant afforded a yellow liquid (47.9 mg, 73% yield). **<sup>1</sup>H NMR** (400 MHz, CDCl<sub>3</sub>): δ 7.39-7.29 (m, 5H), 4.63 (s, 2H), 3.80 (t, *J* = 4.7 Hz, 4H), 3.69 (t, *J* = 4.7 Hz, 4H), 2.43-2.39 (m, 2H), 1.48-1.35 (m, 4H), 0.97-0.94 (m, 3H). **<sup>13</sup>C NMR** (100 MHz, CDCl<sub>3</sub>): δ 172.20, 168.31, 143.67, 137.00, 128.63, 128.50, 127.61, 108.50, 66.96, 48.71, 41.34, 32.89, 23.17, 22.75, 13.92. **HRMS** (ESI): calcd for C<sub>19</sub>H<sub>25</sub>N<sub>2</sub>O<sub>3</sub> [M + H]<sup>+</sup> 329.1865, found 329.1870.

3-butyl-1-(4-methylbenzyl)-4-morpholino-1H-pyrrole-2,5-dione

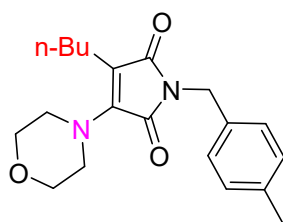

**4b**

Following the general procedure, using (petroleum ether : EtOAc = 9 : 1) as the eluant afforded a yellow solid (51.3 mg, 75% yield), Mp = 50-51 °C. <sup>1</sup>H NMR (400 MHz, CDCl<sub>3</sub>): δ 7.28 (d, *J* = 8.0 Hz, 2H), 7.15 (d, *J* = 7.9 Hz, 2H), 4.59 (s, 2H), 3.81-3.78 (m, 4H), 3.69-3.67 (m, 4H), 2.42-2.38 (m, 2H), 2.35 (s, 3H), 1.47-1.33 (m, 4H), 0.97-0.94 (m, 3H). <sup>13</sup>C NMR (100 MHz, CDCl<sub>3</sub>): δ 172.24, 168.32, 143.67, 137.32, 134.05, 129.29, 128.54, 108.51, 66.96, 48.70, 41.07, 32.88, 23.16, 22.75, 21.19, 13.92. HRMS (ESI): calcd for C<sub>20</sub>H<sub>27</sub>N<sub>2</sub>O<sub>3</sub> [M + H]<sup>+</sup> 343.2022, found 343.2022.

3-butyl-1-(4-fluorobenzyl)-4-morpholino-1H-pyrrole-2,5-dione

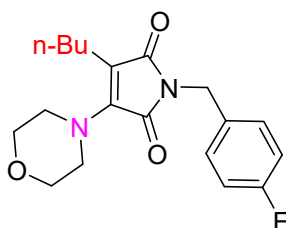

**4c**

Following the general procedure, using (petroleum ether : EtOAc = 9 : 1) as the eluant afforded a yellow solid (42.2 mg, 61% yield), Mp = 65-66 °C. <sup>1</sup>H NMR (400 MHz, CDCl<sub>3</sub>): δ 7.37-7.33 (m, 2H), 7.03-6.99 (m, 2H), 4.59 (s, 2H), 3.81-3.79 (m, 4H), 3.70-3.67 (m, 4H), 2.42-2.38 (m, 2H), 1.47-1.35 (m, 4H), 0.95 (t, *J* = 7.2 Hz, 3H). <sup>13</sup>C NMR (100 MHz, CDCl<sub>3</sub>): δ 172.12, 168.25, 162.29 (d, *J* = 245.6 Hz), 143.69, 132.82, 130.37 (d, *J* = 8.0 Hz), 115.46 (d, *J* = 21.4 Hz), 108.45, 66.94, 48.71, 40.61, 32.88, 23.16, 22.74, 13.90. <sup>19</sup>F NMR (375 MHz, CDCl<sub>3</sub>) δ -114.77; HRMS (ESI): calcd for C<sub>19</sub>H<sub>24</sub>N<sub>2</sub>O<sub>3</sub>F [M + H]<sup>+</sup> 347.1771, found 347.1759.

3-butyl-1-(4-chlorobenzyl)-4-morpholino-1H-pyrrole-2,5-dione

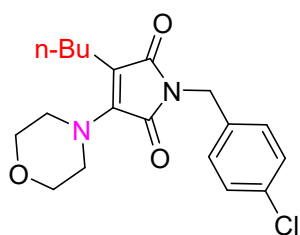

**4d**

Following the general procedure, using (petroleum ether : EtOAc = 9 : 1) as the eluant afforded a yellow solid (45.6 mg, 63% yield), Mp = 75-76°C. **<sup>1</sup>H NMR** (400 MHz, CDCl<sub>3</sub>): δ 7.30 (brs, 4H), 4.58 (s, 2H), 3.81-3.79 (m, 4H), 3.70-3.67 (m, 4H), 2.42-2.38 (m, 2H), 1.46-1.37 (m, 4H), 0.97-0.93 (m, 3H). **<sup>13</sup>C NMR** (100 MHz, CDCl<sub>3</sub>): δ 172.05, 168.21, 143.69, 135.43, 133.53, 129.98, 128.79, 108.42, 66.94, 48.70, 40.67, 32.87, 23.17, 22.74, 13.91. **HRMS** (ESI): calcd for C<sub>19</sub>H<sub>24</sub>N<sub>2</sub>O<sub>3</sub>Cl [M + H]<sup>+</sup> 363.1475, found 363.1470.

1-(4-bromobenzyl)-3-butyl-4-morpholino-1H-pyrrole-2,5-dione

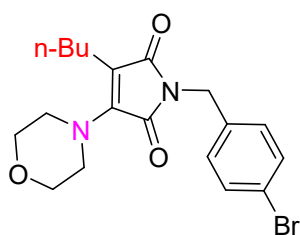

**4e**

Following the general procedure, using (petroleum ether : EtOAc = 9 : 1) as the eluant afforded a yellow solid (53.6 mg, 66% yield), Mp = 82-83°C. **<sup>1</sup>H NMR** (400 MHz, CDCl<sub>3</sub>): δ 7.45 (d, *J* = 8.4 Hz, 2H), 7.25 (d, *J* = 8.4 Hz, 2H), 4.57 (s, 2H), 3.81-3.79 (m, 4H), 3.70-3.67 (m, 4H), 2.42-2.38 (m, 2H), 1.47-1.35 (m, 4H), 0.95 (t, *J* = 7.0 Hz, 3H). **<sup>13</sup>C NMR** (100 MHz, CDCl<sub>3</sub>): δ 172.03, 168.19, 143.69, 135.94, 131.75, 130.32, 129.98, 128.78, 121.67, 108.40, 66.93, 48.70, 40.72, 32.86, 23.16, 22.74, 13.91. **HRMS** (ESI): calcd for C<sub>19</sub>H<sub>24</sub>N<sub>2</sub>O<sub>3</sub>Br [M + H]<sup>+</sup> 407.0970, found 407.0971.

3-butyl-4-morpholino-1-(4-(trifluoromethyl)benzyl)-1H-pyrrole-2,5-dione

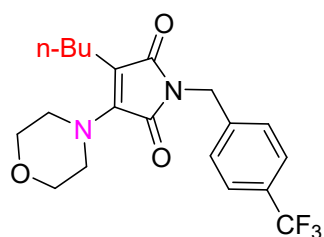

**4f**

Following the general procedure, using (petroleum ether : EtOAc = 9 : 1) as the eluant afforded a yellow solid (55.4 mg, 70% yield), Mp = 79-80°C. <sup>1</sup>H NMR (400 MHz, CDCl<sub>3</sub>): δ 7.60 (d, *J* = 8.0 Hz, 2H), 7.47 (d, *J* = 8.0 Hz, 2H), 4.67 (s, 2H), 3.82-3.80 (m, 4H), 3.71-3.69 (m, 4H), 2.44-2.40 (m, 2H), 1.49-1.38 (m, 4H), 0.98-0.094 (m, 3H). <sup>13</sup>C NMR (100 MHz, CDCl<sub>3</sub>): δ 171.98, 168.18, 143.70, 140.81, 129.90 (d, *J* = 32.3 Hz), 128.72, 125.64 (q, *J* = 3.7 Hz), 124.05 (d, *J* = 271.0 Hz), 108.38, 66.93, 48.71, 40.86, 32.86, 23.18, 22.73, 13.89. <sup>19</sup>F NMR (375 MHz, CDCl<sub>3</sub>) δ -62.56 (3F); HRMS (ESI): calcd for C<sub>20</sub>H<sub>24</sub>N<sub>2</sub>O<sub>3</sub>F<sub>3</sub> [M + H]<sup>+</sup> 397.1739, found 397.1745.

3-butyl-4-morpholino-1-(naphthalen-1-ylmethyl)-1H-pyrrole-2,5-dione

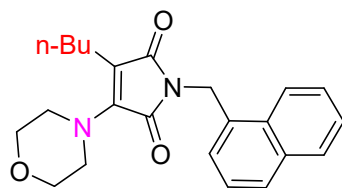

**4g**

Following the general procedure, using (petroleum ether : EtOAc = 9 : 1) as the eluant afforded a yellow liquid (53.7 mg, 71% yield). <sup>1</sup>H NMR (400 MHz, CDCl<sub>3</sub>): δ 8.34 (d, *J* = 8.4 Hz, 1H), 7.89 (dd, *J* = 8.2, 1.4 Hz, 1H), 7.83 (d, *J* = 8.2 Hz, 1H), 7.57 (tt, *J* = 14.2, 7.0 Hz, 3H), 7.49-7.45 (m, 1H), 5.11 (s, 2H), 3.81-3.79 (m, 4H), 3.69-3.67 (m, 4H), 2.45-2.41 (m, 2H), 1.49-1.37 (m, 4H), 0.96 (t, *J* = 7.0 Hz, 3H). <sup>13</sup>C NMR (100 MHz, CDCl<sub>3</sub>): δ 172.34, 168.54, 143.67, 133.81, 132.16, 131.34, 128.73, 128.49, 127.45, 126.45, 125.80, 125.39, 123.69, 108.56, 66.95, 48.71, 39.35, 32.90, 23.21, 22.75, 13.93. HRMS (ESI): calcd for C<sub>23</sub>H<sub>27</sub>N<sub>2</sub>O<sub>3</sub> [M + H]<sup>+</sup> 379.2022, found 379.2036.

3-butyl-4-morpholino-1-(thiophen-2-ylmethyl)-1H-pyrrole-2,5-dione

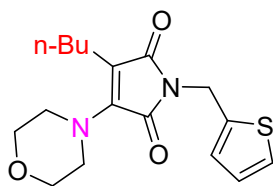

**4h**

Following the general procedure, using (petroleum ether : EtOAc = 9 : 1) as the eluant afforded a yellow liquid (33.4 mg, 50% yield). **<sup>1</sup>H NMR** (400 MHz, CDCl<sub>3</sub>): δ 7.23 (dd, *J* = 5.1, 1.3 Hz, 1H), 7.08 (t, *J* = 2.2 Hz, 1H), 6.96 (dd, *J* = 5.1, 3.5 Hz, 1H), 4.80 (s, 2H), 3.82-3.80 (m, 2H), 3.71-3.68 (m, 2H), 2.43-2.39 (m, 2H), 1.48-1.38 (m, 4H), 0.98-0.94 (m, 3H). **<sup>13</sup>C NMR** (100 MHz, CDCl<sub>3</sub>): δ 171.70, 167.90, 143.72, 138.90, 127.27, 126.86, 125.60, 108.51, 66.95, 48.70, 35.48, 32.84, 23.14, 22.72, 13.90. **HRMS** (ESI): calcd for C<sub>17</sub>H<sub>23</sub>N<sub>2</sub>O<sub>3</sub>S [M + H]<sup>+</sup> 335.1429, found 335.1439.

3-butyl-1-(3,4-dichlorobenzyl)-4-morpholino-1H-pyrrole-2,5-dione

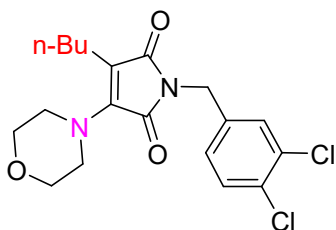

**4i**

Following the general procedure, using (petroleum ether : EtOAc = 9 : 1) as the eluant afforded a yellow solid (40.4 mg, 51% yield), Mp = 99-100°C. **<sup>1</sup>H NMR** (400 MHz, CDCl<sub>3</sub>): δ 7.45 (d, *J* = 2.1 Hz, 1H), 7.40 (d, *J* = 8.2 Hz, 1H), 7.21 (dd, *J* = 8.2, 2.1 Hz, 1H), 4.56 (s, 2H), 3.82-3.80 (m, 4H), 3.71-3.69 (m, 4H), 2.43-2.39 (m, 2H), 1.48-1.36 (m, 4H), 0.95 (t, *J* = 7.1 Hz, 3H). **<sup>13</sup>C NMR** (100 MHz, CDCl<sub>3</sub>): δ 171.87, 168.10, 143.71, 137.06, 132.63, 131.84, 130.61, 130.48, 127.97, 108.35, 66.93, 48.71, 40.25, 32.84, 23.18, 22.73, 13.90. **HRMS** (ESI): calcd for C<sub>19</sub>H<sub>23</sub>N<sub>2</sub>O<sub>3</sub>Cl<sub>2</sub> [M + H]<sup>+</sup> 397.1086, found 397.1095.

3-butyl-1-(4-chlorophenyl)-4-morpholino-1H-pyrrole-2,5-dione

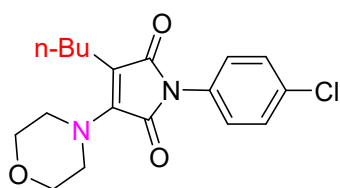

**4j**

Following the general procedure, using (petroleum ether : EtOAc = 9 : 1) as the eluant afforded a yellow solid (46.6 mg, 67% yield), Mp = 80-81 °C. <sup>1</sup>H NMR (400 MHz, CDCl<sub>3</sub>): δ 7.42 (d, *J* = 8.8 Hz, 2H), 7.33 (d, *J* = 8.8 Hz, 2H), 3.86-3.83 (m, 4H), 3.77-3.74 (m, 4H), 2.50-2.46 (m, 2H), 1.54-1.39 (m, 4H), 0.98 (t, *J* = 7.2 Hz, 3H). <sup>13</sup>C NMR (100 MHz, CDCl<sub>3</sub>): δ 170.85, 167.04, 143.59, 132.77, 130.57, 129.04, 127.09, 108.88, 66.99, 48.92, 32.71, 23.26, 22.76, 13.92. HRMS (ESI): calcd for C<sub>18</sub>H<sub>22</sub>N<sub>2</sub>O<sub>3</sub>Cl [M + H]<sup>+</sup> 349.1319, found 349.1333.

3-butyl-1-(4-methoxybenzyl)-4-morpholino-1H-pyrrole-2,5-dione

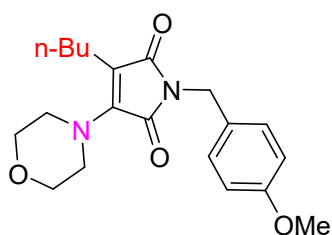

**4k**

Following the general procedure, using (petroleum ether : EtOAc = 9 : 1) as the eluant afforded a yellow solid (50.1 mg, 70% yield), Mp = 62-63 °C. <sup>1</sup>H NMR (400 MHz, CDCl<sub>3</sub>): δ 7.33 (d, *J* = 7.1 Hz, 2H), 6.87 (d, *J* = 6.9 Hz, 2H), 4.57 (s, 2H), 3.82-3.79 (m, 7H), 3.70-3.68 (m, 4H), 2.42-2.38 (m, 2H), 1.46-1.38 (m, 4H), 0.98-0.94 (m, 3H). <sup>13</sup>C NMR (100 MHz, CDCl<sub>3</sub>): δ 172.26, 168.33, 159.08, 143.68, 130.00, 129.28, 113.95, 108.50, 66.96, 55.30, 48.70, 40.77, 32.89, 23.15, 22.75, 13.91. HRMS (ESI): calcd for C<sub>20</sub>H<sub>27</sub>N<sub>2</sub>O<sub>4</sub> [M + H]<sup>+</sup> 359.1971, found 359.1982.

3-butyl-1-methyl-4-morpholino-1H-pyrrole-2,5-dione

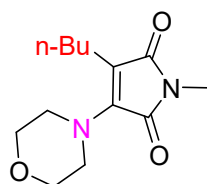

**4l**



Following the general procedure, using (petroleum ether : EtOAc = 9 : 1) as the eluant afforded a yellow liquid (37.3 mg, 74% yield). **<sup>1</sup>H NMR** (400 MHz, CDCl<sub>3</sub>): δ 3.82-3.80 (m, 4H), 3.70-3.68 (m, 4H), 2.96 (s, 3H), 2.42-2.39 (m, 2H), 1.48-1.35 (m, 4H), 0.95 (t, *J* = 7.1 Hz, 3H). **<sup>13</sup>C NMR** (100 MHz, CDCl<sub>3</sub>): δ 172.69, 168.78, 143.77, 108.73, 66.98, 48.75, 32.92, 23.64, 23.08, 22.70, 13.92. **HRMS** (ESI): calcd for C<sub>13</sub>H<sub>21</sub>N<sub>2</sub>O<sub>3</sub> [M + H]<sup>+</sup> 253.1552, found 253.1556.

3-methyl-4-morpholino-1-phenyl-1H-pyrrole-2,5-dione

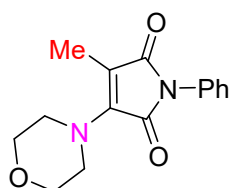

**5a**

Following the general procedure, using (petroleum ether : EtOAc = 9 : 1) as the eluant afforded a yellow solid (35.9 mg, 66% yield), Mp = 96-97°C. **<sup>1</sup>H NMR** (400 MHz, CDCl<sub>3</sub>): δ 7.48-7.44 (m, 2H), 7.36-7.33 (m, 3H), 3.86-3.81 (m, 8H), 2.11 (s, 3H). **<sup>13</sup>C NMR** (100 MHz, CDCl<sub>3</sub>): δ 171.35, 167.19, 143.95, 132.01, 128.94, 127.35, 126.16, 103.22, 67.14, 48.85, 9.28. **HRMS** (ESI): calcd for C<sub>15</sub>H<sub>17</sub>N<sub>2</sub>O<sub>3</sub> [M + H]<sup>+</sup> 273.1239, found 273.1248.

3-methyl-1-phenyl-4-(piperidin-1-yl)-1H-pyrrole-2,5-dione

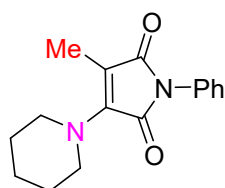

**5b**

Following the general procedure, using (petroleum ether : EtOAc = 9 : 1) as the eluant afforded a yellow solid (34.6 mg, 64% yield), Mp = 71-72°C. **<sup>1</sup>H NMR** (400 MHz, CDCl<sub>3</sub>): δ 7.47-7.43 (m, 2H), 7.38-7.31 (m, 3H), 3.77-3.74 (m, 4H), 2.10 (s, 3H), 1.74-1.72 (m, 6H). **<sup>13</sup>C NMR** (100 MHz, CDCl<sub>3</sub>): δ 167.30, 144.86, 132.32, 128.84, 127.07, 126.16, 100.92, 49.98, 26.72, 24.29, 9.37. **HRMS** (ESI): calcd for C<sub>16</sub>H<sub>19</sub>N<sub>2</sub>O<sub>2</sub> [M + H]<sup>+</sup> 271.1447, found 271.1453.

3-methyl-4-(4-methylpiperidin-1-yl)-1-phenyl-1H-pyrrole-2,5-dione

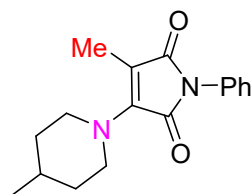

**5c**

Following the general procedure, using (petroleum ether : EtOAc = 9 : 1) as the eluant afforded a yellow solid (34.7 mg, 61% yield), Mp = 65-66°C. <sup>1</sup>H NMR (400 MHz, CDCl<sub>3</sub>): δ 7.47-7.43 (m, 2H), 7.38-7.31 (m, 3H), 4.41 (dt, *J* = 13.2, 2.3 Hz, 2H), 3.12 (td, *J* = 13.1, 12.7, 2.5 Hz, 2H), 2.10 (s, 3H), 1.78 (dd, *J* = 13.3, 2.7 Hz, 2H), 1.69 (ddq, *J* = 11.0, 6.8, 3.6 Hz, 1H), 1.40-1.32 (m, 2H), 1.02 (d, *J* = 6.5 Hz, 3H). <sup>13</sup>C NMR (100 MHz, CDCl<sub>3</sub>): δ 171.68, 167.31, 144.79, 132.31, 128.85, 127.09, 126.17, 101.04, 49.28, 34.90, 30.83, 21.89, 9.37. HRMS (ESI): calcd for C<sub>17</sub>H<sub>21</sub>N<sub>2</sub>O<sub>2</sub> [M + H]<sup>+</sup> 285.1603, found 285.1600.

3-methyl-4-(octahydroisoquinolin-2(1H)-yl)-1-phenyl-1H-pyrrole-2,5-dione

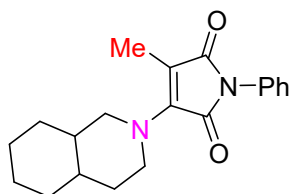

**5d**

Following the general procedure, using (petroleum ether : EtOAc = 9 : 1) as the eluant afforded a yellow liquid (45.4 mg, 70% yield). <sup>1</sup>H NMR (400 MHz, CDCl<sub>3</sub>): δ 7.48-7.44 (m, 2H), 7.39-7.31 (m, 3H), 3.43 (ddq, *J* = 18.1, 12.3, 5.9, 5.5 Hz, 2H), 3.26 (td, *J* = 10.3, 3.1 Hz, 1H), 2.06 (s, 3H), 1.94-1.90 (m, 1H), 1.82-1.71 (m, 6H), 1.52-1.9 (m, 6H). <sup>13</sup>C NMR (100 MHz, CDCl<sub>3</sub>): δ 171.30, 168.02, 146.55, 132.14, 128.91, 127.20, 126.07, 104.46, 63.30, 48.96, 40.81, 32.97, 32.31, 29.45, 26.11, 25.26, 25.05, 9.11. HRMS (ESI): calcd for C<sub>20</sub>H<sub>25</sub>N<sub>2</sub>O<sub>2</sub> [M + H]<sup>+</sup> 325.1916, found 325.1908.

3-(3,4-dihydroisoquinolin-2(1H)-yl)-4-methyl-1-phenyl-1H-pyrrole-2,5-dione

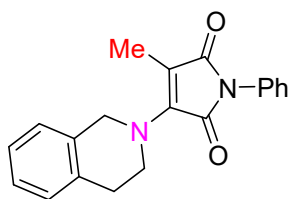

**5e**

Following the general procedure, using (petroleum ether : EtOAc = 9 : 1) as the eluant afforded a yellow liquid (37.5 mg, 59% yield). **<sup>1</sup>H NMR** (400 MHz, CDCl<sub>3</sub>): δ 7.48-7.44 (m, 2H), 7.39-7.34 (m, 3H), 7.27-7.20 (m, 3H), 7.16-7.14 (m, 1H), 5.00 (s, 2H), 4.08 (t, *J* = 5.9 Hz, 2H), 3.06 (t, *J* = 5.9 Hz, 2H), 2.19 (s, 3H). **<sup>13</sup>C NMR** (100 MHz, CDCl<sub>3</sub>): δ 171.60, 167.19, 144.24, 134.12, 133.36, 132.20, 129.01, 128.91, 127.23, 127.00, 126.58, 126.20, 101.17, 50.68, 46.54, 29.43, 9.33. **HRMS** (ESI): calcd for C<sub>20</sub>H<sub>19</sub>N<sub>2</sub>O<sub>2</sub> [M + H]<sup>+</sup> 319.1447, found 319.1442.

3-methyl-1-phenyl-4-(pyrrolidin-1-yl)-1H-pyrrole-2,5-dione

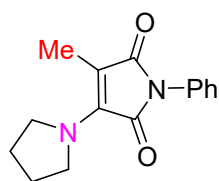

**5f**

Following the general procedure, using (petroleum ether : EtOAc = 9 : 1) as the eluant afforded a yellow solid (25.6 mg, 50% yield), Mp = 96-97°C. **<sup>1</sup>H NMR** (400 MHz, CDCl<sub>3</sub>): δ 7.47-7.43 (m, 2H), 7.39-7.36 (m, 2H), 7.34-7.32 (m, 1H), 3.93-3.90 (m, 4H), 2.17 (s, 3H), 1.99-1.96 (m, 4H). **<sup>13</sup>C NMR** (100 MHz, CDCl<sub>3</sub>): δ 172.23, 166.78, 149.03, 132.48, 128.82, 126.96, 126.13, 95.79, 50.42, 25.38, 8.39. **HRMS** (ESI): calcd for C<sub>15</sub>H<sub>17</sub>N<sub>2</sub>O<sub>2</sub> [M + H]<sup>+</sup> 257.1290, found 257.1289.

3-methyl-4-(methyl(phenethyl)amino)-1-phenyl-1H-pyrrole-2,5-dione

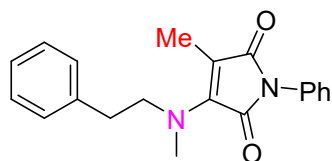

**5g**

Following the general procedure, using (petroleum ether : EtOAc = 9 : 1) as the eluant afforded a

yellow solid (37.1 mg, 58% yield), Mp = 68-69°C. <sup>1</sup>H NMR (400 MHz, CDCl<sub>3</sub>): δ 7.49-7.45 (m, 2H), 7.36-7.32 (m, 5H), 7.30-7.27 (m, 3H), 3.95 (t, *J* = 8.6 Hz, 2H), 3.31 (s, 3H), 3.00 (t, *J* = 8.6 Hz, 2H), 2.12 (s, 3H). <sup>13</sup>C NMR (100 MHz, CDCl<sub>3</sub>): δ 171.64, 167.01, 144.46, 138.41, 132.26, 129.01, 128.90, 128.69, 127.18, 126.75, 126.27, 99.33, 55.19, 40.40, 35.21, 9.17. HRMS (ESI): calcd for C<sub>20</sub>H<sub>21</sub>N<sub>2</sub>O<sub>2</sub> [M + H]<sup>+</sup> 321.1603, found 321.1602.

3-((2-hydroxyethyl)(methyl)amino)-4-methyl-1-phenyl-1H-pyrrole-2,5-dione

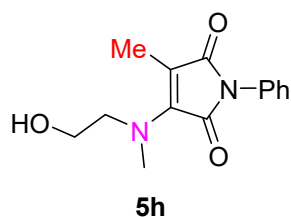

Following the general procedure, using (petroleum ether : EtOAc = 9 : 1) as the eluant afforded a yellow solid (31.7 mg, 61% yield), Mp = 84-85°C. <sup>1</sup>H NMR (400 MHz, CDCl<sub>3</sub>): δ 7.48-7.44 (m, 2H), 7.36-7.32 (m, 3H), 3.91-3.87 (m, 4H), 3.36 (s, 3H), 2.26 (brs, 1H), 2.17 (s, 3H). <sup>13</sup>C NMR (100 MHz, CDCl<sub>3</sub>): δ 171.50, 167.90, 145.08, 132.05, 128.92, 127.34, 126.22, 100.38, 60.84, 54.98, 40.19, 9.19. HRMS (ESI): calcd for C<sub>14</sub>H<sub>17</sub>N<sub>2</sub>O<sub>3</sub> [M + H]<sup>+</sup> 261.1239, found 261.1243.

3-butyl-4-((3-hydroxy-3-(thiophen-2-yl)propyl)(methyl)amino)-1-phenyl-1H-pyrrole-2,5-dione

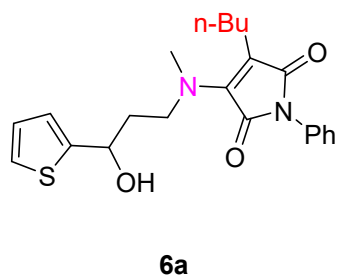

Following the general procedure, using (petroleum ether : EtOAc = 9 : 1) as the eluant afforded a yellow liquid (54.1 mg, 68% yield). <sup>1</sup>H NMR (400 MHz, CDCl<sub>3</sub>): δ 7.48-7.43 (m, 2H), 7.38-7.31 (m, 3H), 7.30-7.28 (m, 1H), 7.03-6.99 (m, 2H), 5.07 (t, *J* = 6.4 Hz, 1H), 3.93 (ddd, *J* = 14.2, 8.1, 7.1 Hz, 1H), 3.75 (ddd, *J* = 13.9, 8.2, 5.3 Hz, 1H), 3.27 (s, 3H), 2.53 (td, *J* = 7.1, 1.9 Hz, 2H), 2.26-2.19 (m, 2H), 1.54-1.47 (m, 2H), 1.46-1.38 (m, 2H), 0.98 (t, *J* = 7.2 Hz, 3H). <sup>13</sup>C NMR (100 MHz, CDCl<sub>3</sub>): δ 171.45, 167.51, 148.04, 144.09, 132.12, 128.86, 127.20, 126.81, 126.19, 124.80, 123.75, 105.62, 67.65, 50.43, 39.77, 37.62, 33.86, 23.26, 22.70, 14.01. HRMS (ESI): calcd for

C<sub>22</sub>H<sub>27</sub>N<sub>2</sub>O<sub>3</sub>S [M + H]<sup>+</sup> 399.1742, found 399.1748.

(R)-3-butyl-4-(2-(hydroxymethyl)pyrrolidin-1-yl)-1-phenyl-1H-pyrrole-2,5-dione

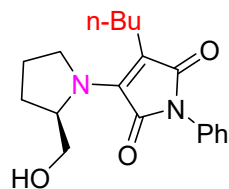

**6b**

Following the general procedure, using (petroleum ether : EtOAc = 9 : 1) as the eluant afforded a yellow liquid (47.2 mg, 72% yield). <sup>1</sup>H NMR (400 MHz, CDCl<sub>3</sub>): δ 7.47-7.43 (m, 2H), 7.38-7.31 (m, 3H), 4.88-4.83 (m, 1H), 3.94-3.90 (m, 1H), 3.72-3.55 (m, 3H), 2.63-2.56 (m, 1H), 2.51-2.44 (m, 1H), 2.07-1.98 (m, 5H), 1.55-1.39 (m, 4H), 0.97 (t, *J* = 7.2 Hz, 3H). <sup>13</sup>C NMR (100 MHz, CDCl<sub>3</sub>): δ 171.67, 167.59, 142.15, 132.23, 128.84, 127.14, 126.18, 103.26, 65.25, 61.11, 50.62, 34.51, 27.77, 23.18, 23.05, 22.69, 14.02. HRMS (ESI): calcd for C<sub>19</sub>H<sub>25</sub>N<sub>2</sub>O<sub>3</sub> [M + H]<sup>+</sup> 329.1865, found 329.1870.

3-(4-(benzo[d]isothiazol-3-yl)piperazin-1-yl)-4-butyl-1-phenyl-1H-pyrrole-2,5-dione

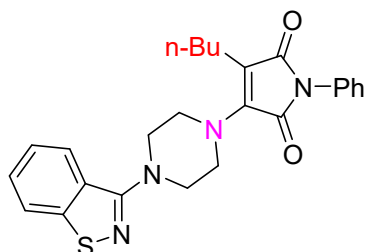

**6c**

Following the general procedure, using (petroleum ether : EtOAc = 9 : 1) as the eluant afforded a yellow solid (61.6 mg, 69% yield), Mp = 59-60°C. <sup>1</sup>H NMR (400 MHz, CDCl<sub>3</sub>): δ 7.96 (d, *J* = 8.2 Hz, 1H), 7.88 (d, *J* = 8.2 Hz, 1H), 7.56-7.52 (m, 1H), 7.46 (q, *J* = 7.4, 7.0 Hz, 3H), 7.42-7.33 (m, 3H), 4.01-3.99 (m, 4H), 3.73-3.71 (m, 4H), 2.58-2.54 (m, 2H), 1.61-1.55 (m, 2H), 1.49-1.44 (m, 2H), 1.00 (t, *J* = 7.2 Hz, 3H). <sup>13</sup>C NMR (100 MHz, CDCl<sub>3</sub>): δ 171.27, 167.44, 163.38, 152.99, 143.66, 132.07, 128.91, 127.86, 127.27, 126.13, 124.24, 123.70, 120.78, 108.96, 50.35, 48.41, 32.67, 23.43, 22.83, 13.97. HRMS (ESI): calcd for C<sub>25</sub>H<sub>27</sub>N<sub>4</sub>O<sub>2</sub>S [M + H]<sup>+</sup> 447.1855, found 447.1850.

## References:

(1) (a) Ding, G.; Li, C.; Shen, Y.; Lu, B.; Zhang, Z.; Xie, X. *Adv. Synth. Catal.* **2016**, *358*, 1241-1250. (b) Matuszak, N.; Muccioli, G. G.; Labar, G.; Lambert, D. M. *J. Med Chem.* **2009**, *52*, 7410-7420.

(2) K. Takahashi, Y. Ogiwara, N. Sakai, *Chem. Asian J.* 2018, *13*, 809.

# $^1\text{H}$ , $^{13}\text{C}$ and $^{19}\text{F}$ NMR spectra of products

wg176. 1. 1. 1r

7.48  
7.46  
7.45  
7.44  
7.38  
7.36  
7.34  
7.33  
7.32

3.87  
3.85  
3.84  
3.78  
3.76  
3.75

2.52  
2.50  
2.48  
1.58  
1.55  
1.54  
1.53  
1.52  
1.51  
1.50  
1.48  
1.44  
1.43  
1.41  
1.39  
1.00  
0.99  
0.97

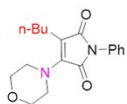

**3a**  
 $^1\text{H}$  NMR (400 MHz,  $\text{CDCl}_3$ )

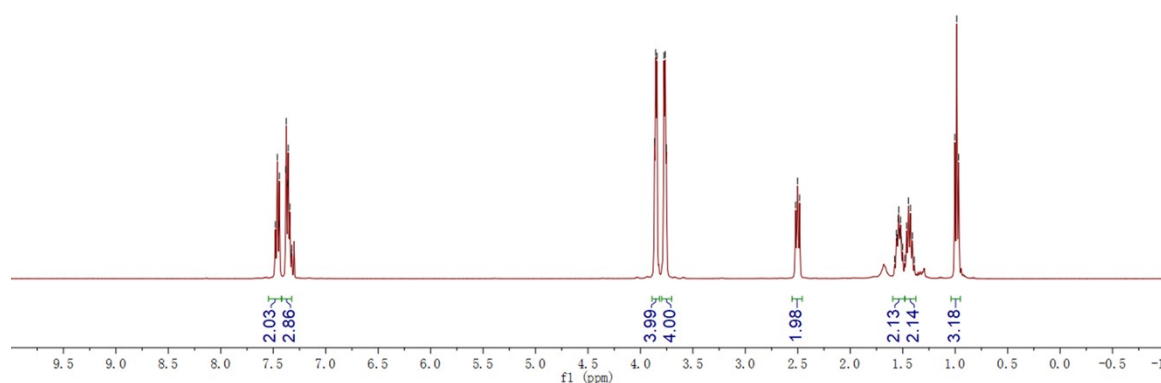

wg176. 2. 1. 1r

171.21  
167.37

143.54  
132.02  
128.90  
127.28  
126.09

108.97

67.03

48.93

32.76

23.27  
22.77

13.94

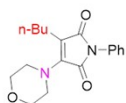

**3a**  
 $^{13}\text{C}$  NMR (100 MHz,  $\text{CDCl}_3$ )

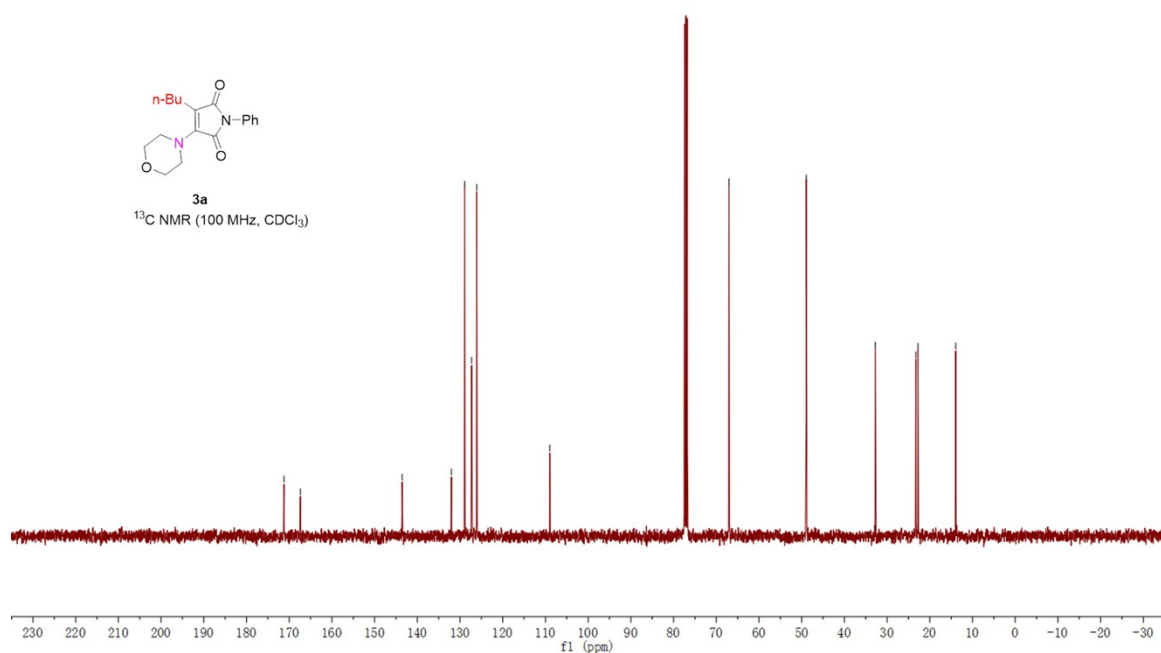

wg981.1.1.1r

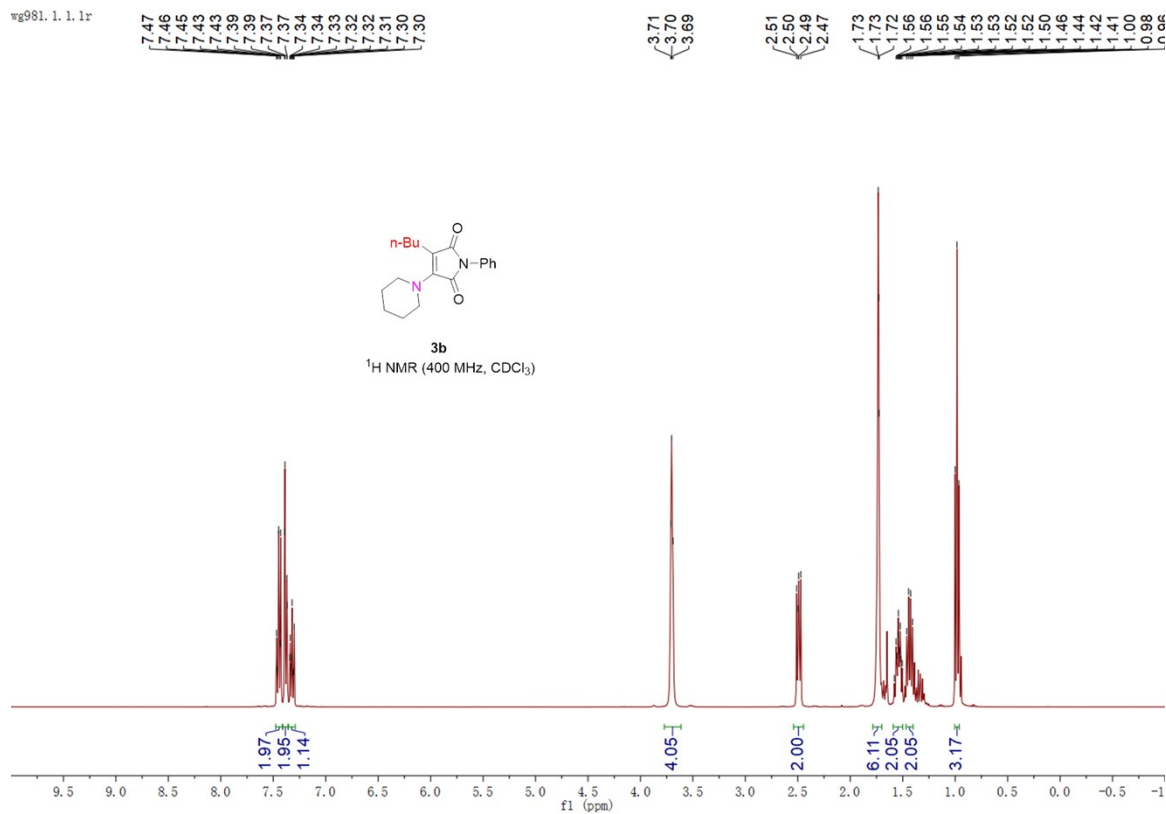

pdata/1

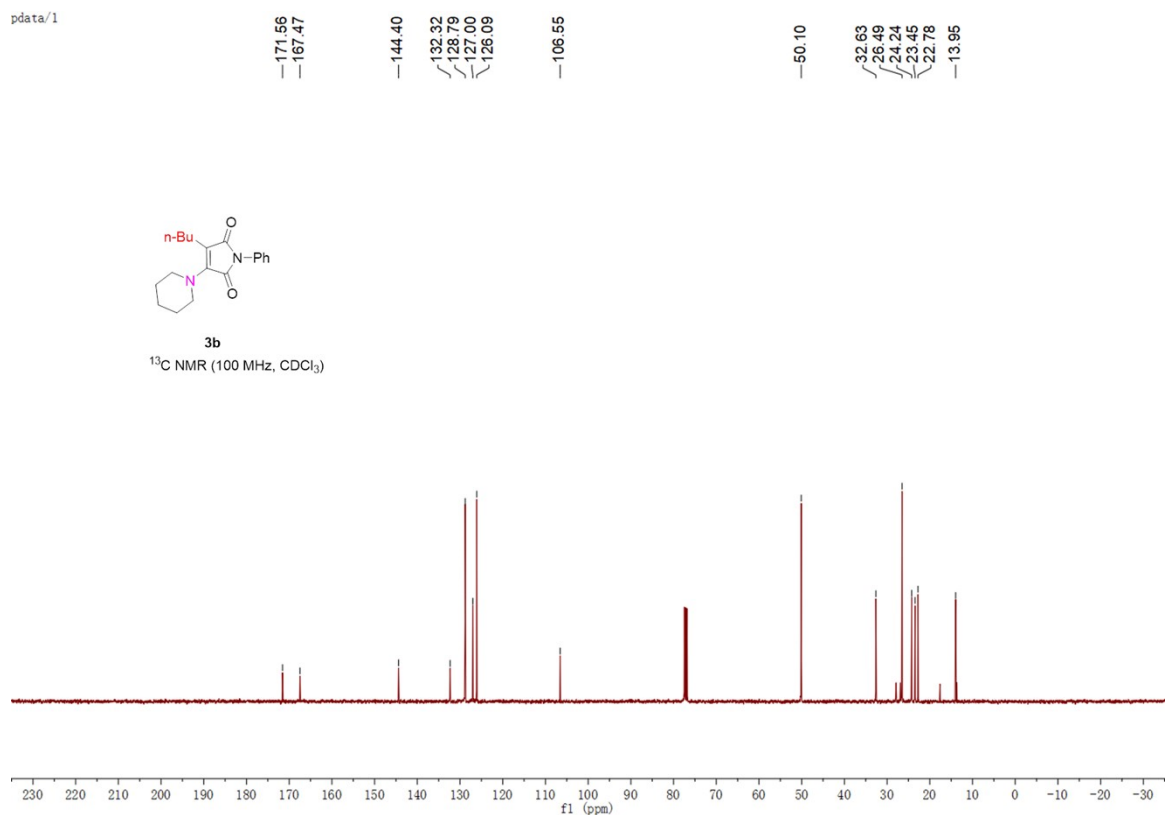



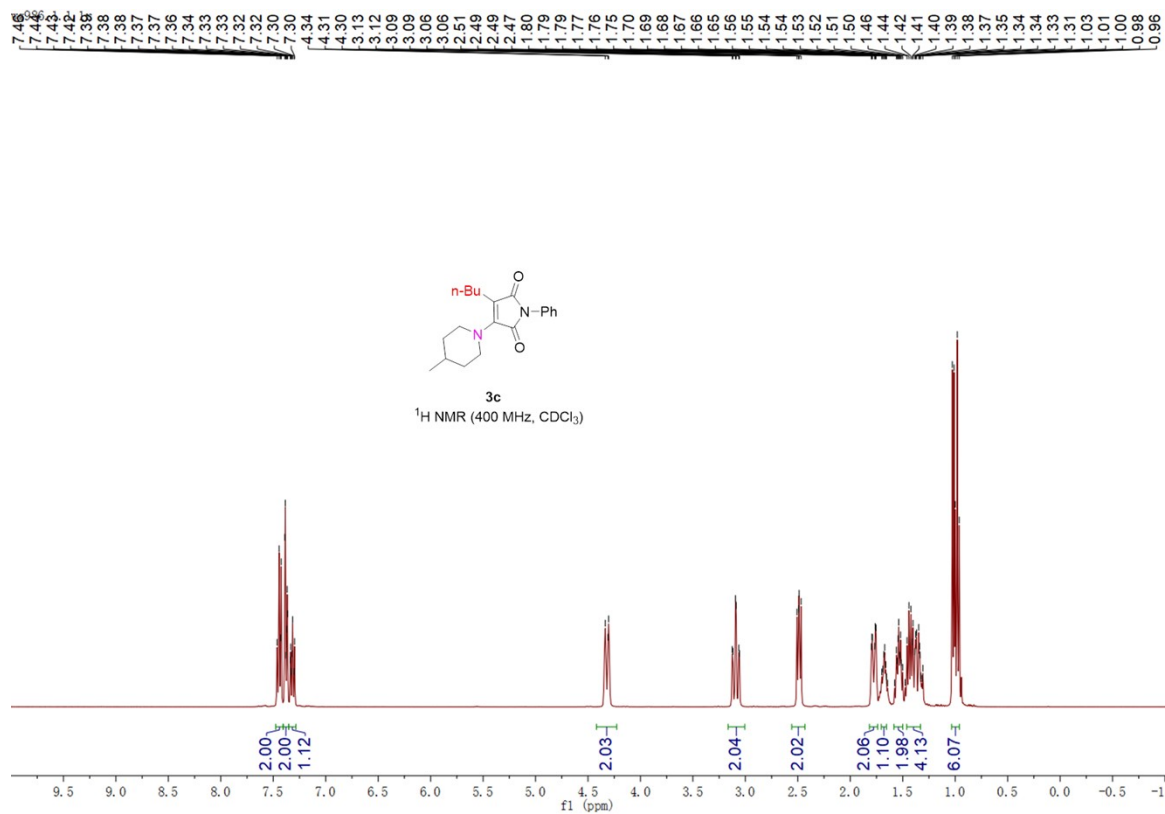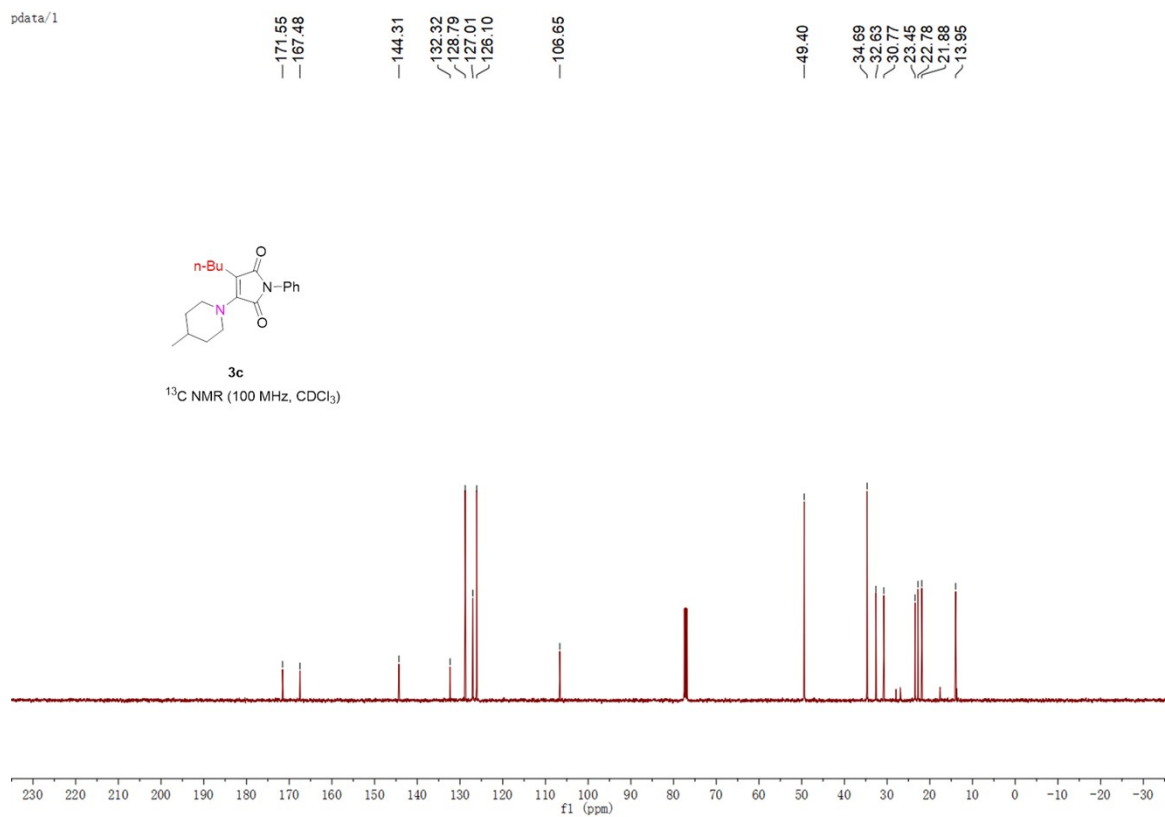

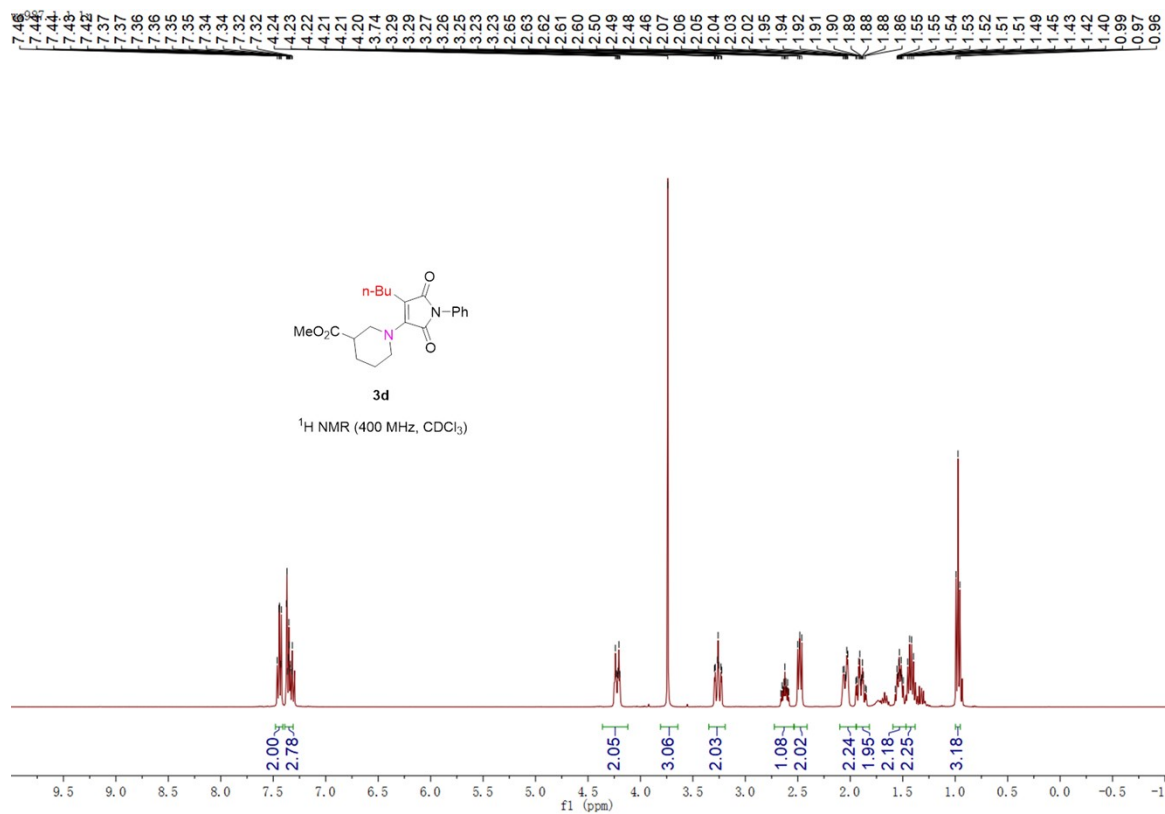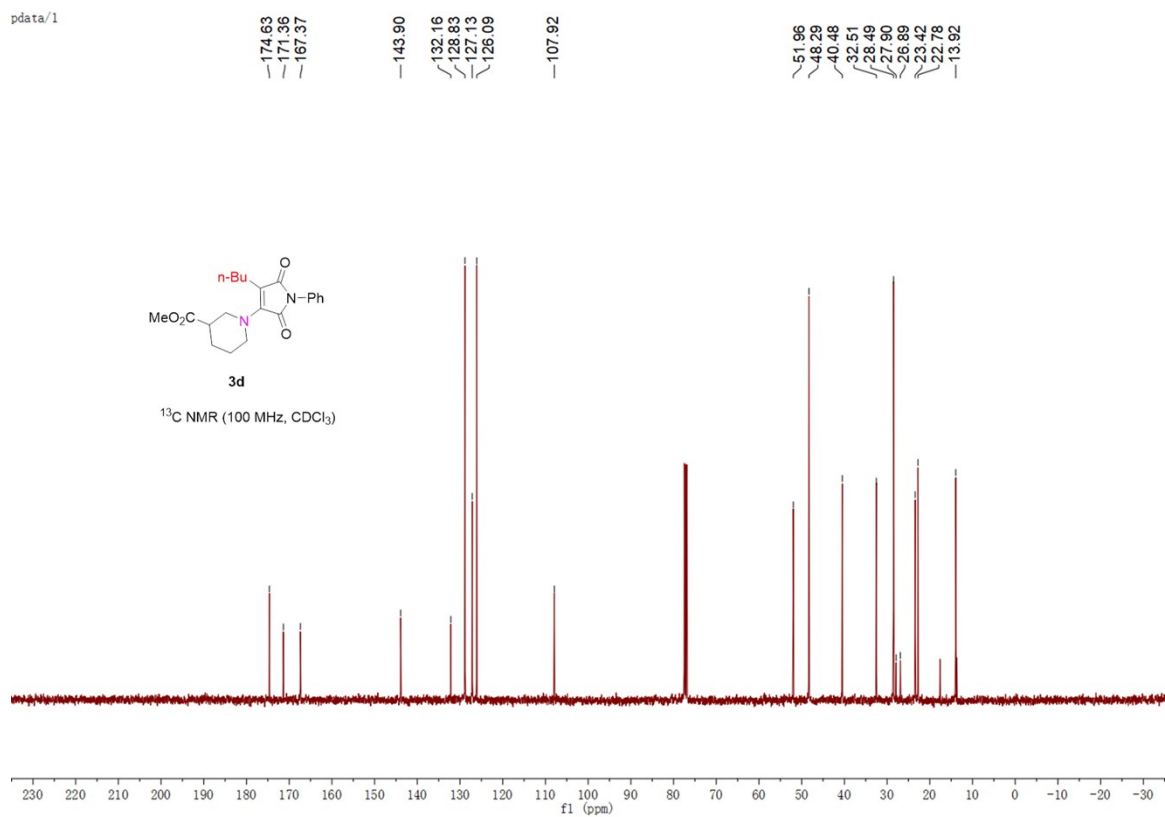

wg996.1.1.1r

7.47  
7.45  
7.43  
7.39  
7.38  
7.37  
7.34  
7.33  
7.31

3.81  
3.80  
3.78  
2.52  
2.50  
2.48  
1.87  
1.86  
1.85  
1.84  
1.70  
1.69  
1.68  
1.67  
1.66  
1.65  
1.65  
1.63  
1.53  
1.52  
1.51  
1.50  
1.49  
1.49  
1.47  
1.47  
1.45  
1.43  
1.42  
1.41  
1.40  
1.38  
1.38  
0.97  
0.96

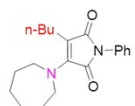

3e

<sup>1</sup>H NMR (400 MHz, CDCl<sub>3</sub>)

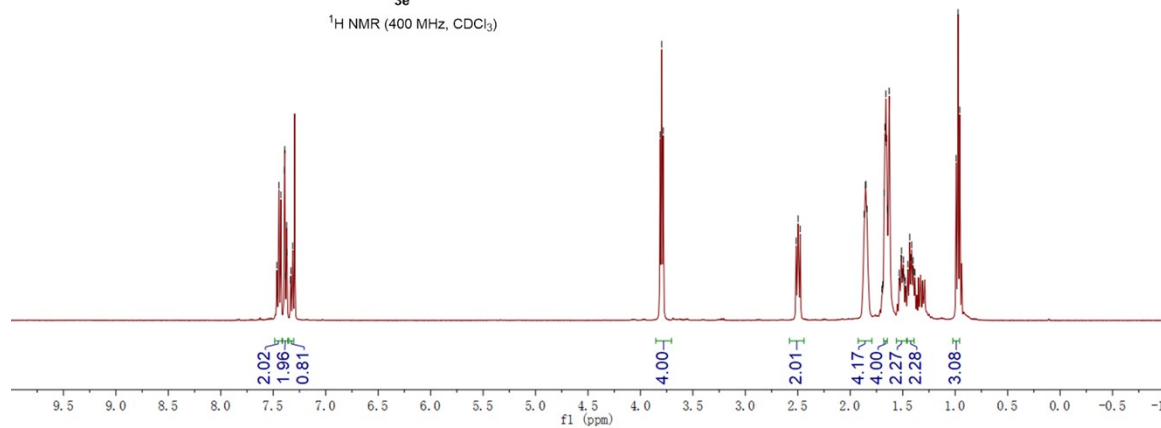

pdata/1

171.72  
167.03

143.35  
132.39  
128.77  
126.95  
126.15

102.51

52.07

33.77  
29.01  
26.84  
23.59  
22.67  
13.99

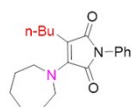

3e

<sup>13</sup>C NMR (100 MHz, CDCl<sub>3</sub>)

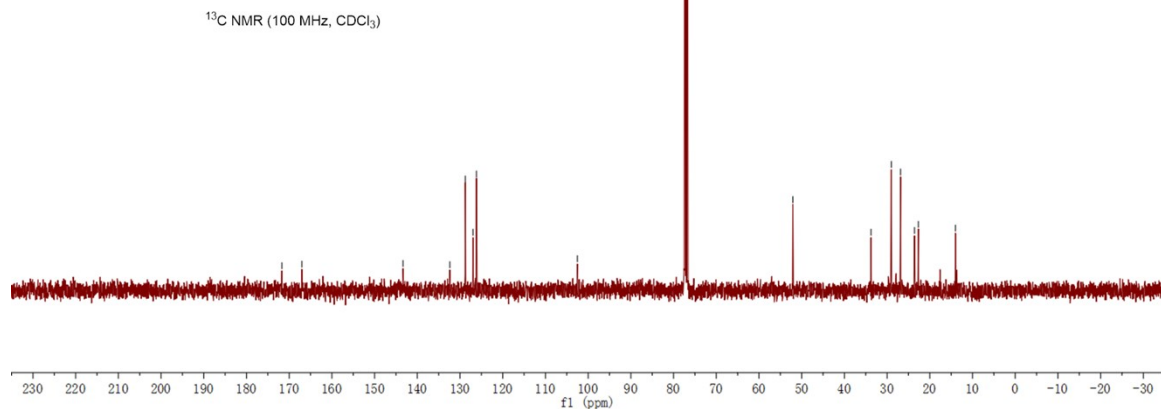

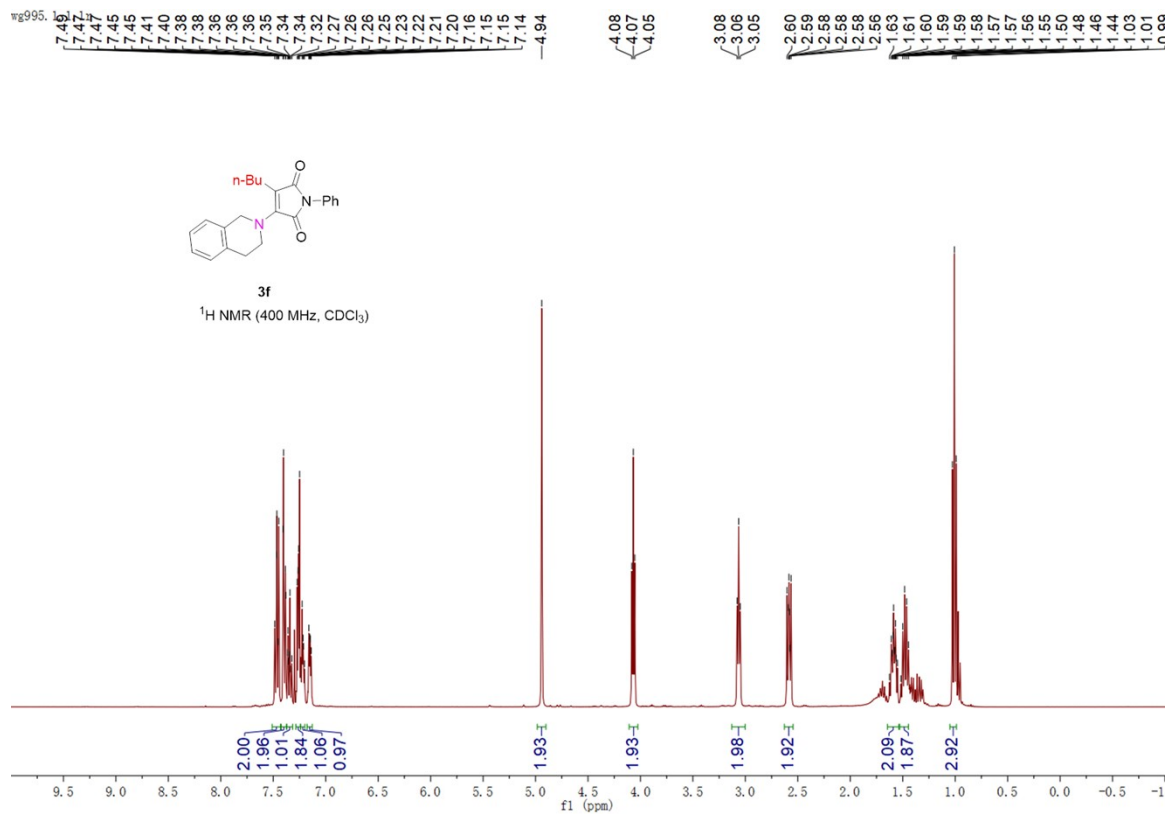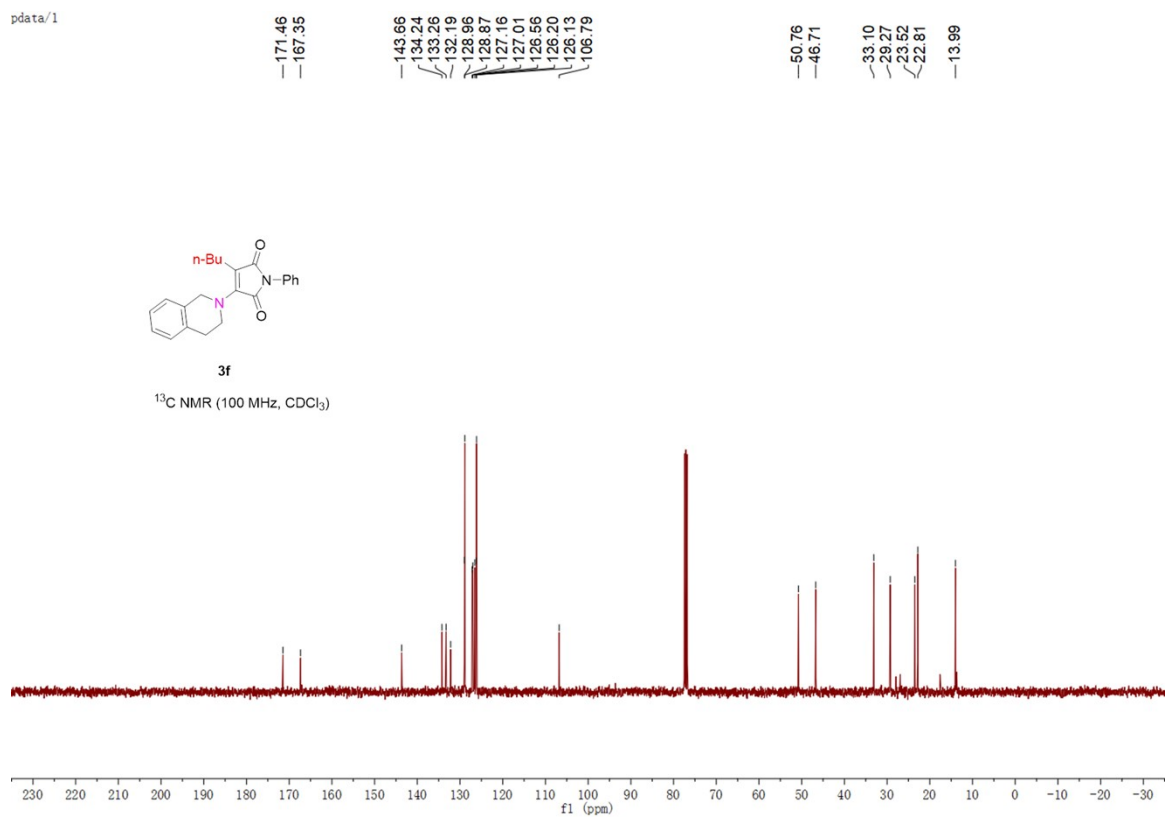

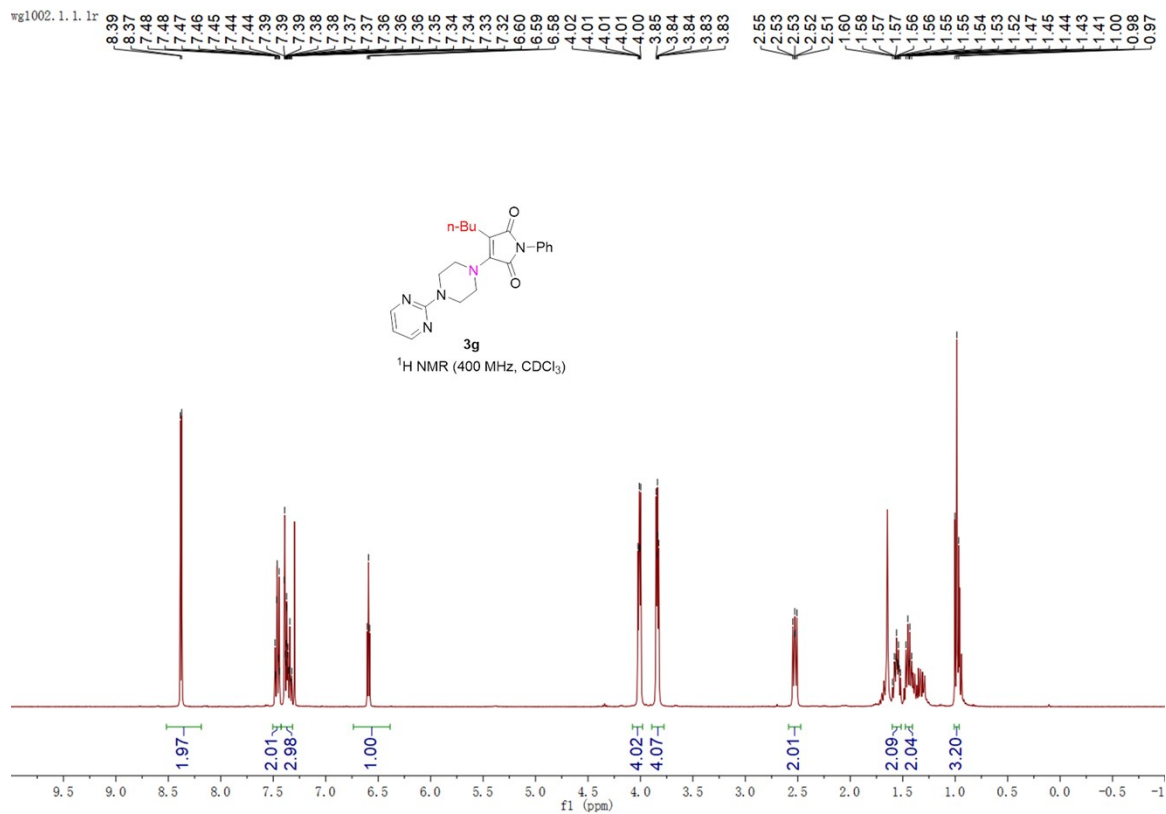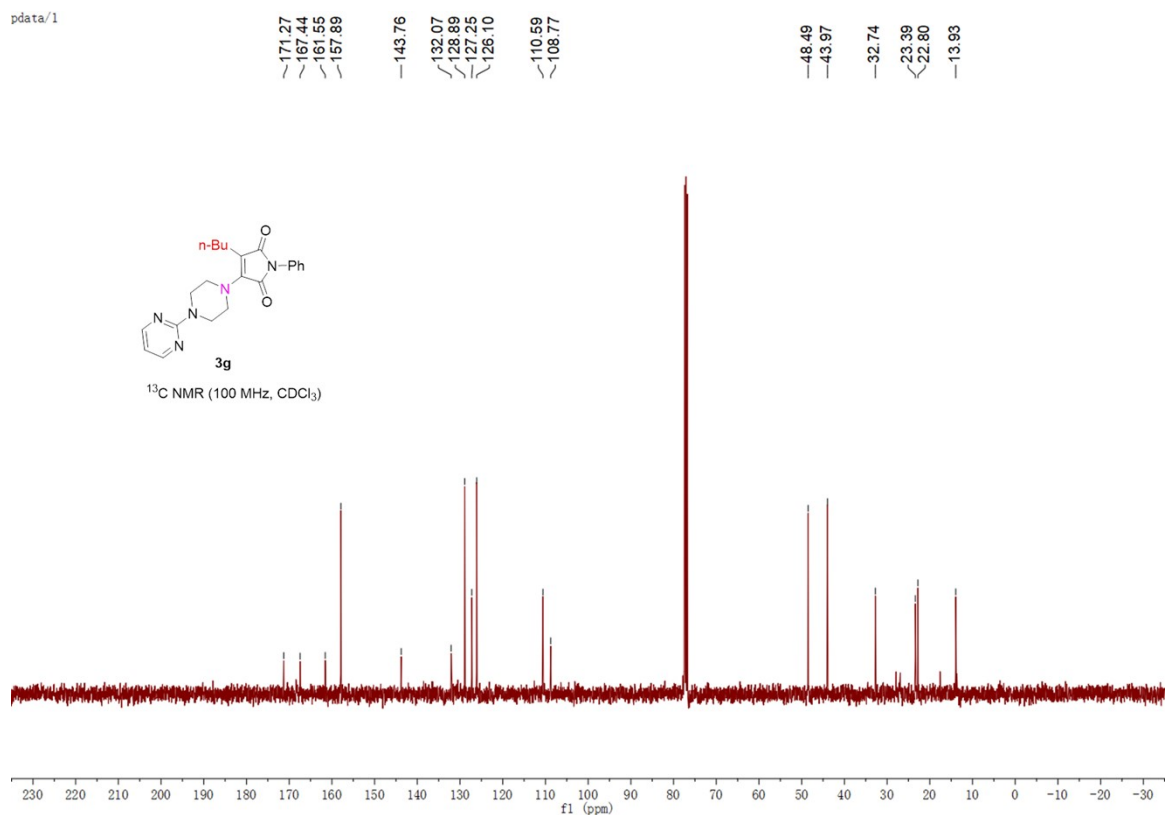

wg967.1.1.1r

7.47  
7.46  
7.45  
7.44  
7.43  
7.43  
7.42  
7.40  
7.39  
7.38  
7.38  
7.37  
7.33  
7.33  
7.33  
7.32  
7.31

-4.72

3.88  
3.87  
3.87  
3.86  
3.85

2.56  
2.55  
2.54  
2.52

2.00  
1.99  
1.98  
1.97

1.55  
1.54  
1.53  
1.53  
1.52  
1.51  
1.51  
1.48  
1.48  
1.42  
1.41  
1.40  
1.40  
0.99  
0.98

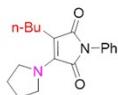

3h

<sup>1</sup>H NMR (400 MHz, CDCl<sub>3</sub>)

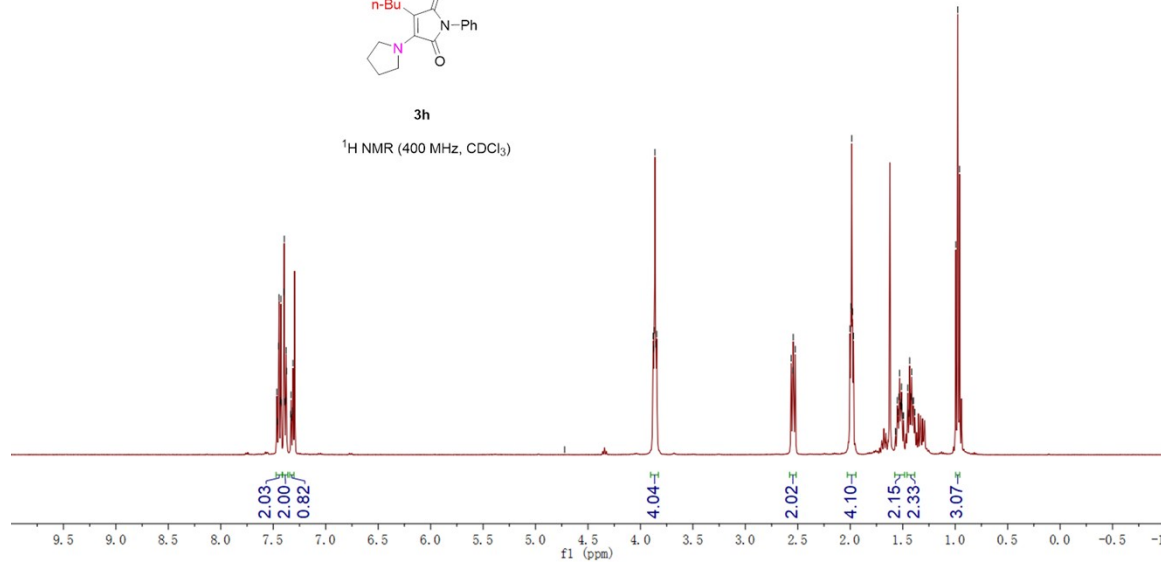

pdata/1

-172.02  
-166.94

-142.16  
-132.49  
-128.77  
-128.87  
-126.07

-101.37

-50.44

-34.84  
-25.40  
-22.89  
-22.68  
-14.04

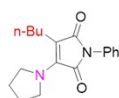

3h

<sup>13</sup>C NMR (100 MHz, CDCl<sub>3</sub>)

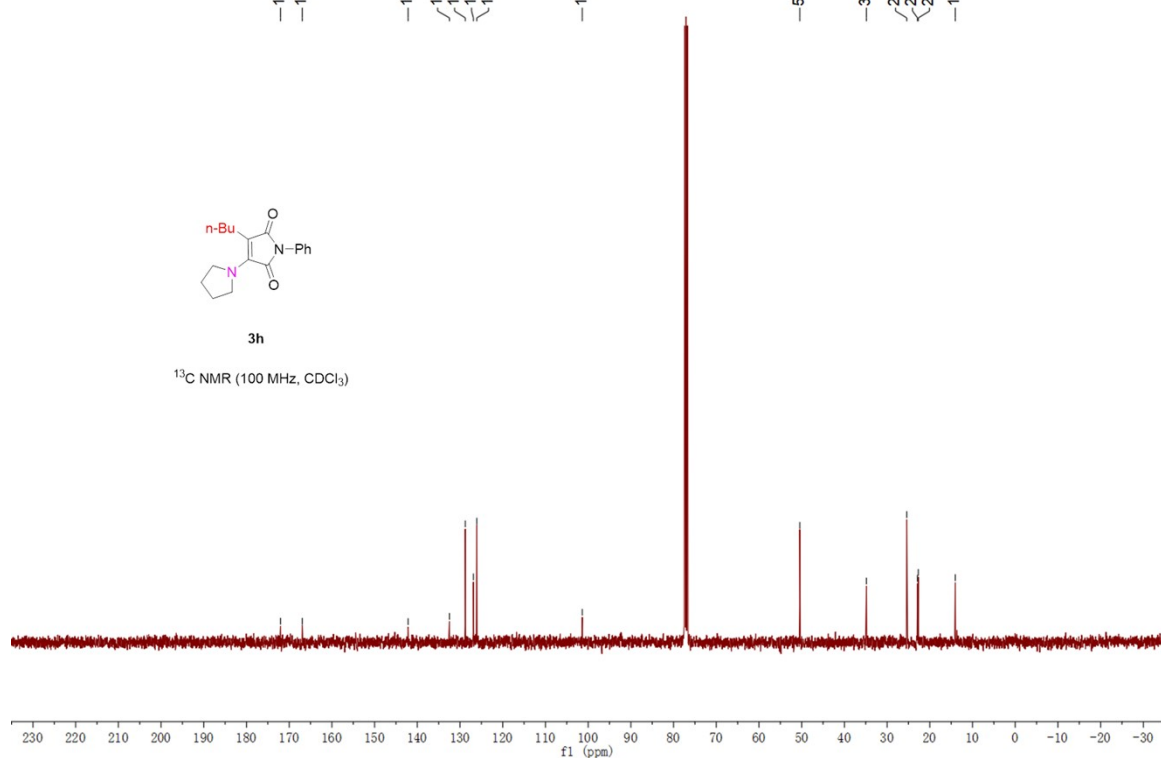

wg1007.1.1.1r

7.47  
7.45  
7.45  
7.44  
7.43  
7.43  
7.40  
7.39  
7.38  
7.37  
7.37  
7.34  
7.34  
7.33  
7.32

3.60  
3.58  
3.56  
2.46  
2.44  
2.44  
2.44  
2.42  
2.42  
1.68  
1.68  
1.67  
1.67  
1.66  
1.65  
1.64  
1.64  
1.63  
1.63  
1.61  
1.53  
1.53  
1.51  
1.51  
1.50  
1.50  
1.49  
1.49  
1.49  
1.47  
1.46  
1.46  
1.44  
1.42  
1.40  
1.38  
1.36  
1.34  
1.02  
1.00  
0.98

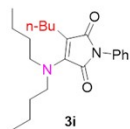

<sup>1</sup>H NMR (400 MHz, CDCl<sub>3</sub>)

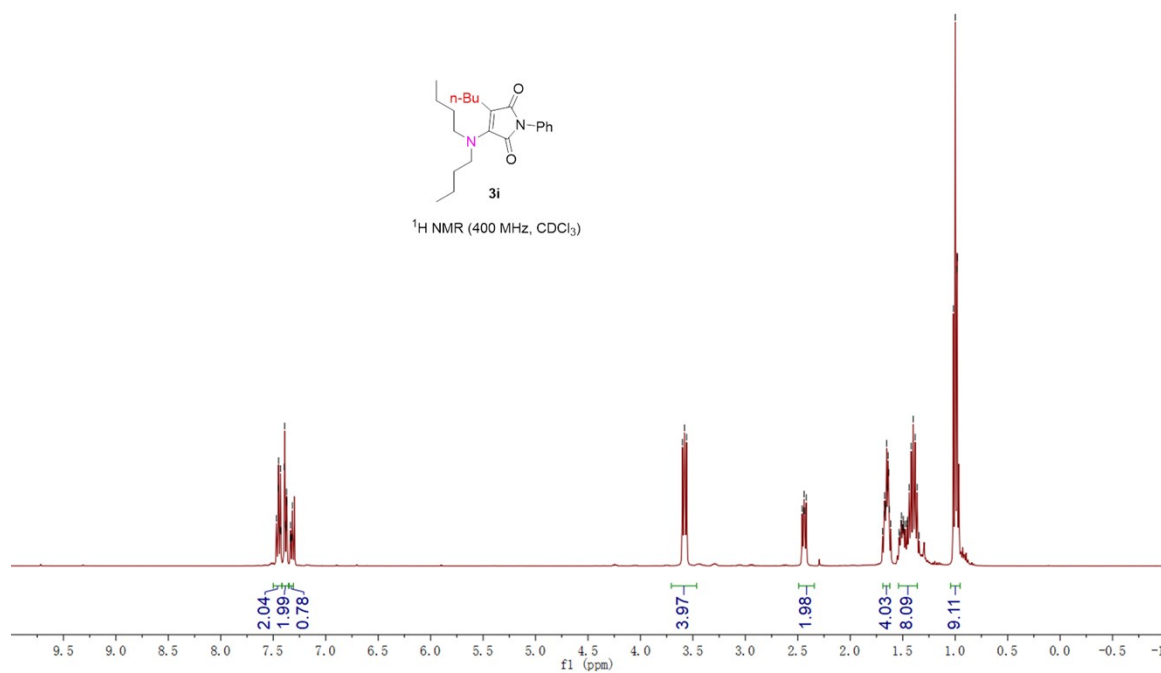

pdata/1

171.58  
167.23

142.95  
132.39  
128.80  
128.97  
126.19

103.21

51.76

33.52  
31.24  
23.46  
22.73  
18.94  
14.01  
13.97

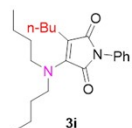

<sup>13</sup>C NMR (100 MHz, CDCl<sub>3</sub>)

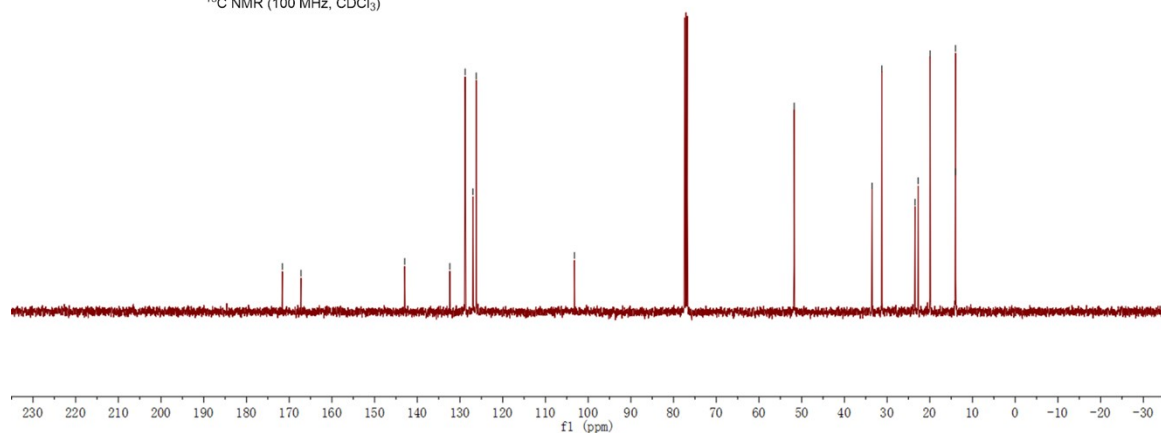

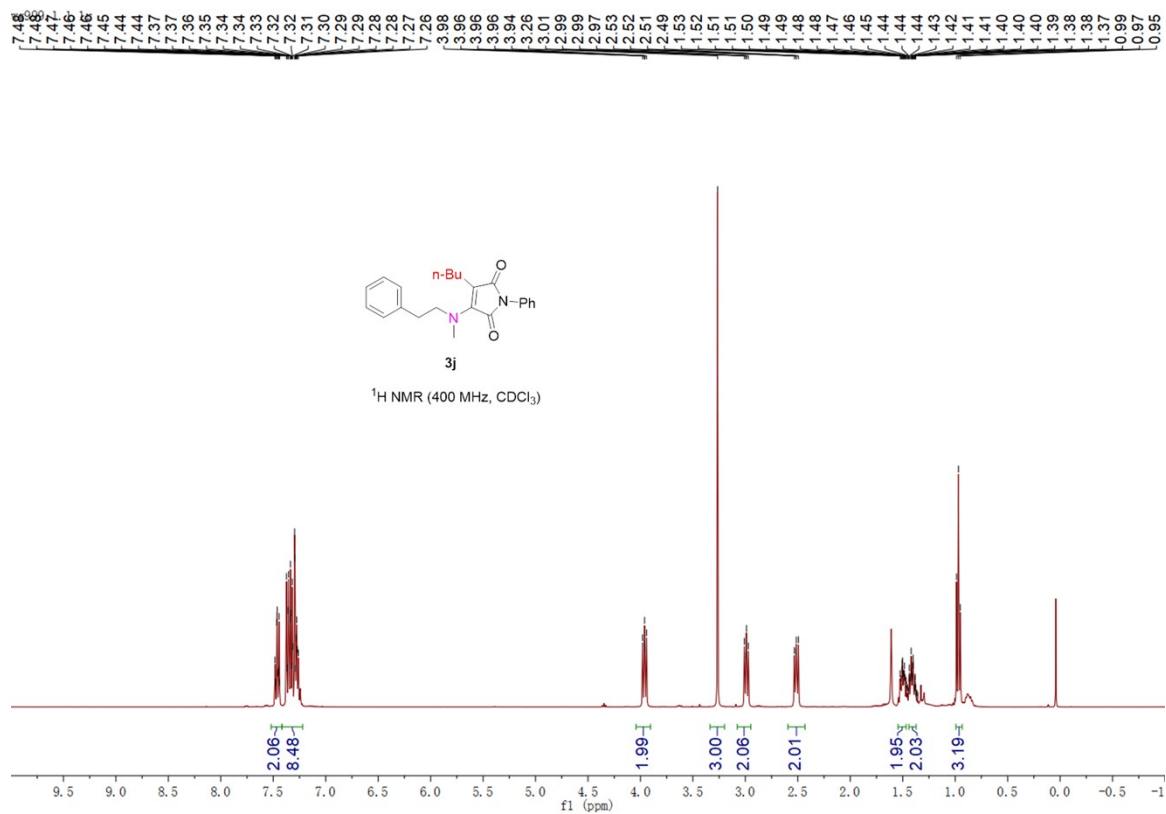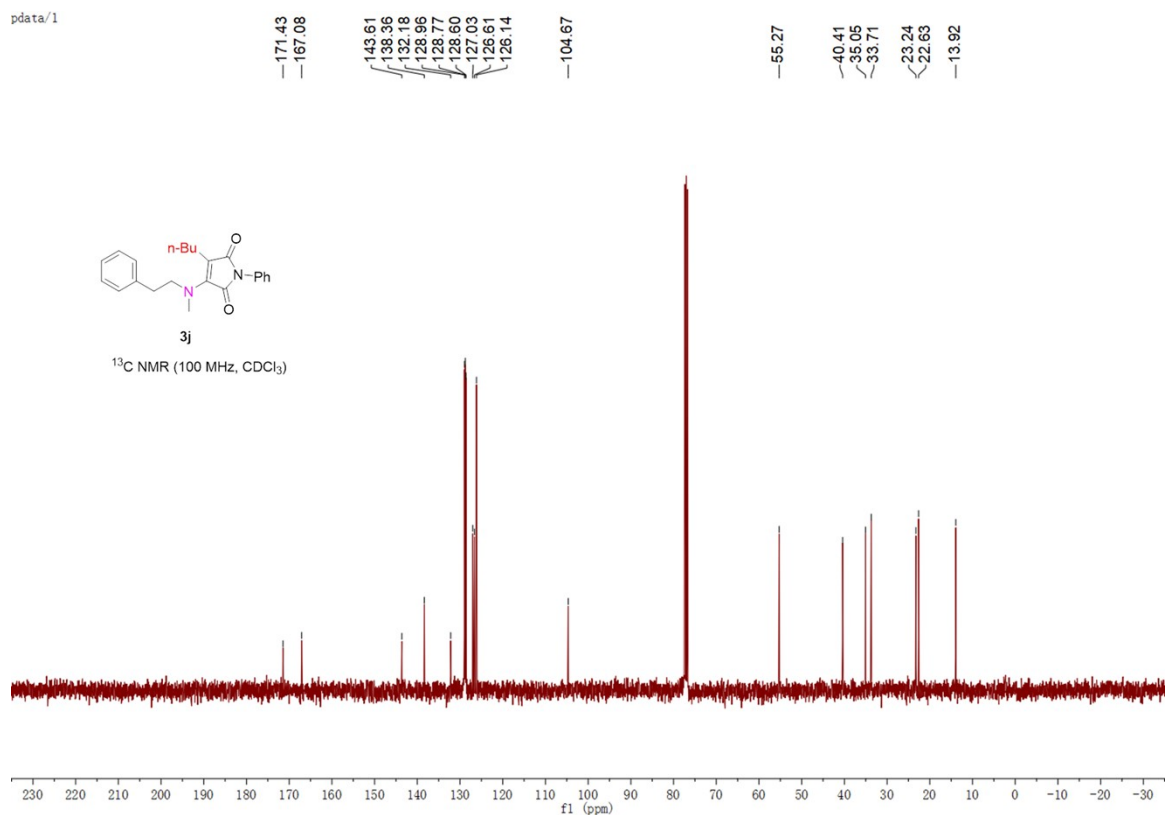



wg1000.1.1.1r

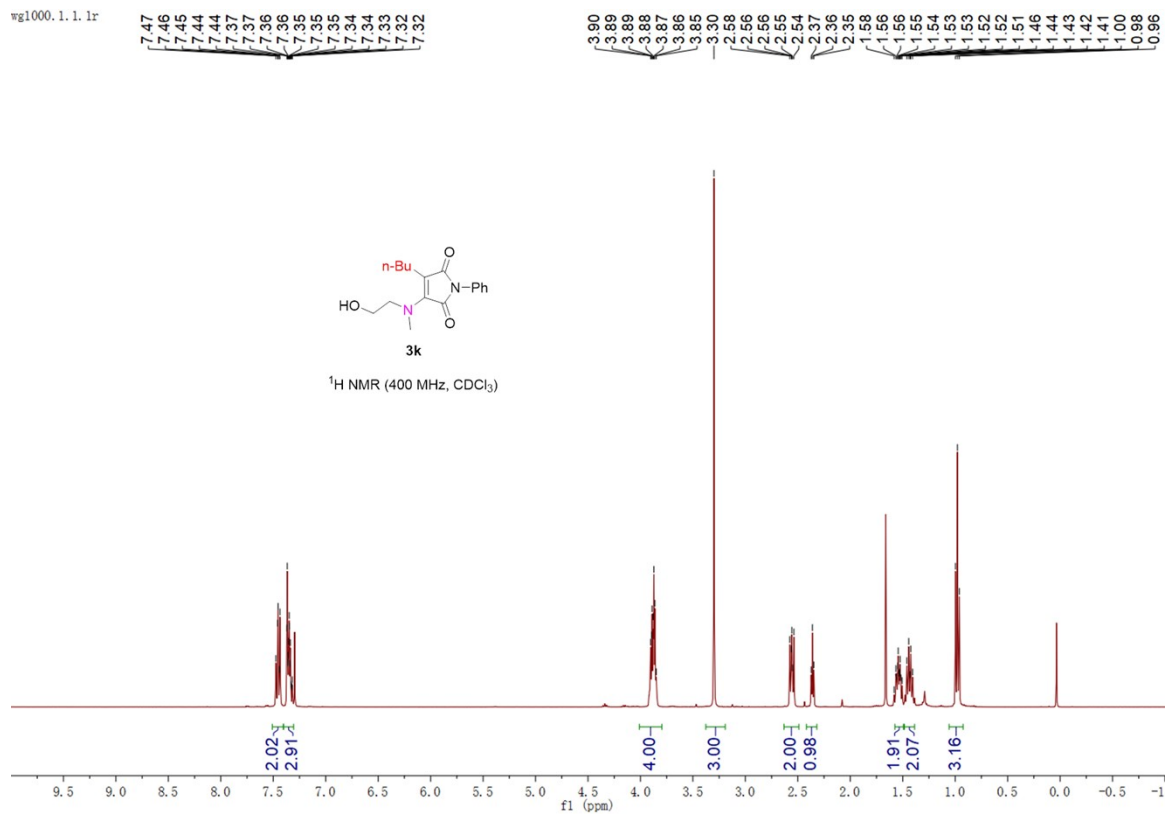

pdata/1

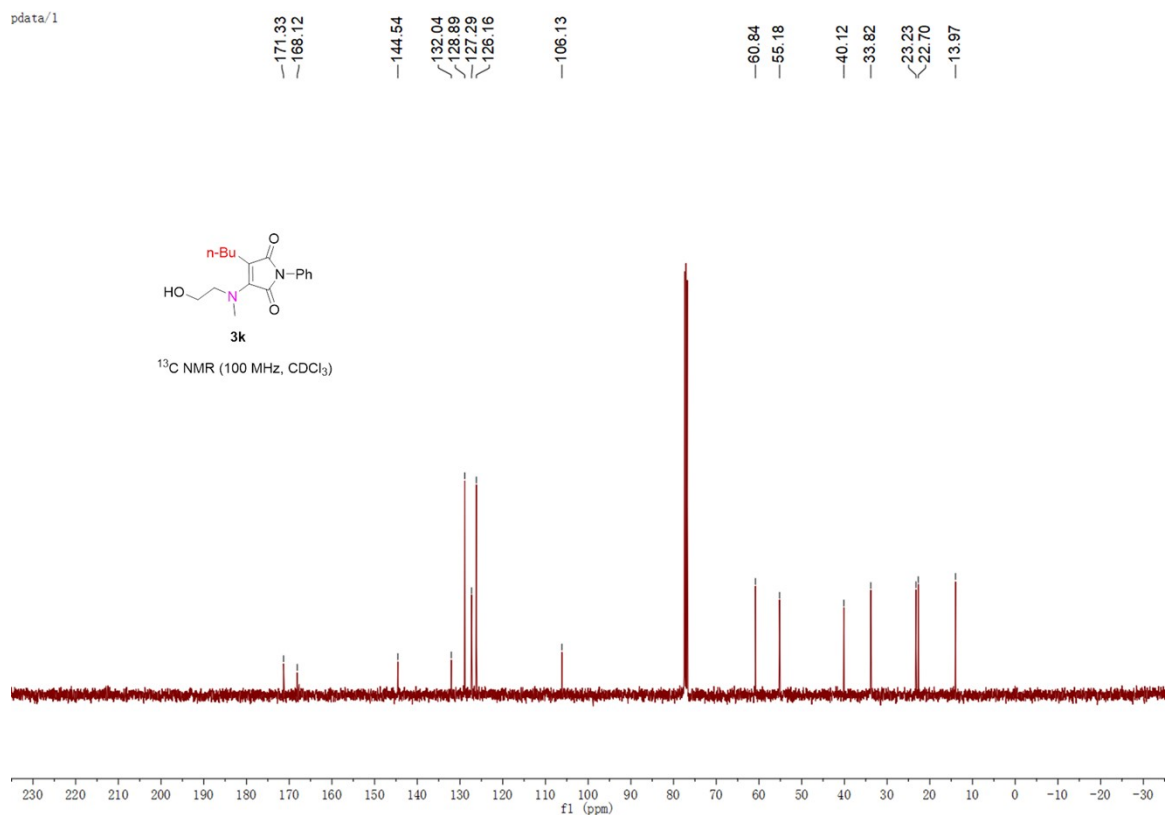

wg1126.1.1.1r

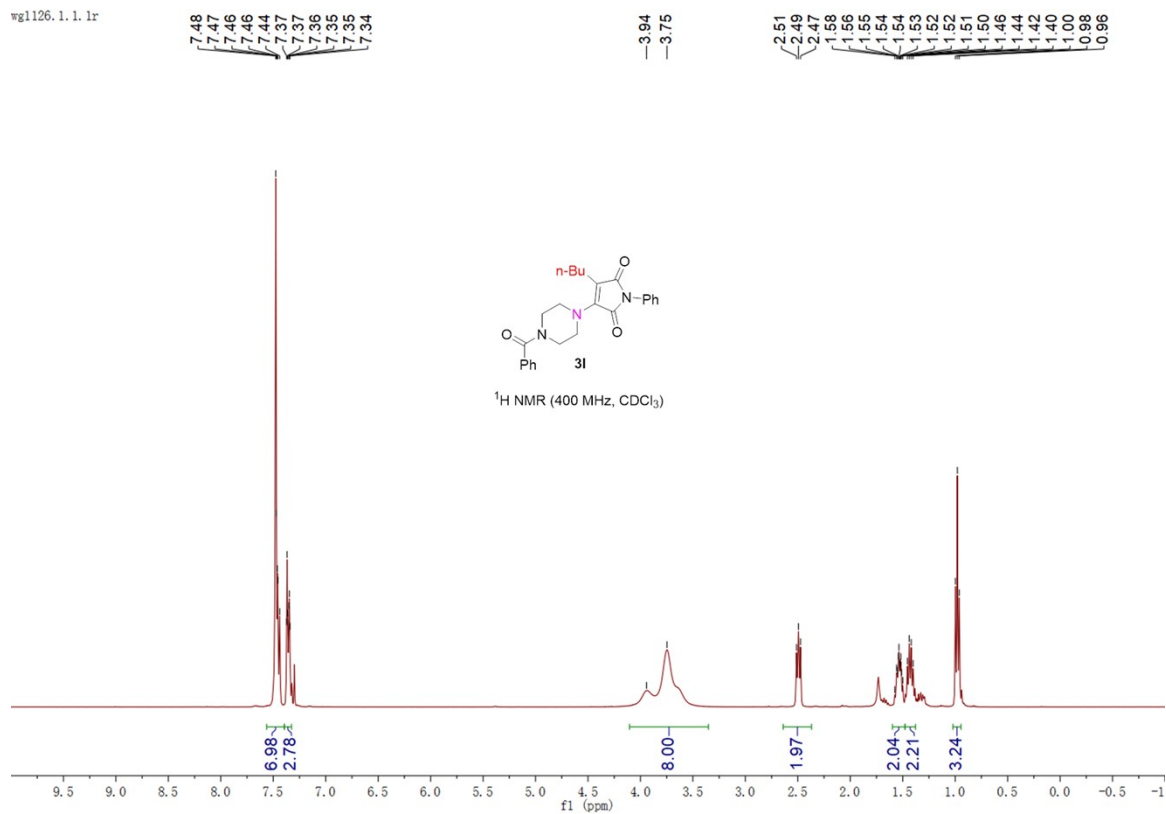

pdata/1

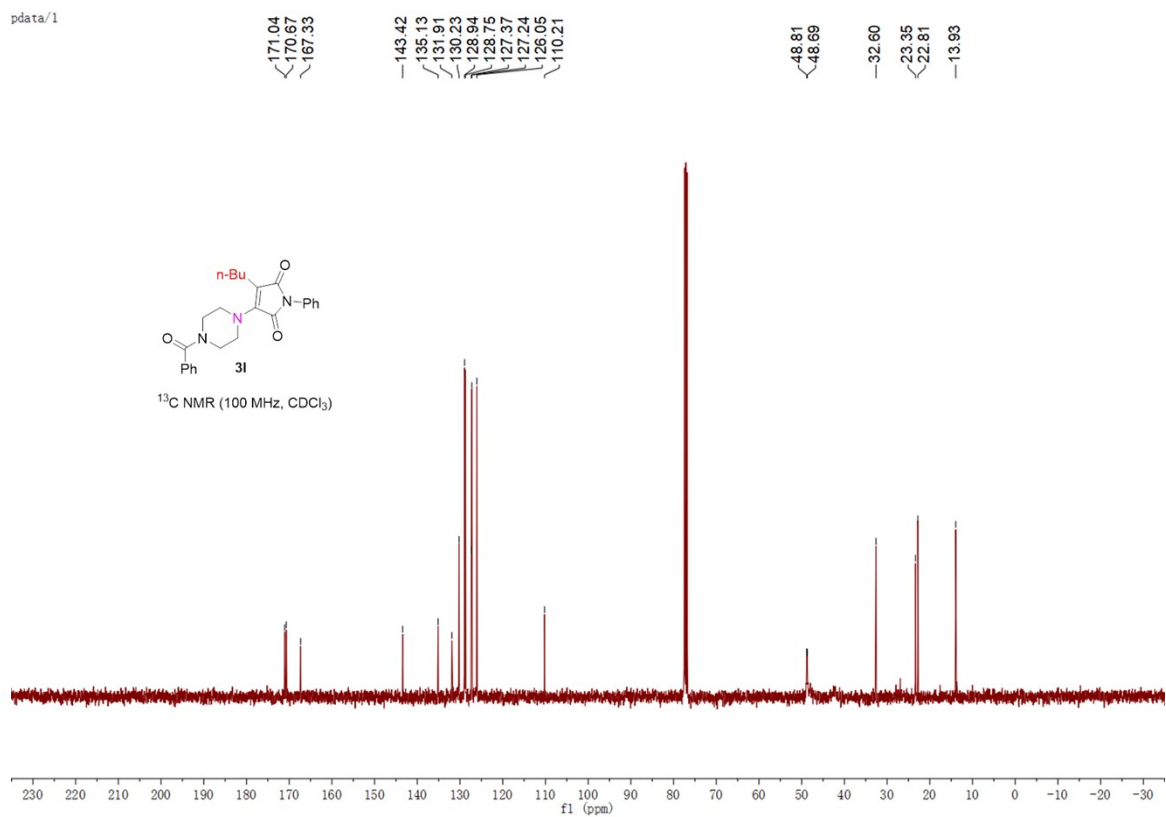

wg937.1.1.1r

7.99  
7.99  
7.37  
7.37  
7.36  
7.36  
7.35  
7.34  
7.34  
7.33  
7.32  
7.31  
7.30  
7.30  
7.29

4.63

3.82  
3.80  
3.79  
3.70  
3.69  
3.68

2.43  
2.41  
2.39

1.48  
1.47  
1.46  
1.45  
1.45  
1.44  
1.43  
1.43  
1.42  
1.41  
1.40  
1.40  
1.39  
1.38  
1.35  
1.35  
0.97  
0.96  
n.d.

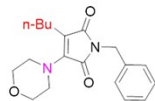

4a

<sup>1</sup>H NMR (400 MHz, CDCl<sub>3</sub>)

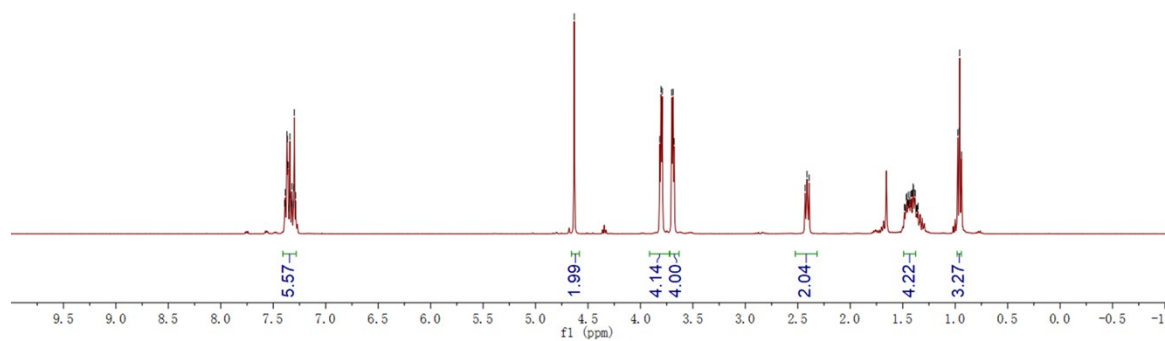

pdata/1

172.20  
168.51

143.67  
137.00  
128.63  
128.50  
127.61

108.50

66.96

48.71

41.34

32.89

23.17  
22.75

13.92

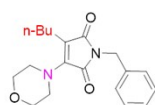

4a

<sup>13</sup>C NMR (100 MHz, CDCl<sub>3</sub>)

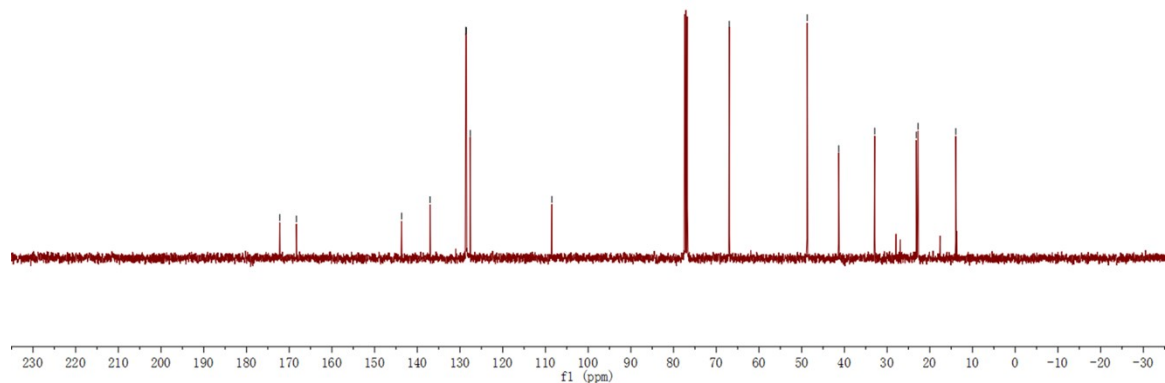



wg949.1.1.1r

7.37  
7.35  
7.34  
7.33  
7.03  
7.01  
6.99

4.59  
3.81  
3.80  
3.79  
3.70  
3.69  
3.67

2.42  
2.40  
2.38  
1.47  
1.46  
1.45  
1.44  
1.43  
1.43  
1.42  
1.41  
1.39  
1.38  
1.37  
1.37  
0.95  
n.a.

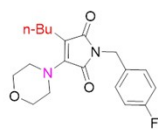

4c

<sup>1</sup>H NMR (400 MHz, CDCl<sub>3</sub>)

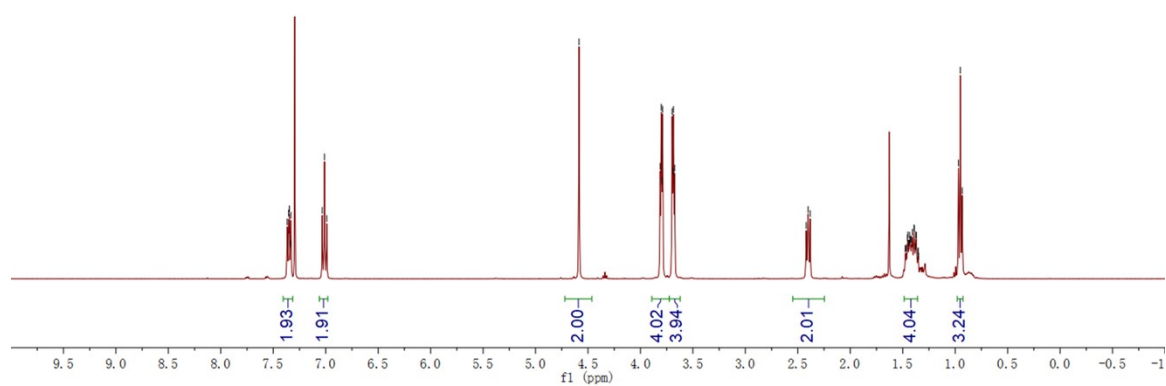

pdata/1

172.12  
168.25  
163.51  
161.07

143.69  
132.82  
130.41  
130.33

115.57  
115.38  
108.45

66.94

48.71

40.61

32.88

23.16  
22.74

13.90

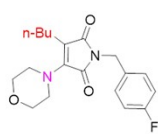

4c

<sup>13</sup>C NMR (100 MHz, CDCl<sub>3</sub>)

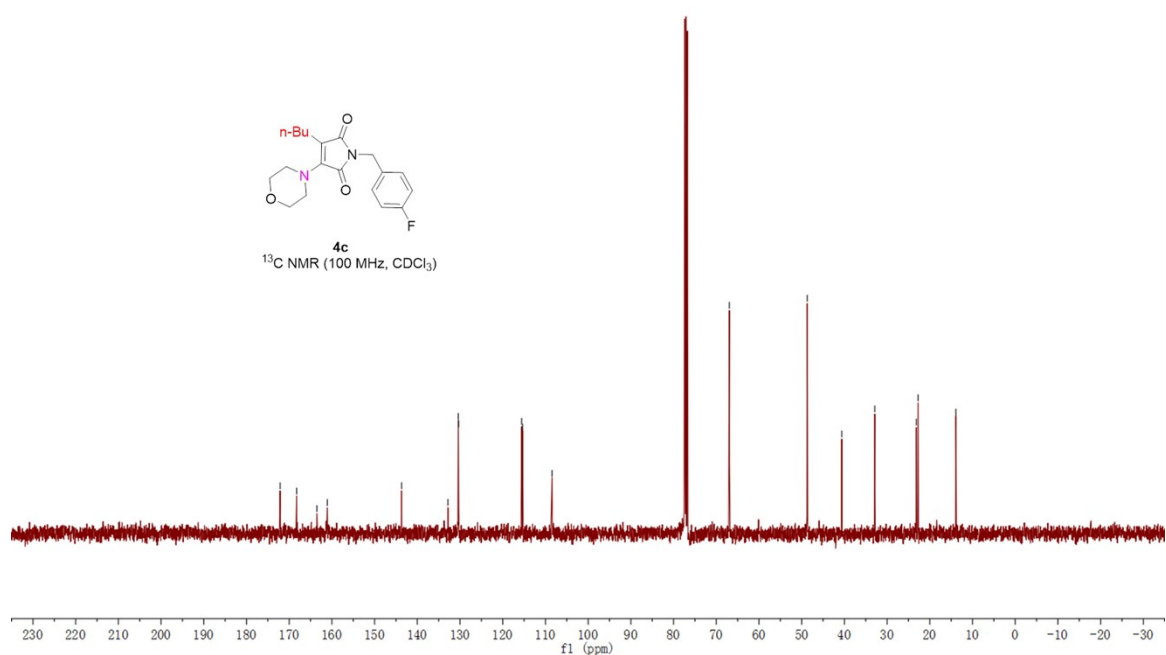

pdata/1

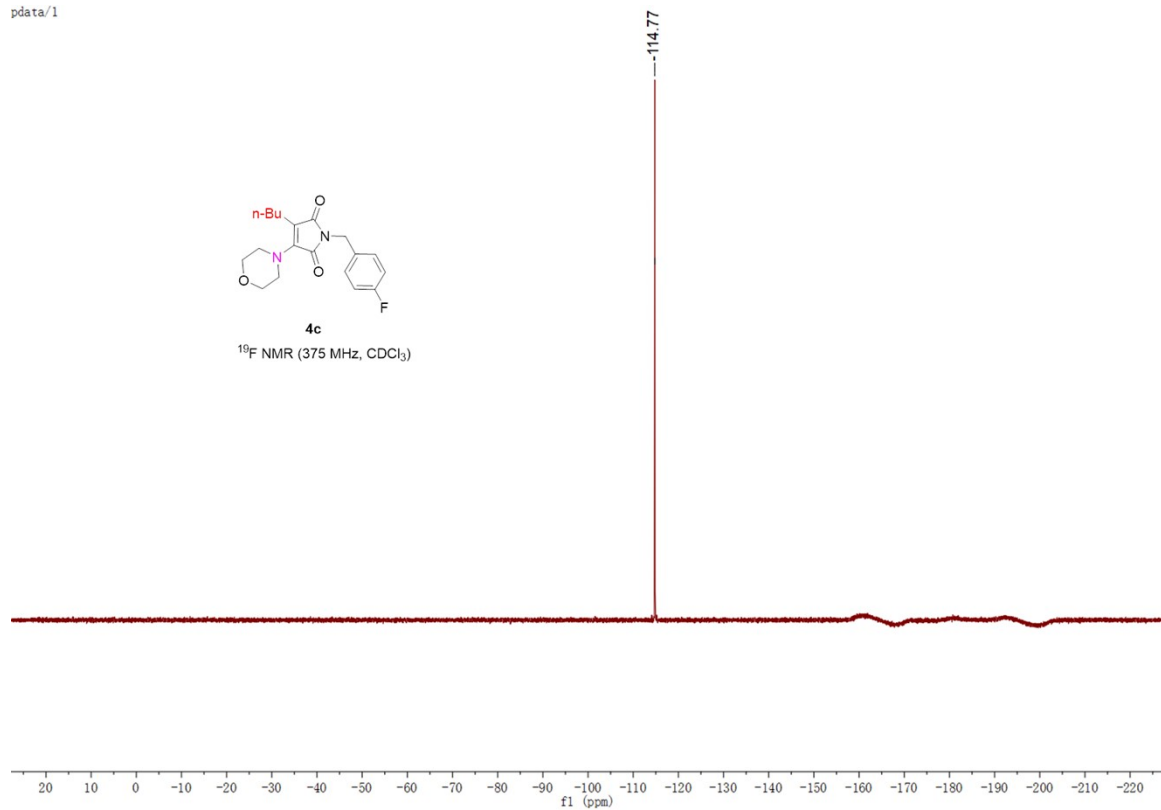

wg950.1.1.1r

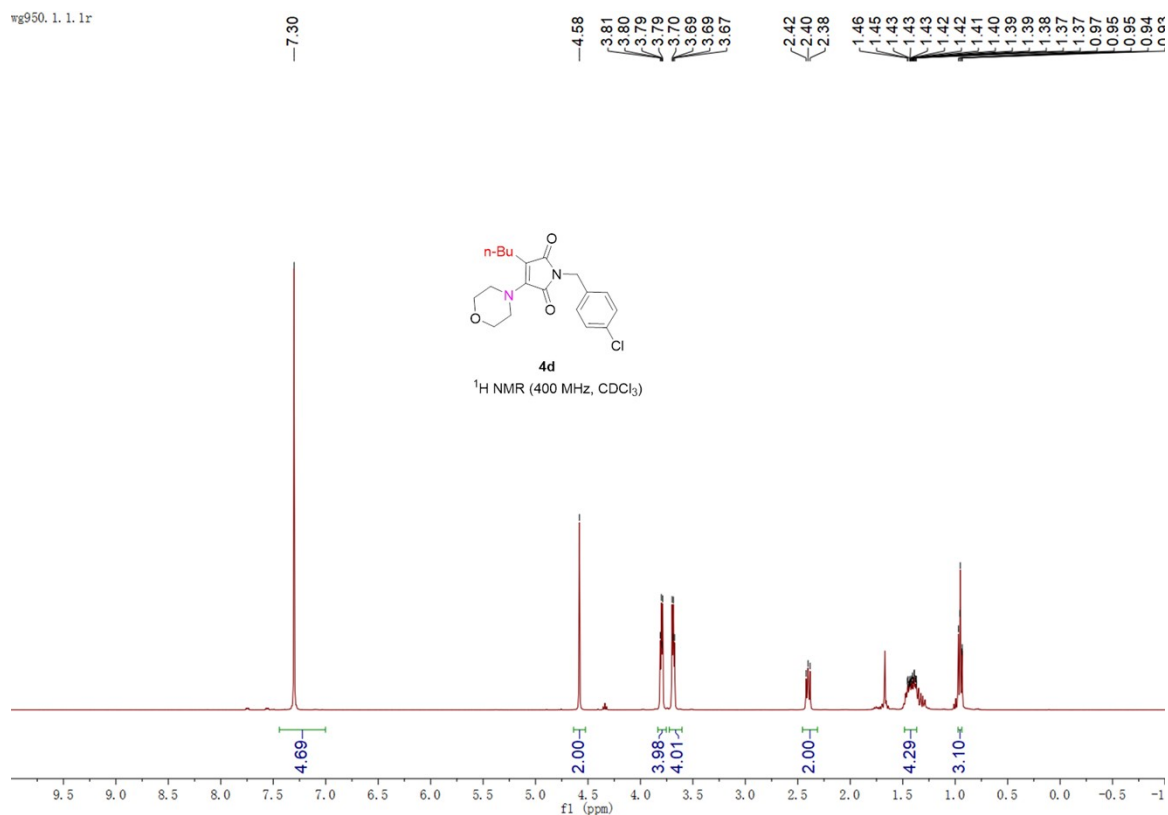

pdata/1

—172.05  
—168.21  
  
—143.69  
—135.43  
—133.53  
—129.98  
—128.79  
  
—108.42  
  
—66.94  
  
—48.70  
—40.67  
—32.87  
—23.17  
—22.74  
—13.91

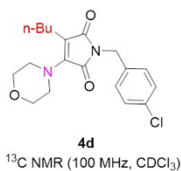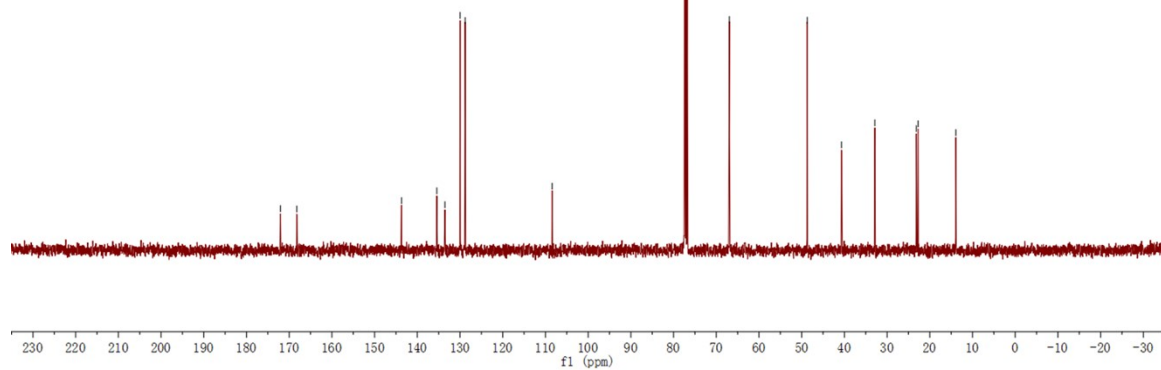

wg964.1.1.1r

7.46  
7.44  
7.26  
7.24

4.57  
3.81  
3.80  
3.79  
3.70  
3.69  
3.67

2.42  
2.40  
2.38

1.47  
1.46  
1.45  
1.44  
1.44  
1.43  
1.42  
1.42  
1.41  
1.39  
1.39  
1.37  
1.37  
1.37  
0.97  
0.95  
n.c.

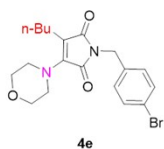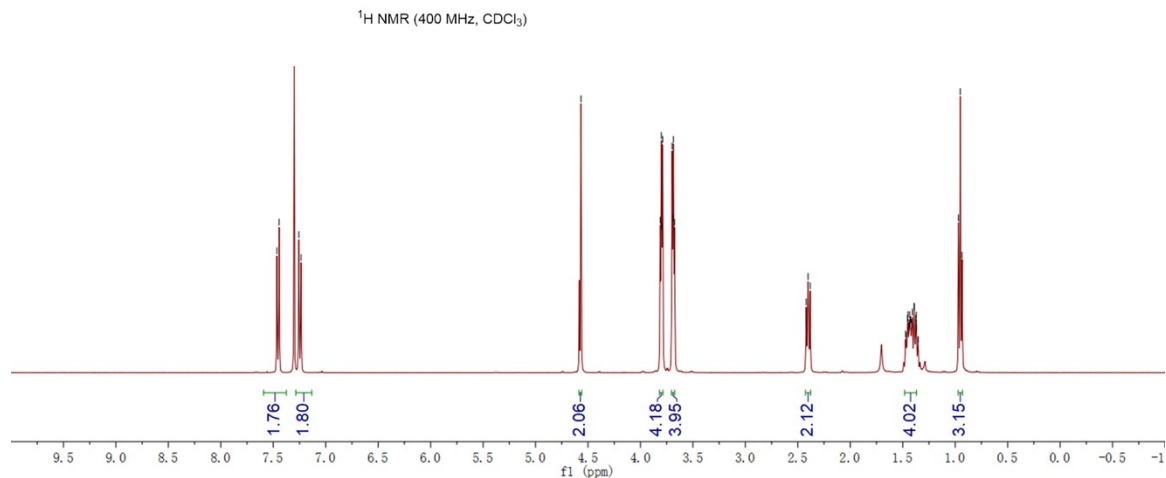





pdata/1

—171.98  
—168.18  
143.70  
140.81  
130.06  
129.74  
128.72  
125.69  
125.66  
125.62  
125.58  
122.99  
122.77  
—108.38  
—66.93  
—48.71  
—40.86  
—32.86  
23.18  
22.73  
—13.89

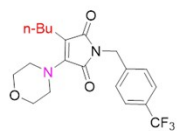

**4f**  
<sup>13</sup>C NMR (100 MHz, CDCl<sub>3</sub>)

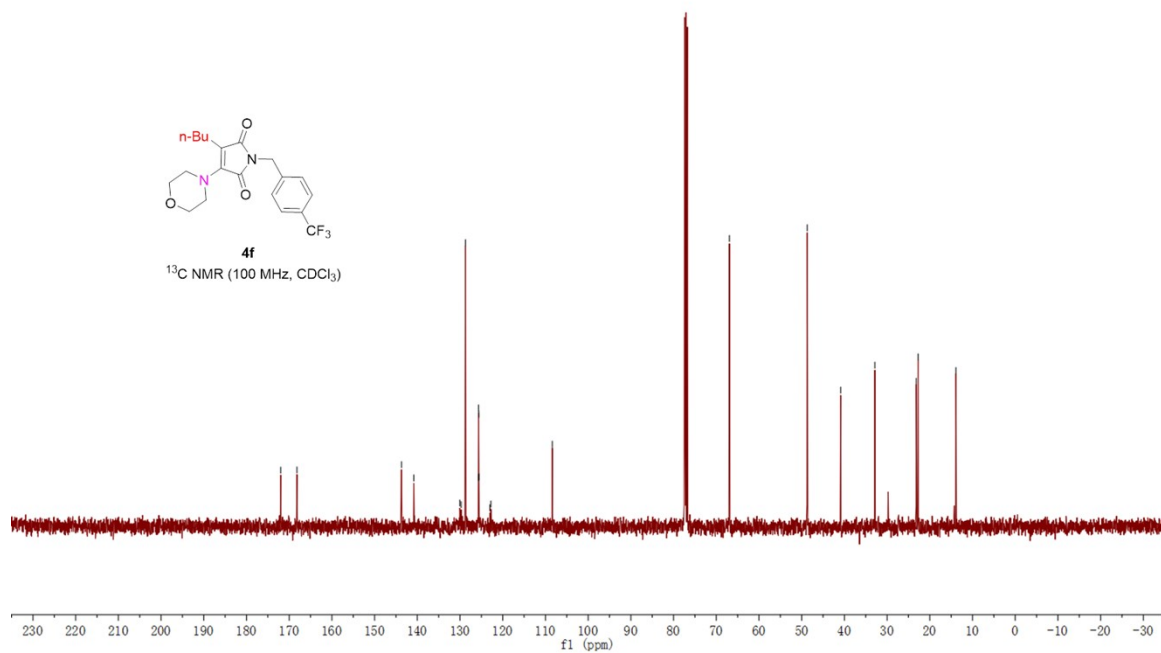

pdata/1

-62.56

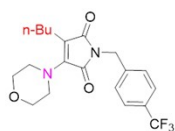

**4f**  
<sup>19</sup>F NMR (375 MHz, CDCl<sub>3</sub>)

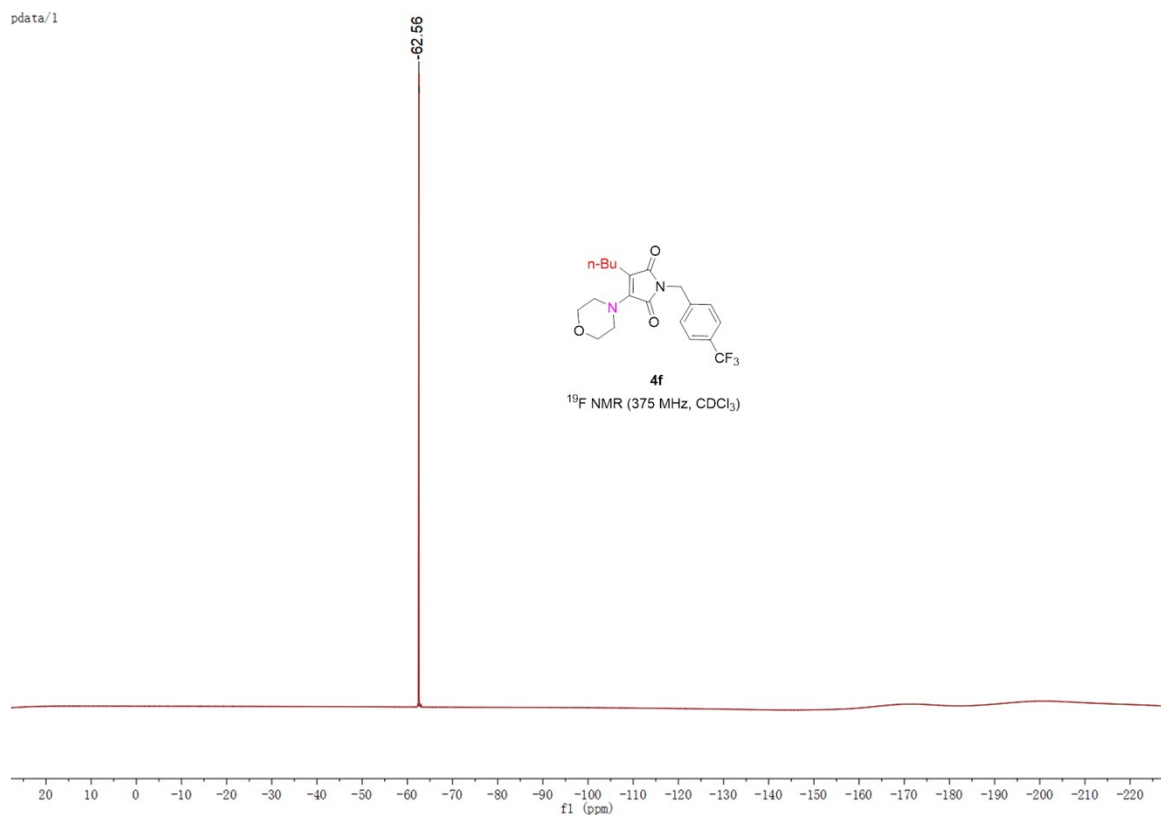

wg963.1.1.1r

8.33  
8.33  
7.91  
7.90  
7.88  
7.88  
7.84  
7.82  
7.82  
7.61  
7.58  
7.57  
7.55  
7.53  
7.51  
7.49  
7.47  
7.45  
-5.11  
3.81  
3.80  
3.79  
3.78  
3.69  
3.68  
3.66  
3.67  
2.45  
2.43  
2.41  
1.49  
1.48  
1.47  
1.46  
1.45  
1.44  
1.44  
1.43  
1.41  
1.41  
1.40  
1.39  
1.39  
1.37  
1.37  
0.96  
n of

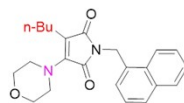

4g

<sup>1</sup>H NMR (400 MHz, CDCl<sub>3</sub>)

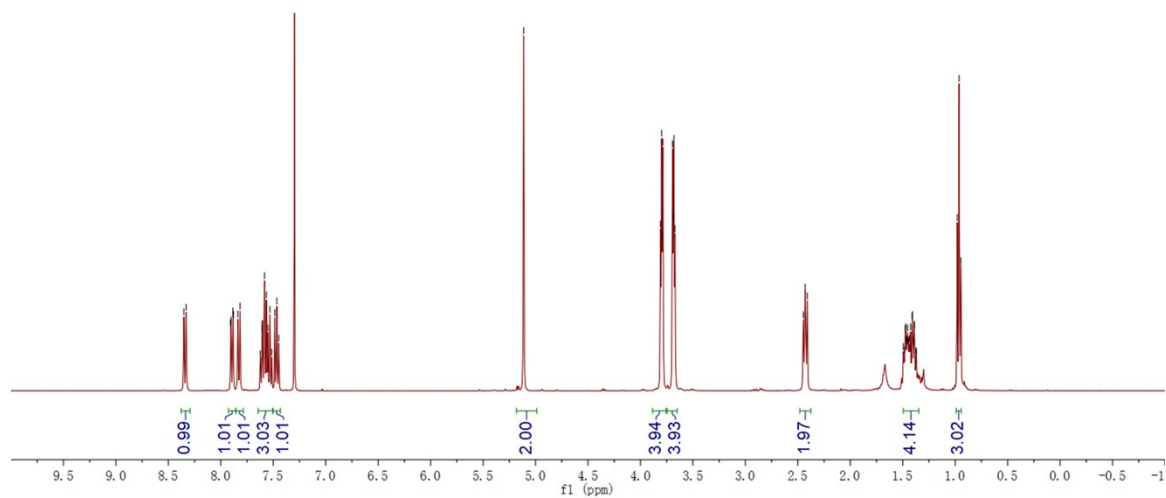

pdata/1

172.34  
168.54  
143.67  
133.81  
132.16  
131.34  
128.73  
128.49  
127.45  
126.45  
125.80  
125.39  
123.69  
108.56  
66.95  
48.71  
39.35  
32.90  
23.21  
22.75  
13.93

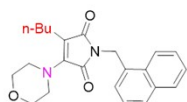

4g

<sup>13</sup>C NMR (100 MHz, CDCl<sub>3</sub>)

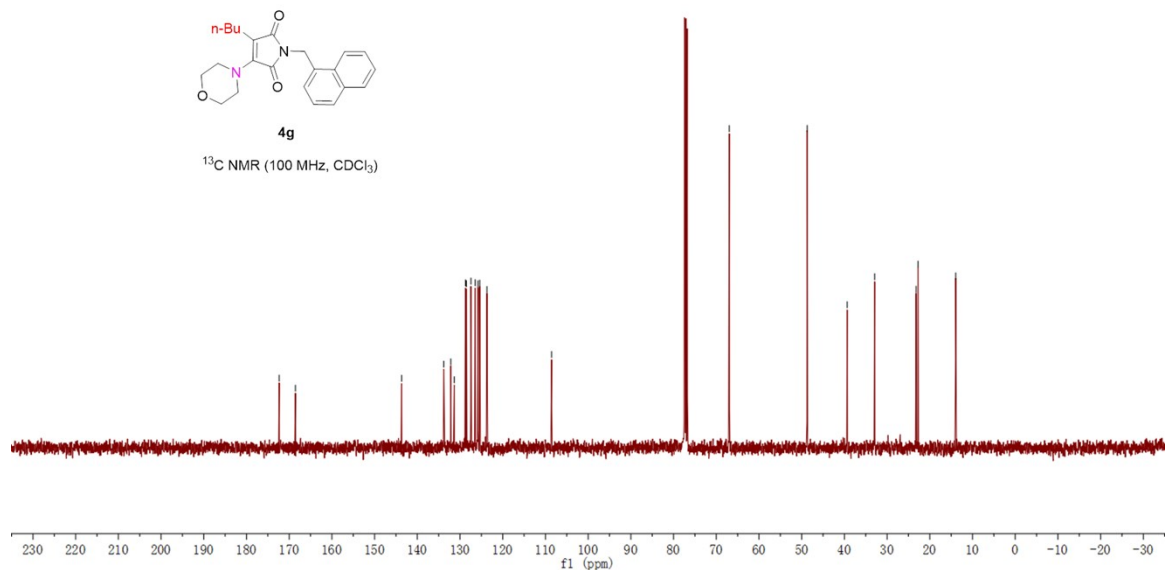

wg958.1.1.1r

7.24  
7.24  
7.23  
7.23  
7.08  
7.07  
6.97  
6.96  
6.95

4.80

3.82  
3.81  
3.80  
3.71  
3.68

2.43  
2.41  
2.39

1.46  
1.44  
1.43  
1.43  
1.42  
1.41  
1.41  
1.40  
1.39  
1.38  
1.38  
1.38  
0.97  
0.96  
0.95  
n.c.t

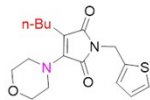

4h

<sup>1</sup>H NMR (400 MHz, CDCl<sub>3</sub>)

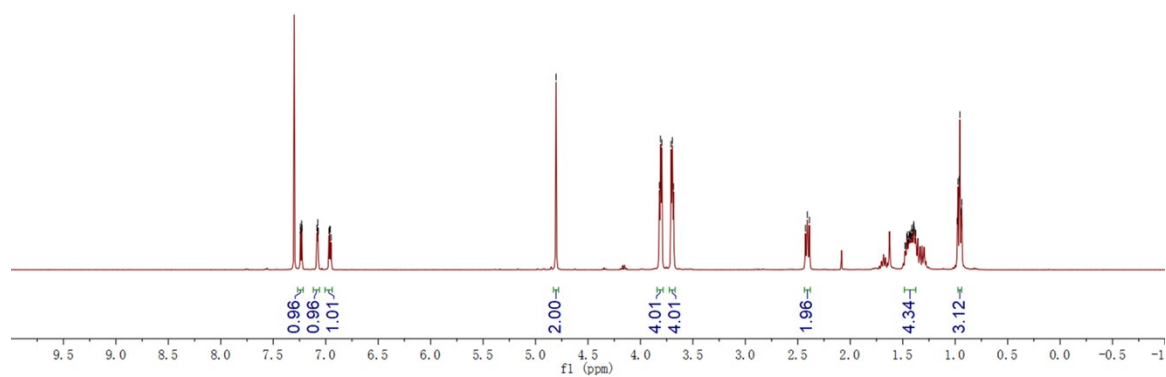

pdata/1

171.70  
167.90

143.72  
138.90

127.27  
126.86  
125.60

108.51

66.95

48.70

35.48  
32.84

23.14  
22.72

13.90

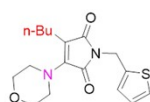

4h

<sup>13</sup>C NMR (100 MHz, CDCl<sub>3</sub>)

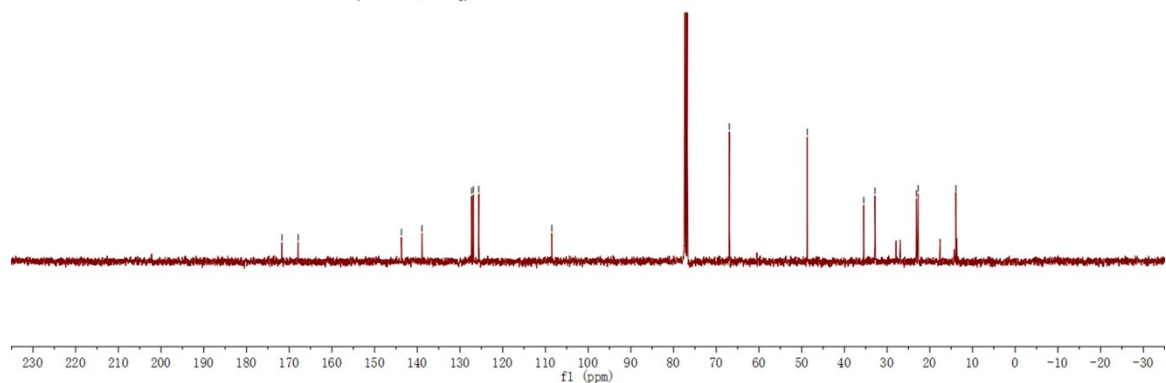

wg940.1.1.1r

7.45  
7.45  
7.41  
7.39  
7.22  
7.22  
7.20  
7.20

4.56  
3.82  
3.81  
3.80  
3.71  
3.70  
3.69

2.43  
2.41  
2.39  
1.48  
1.47  
1.46  
1.46  
1.45  
1.44  
1.43  
1.42  
1.41  
1.39  
1.38  
1.36  
0.97  
0.95  
0.94

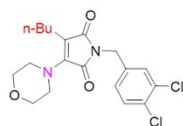

4i

<sup>1</sup>H NMR (400 MHz, CDCl<sub>3</sub>)

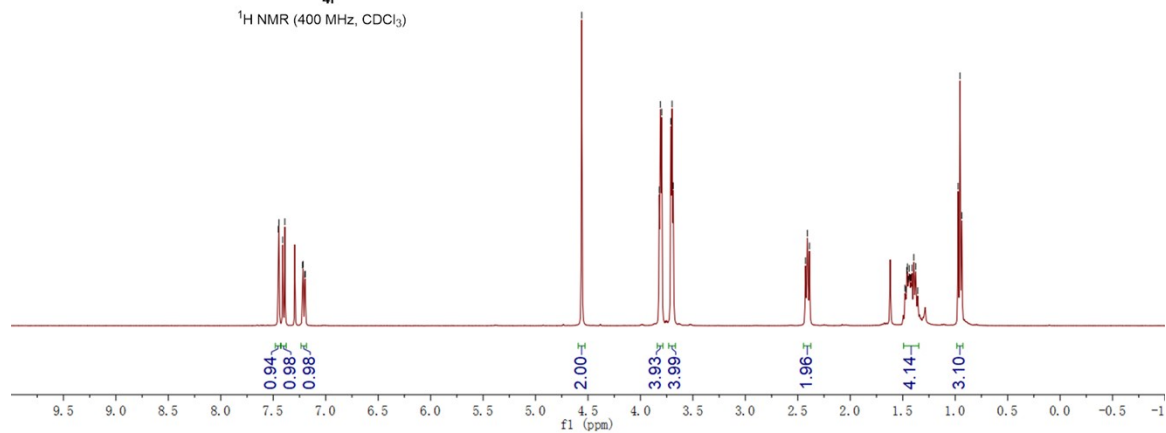

pdata/1

171.87  
168.10

143.71  
137.06  
132.83  
131.84  
130.61  
130.48  
127.97

108.35

66.93

48.71

40.25

32.84

23.18  
22.73

13.90

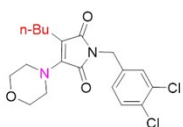

4i

<sup>13</sup>C NMR (100 MHz, CDCl<sub>3</sub>)

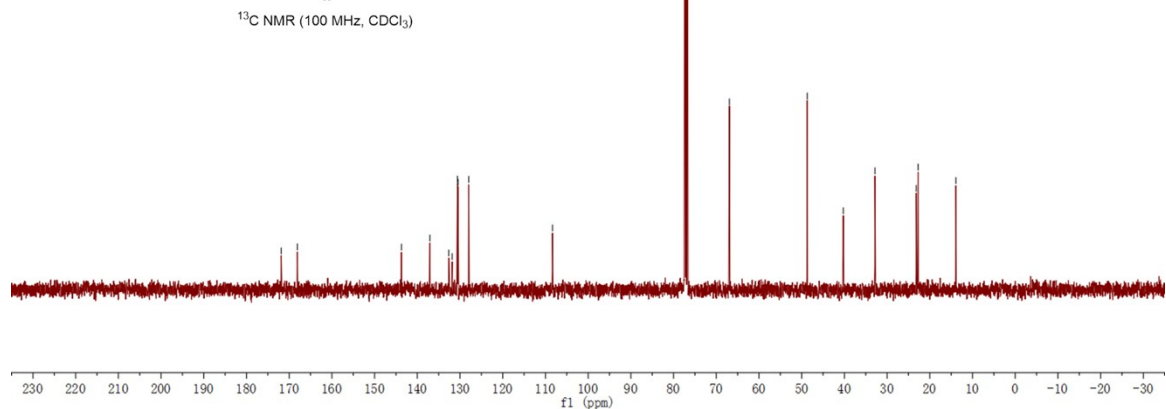

wg962.1.1.1r

7.43  
7.41  
7.34  
7.32

3.86  
3.84  
3.83  
3.77  
3.76  
3.75  
3.74

2.50  
2.49  
2.48  
2.48  
2.46

1.54  
1.53  
1.52  
1.51  
1.51  
1.50  
1.49  
1.45  
1.44  
1.43  
1.42  
1.41  
1.41  
1.40  
1.39  
1.39  
0.98  
0.98

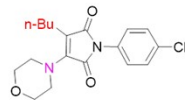

4j

<sup>1</sup>H NMR (400 MHz, CDCl<sub>3</sub>)

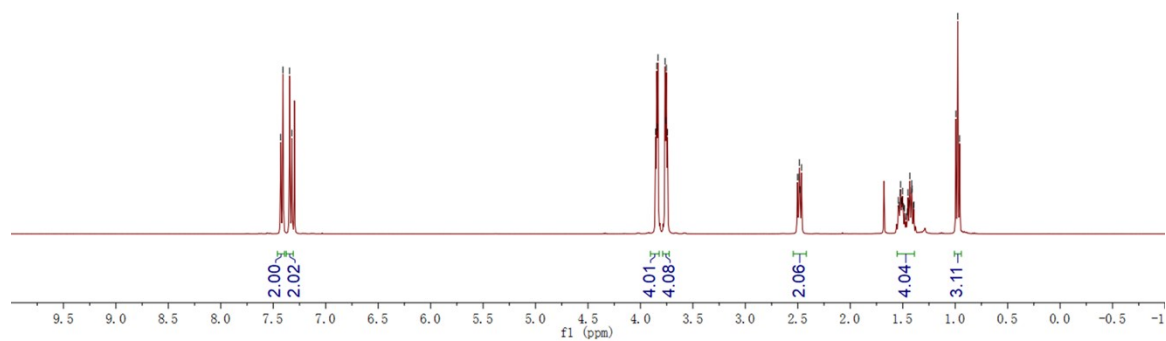

pdata/1

170.85  
167.04

143.59  
132.77  
130.57  
129.04  
127.09

108.88

66.99

48.92

32.71  
23.26  
22.76

13.92

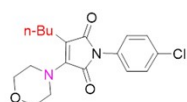

4j

<sup>13</sup>C NMR (100 MHz, CDCl<sub>3</sub>)

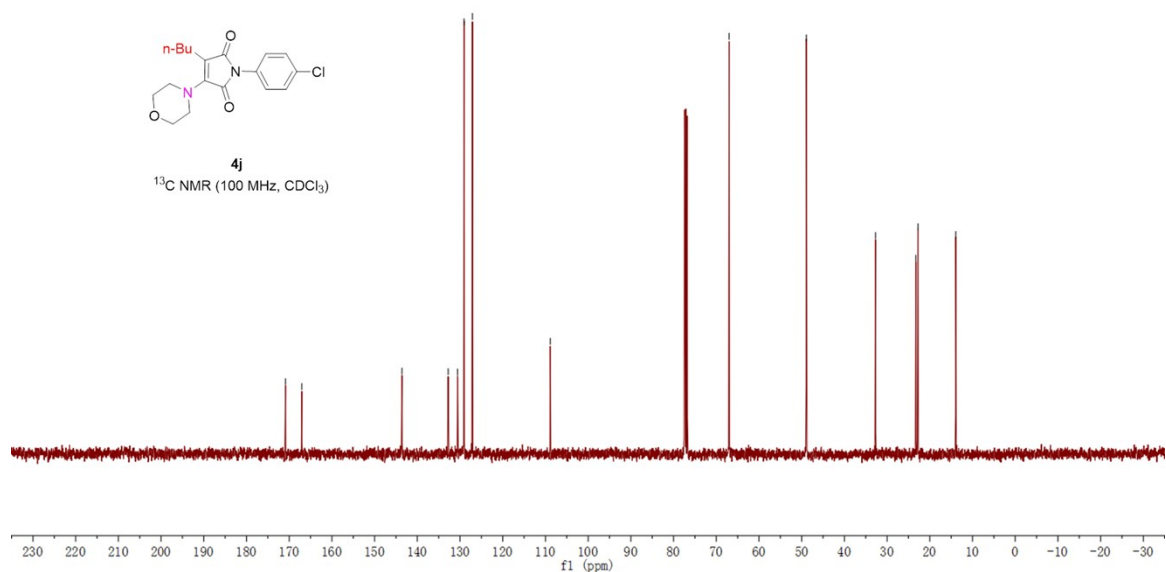

wg1121.1.1.1r

7.33  
7.32  
6.88  
6.86

4.57  
3.82  
3.81  
3.80  
3.79  
3.79  
3.70  
3.69  
3.68  
3.68  
2.42  
2.40  
2.38  
2.38  
1.46  
1.44  
1.44  
1.43  
1.42  
1.41  
1.39  
1.38  
0.98  
0.97  
0.96  
0.95  
0.94

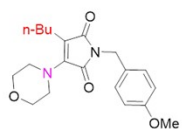

<sup>1</sup>H NMR (400 MHz, CDCl<sub>3</sub>)

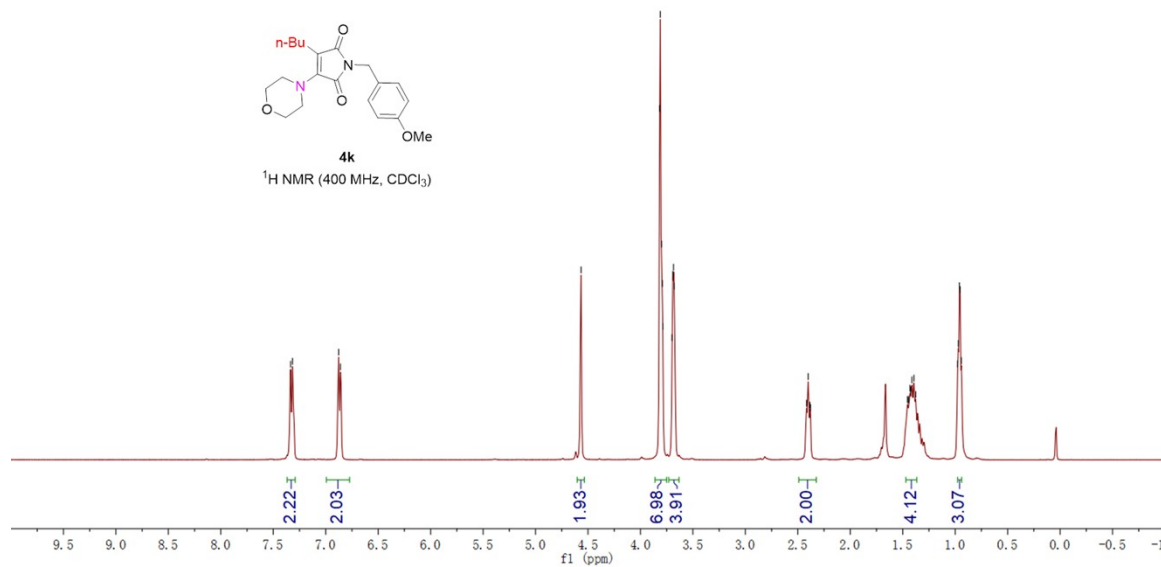

pdata/1

172.26  
168.33  
159.08  
143.68  
130.00  
129.28  
113.95  
108.50  
66.96  
55.30  
48.70  
40.77  
32.89  
23.15  
22.75  
13.91

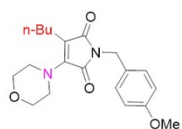

<sup>13</sup>C NMR (100 MHz, CDCl<sub>3</sub>)

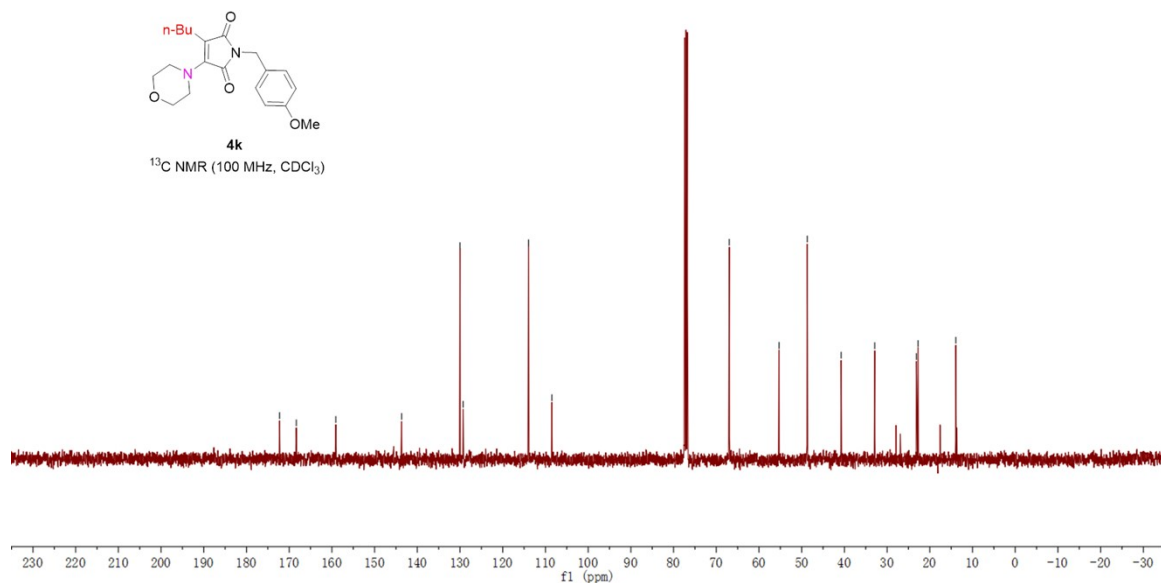

wg1125.1.1.1r

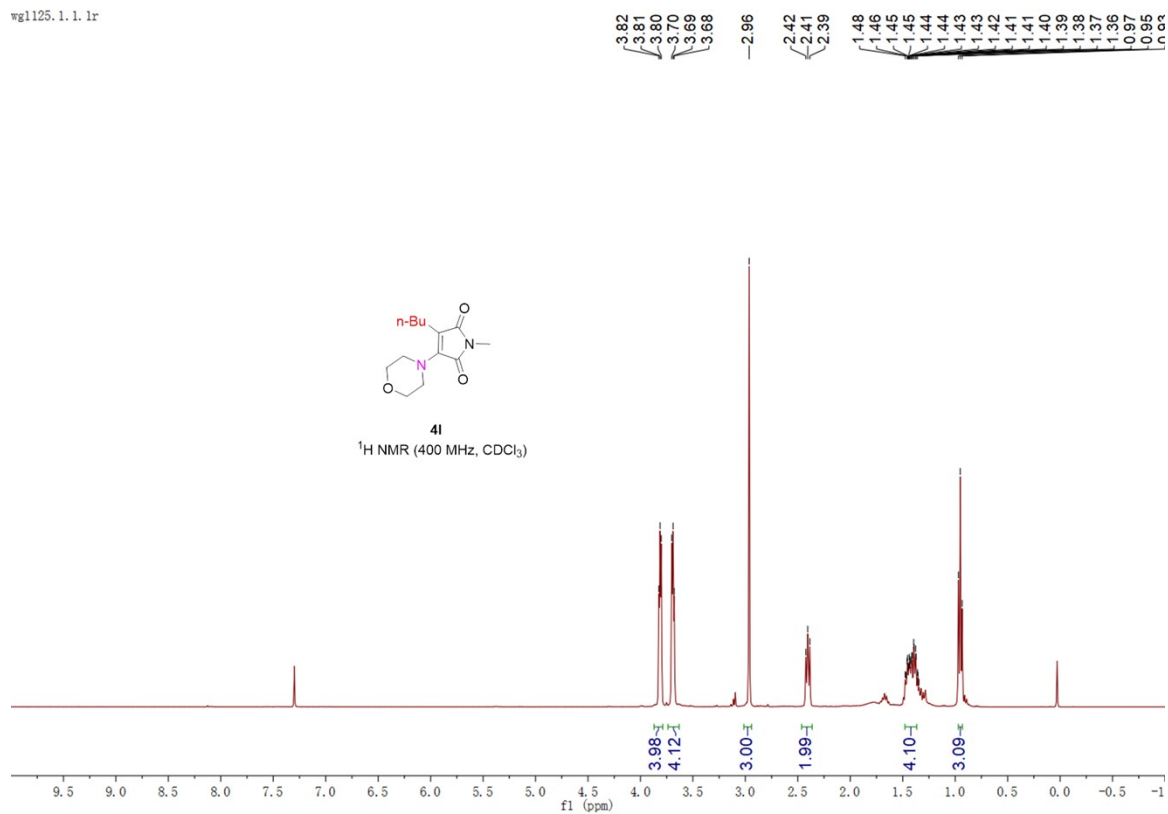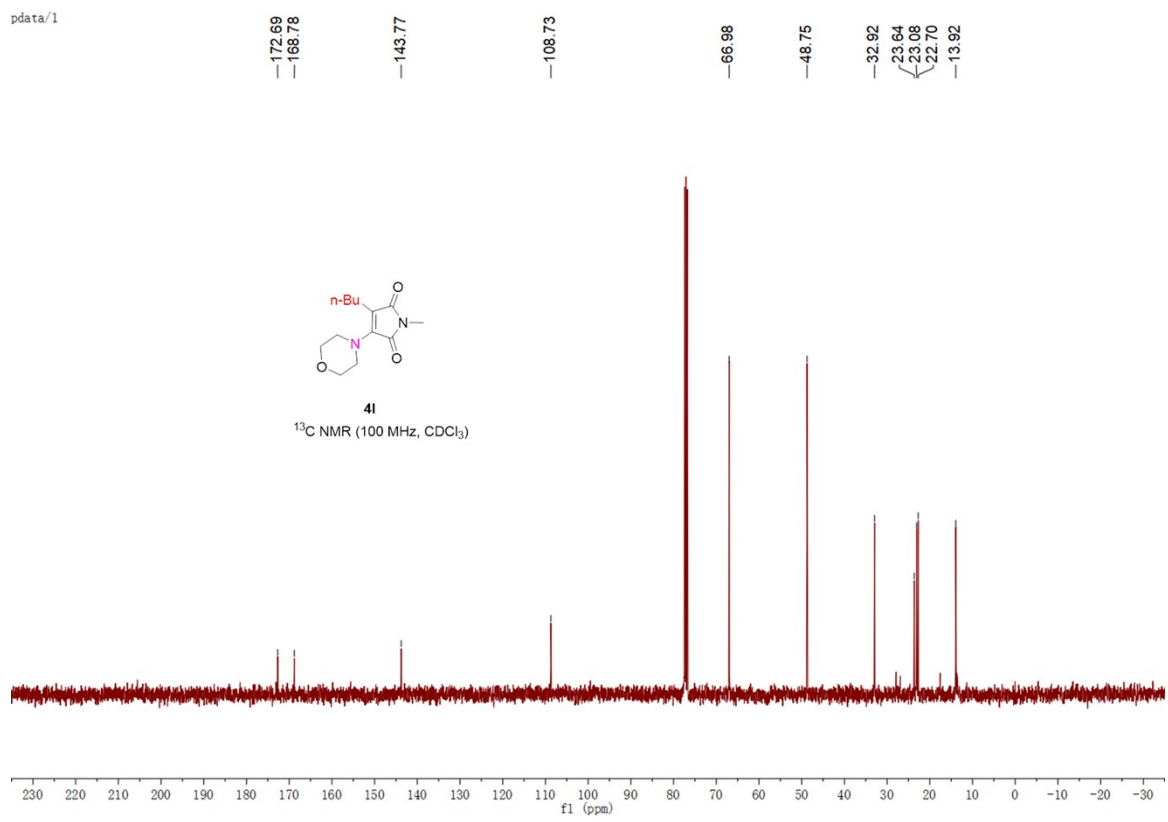

wg1029.1.1.1r

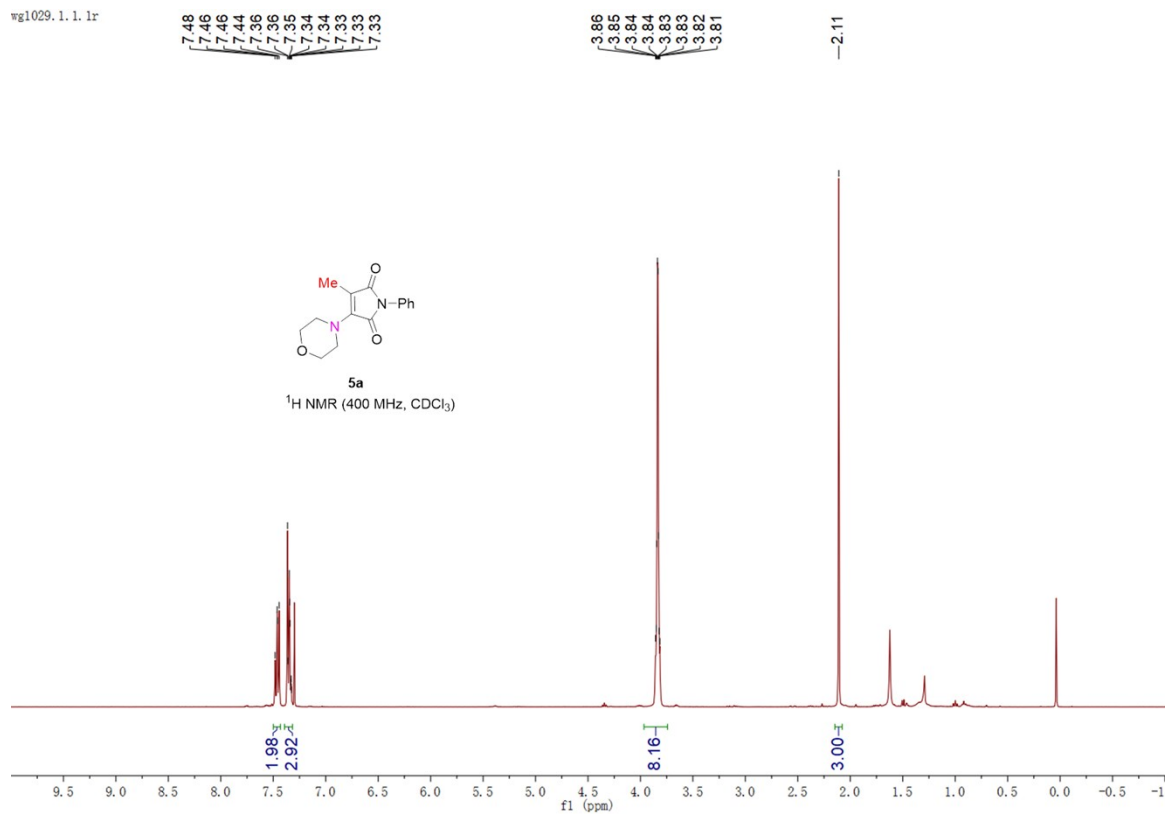

pdata/1

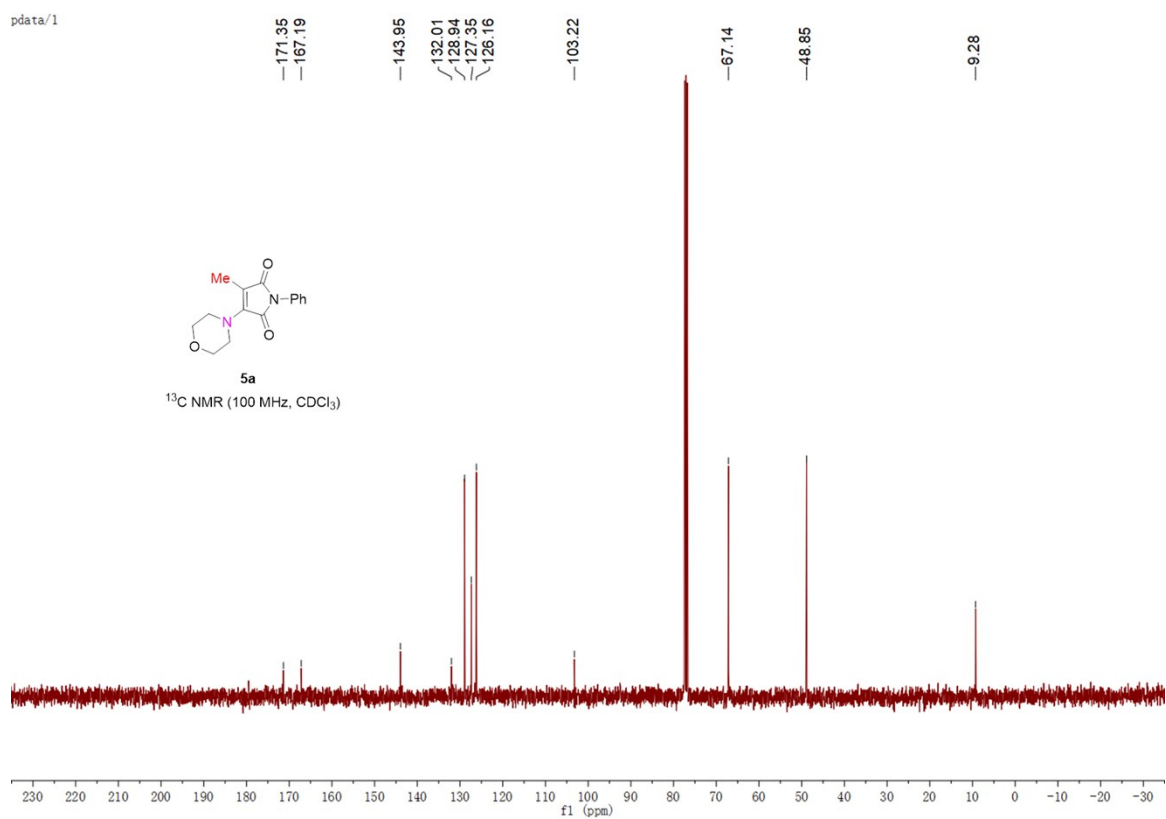



wg1068.1.1.1r

7.47  
7.45  
7.44  
7.43  
7.38  
7.38  
7.37  
7.36  
7.35  
7.35  
7.34  
7.34  
7.33  
7.33  
7.32  
7.31  
7.31

3.77  
3.75  
3.74

2.10  
1.74  
1.73  
1.72

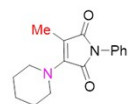

**5b**  
<sup>1</sup>H NMR (400 MHz, CDCl<sub>3</sub>)

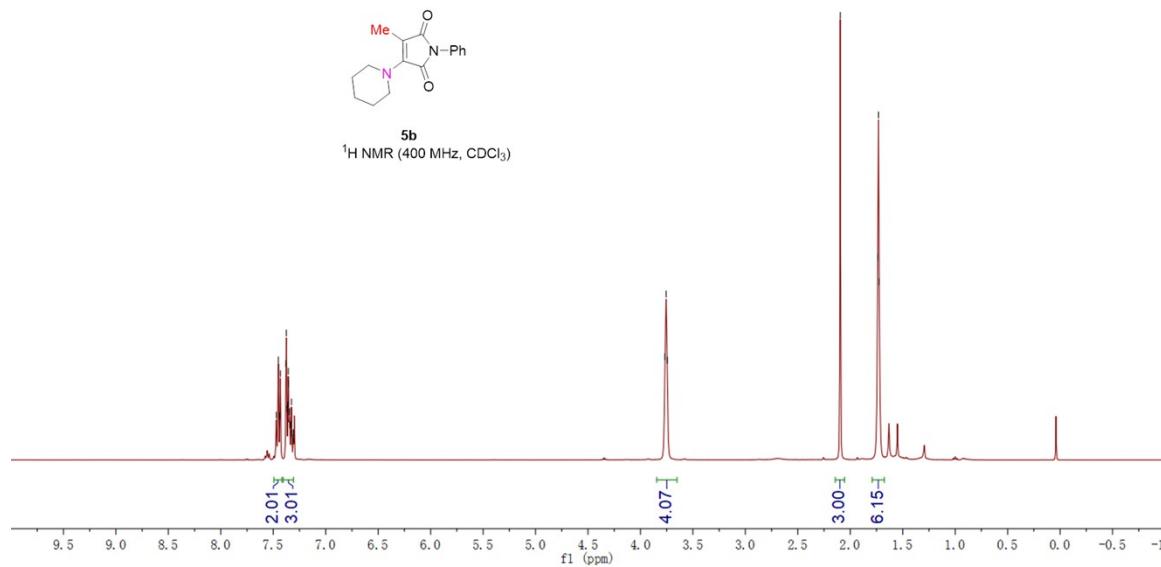

pdata/1

171.67  
167.30

144.86

132.32  
128.84  
127.07  
126.16

100.92

49.98

26.72  
24.25

9.37

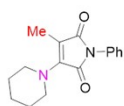

**5b**  
<sup>13</sup>C NMR (100 MHz, CDCl<sub>3</sub>)

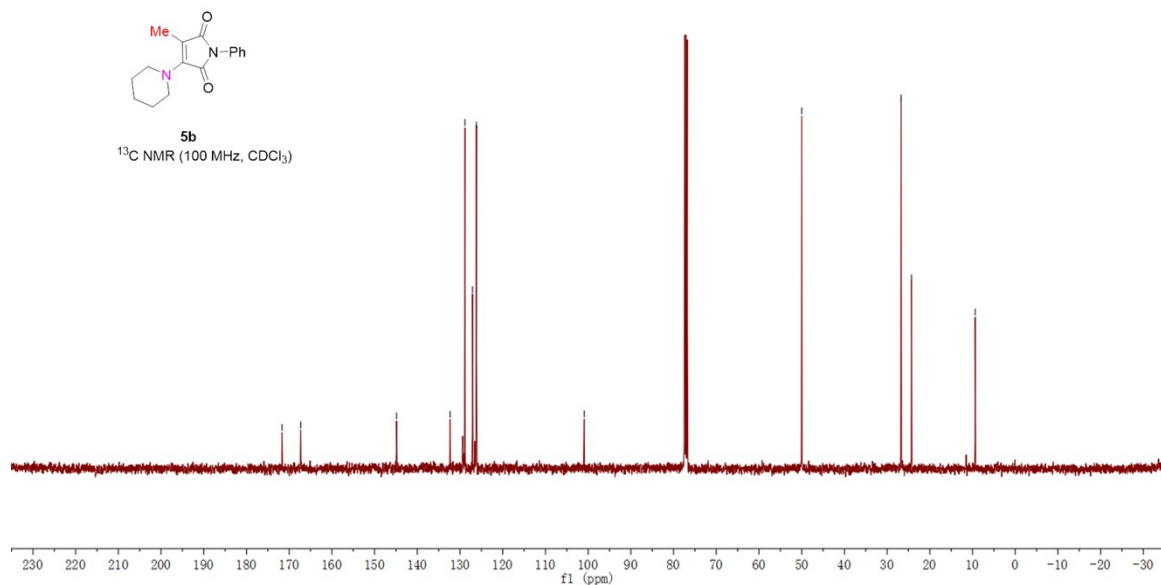

wg1070.1.1.1r

7.47  
7.47  
7.45  
7.44  
7.43  
7.43  
7.38  
7.37  
7.37  
7.36  
7.35  
7.35  
7.34  
7.33  
7.33  
7.32  
7.31  
7.31

4.43  
4.43  
4.42  
4.40  
4.39  
4.39

3.15  
3.15  
3.12  
3.11  
3.09  
3.08

2.10  
1.80  
1.80  
1.77  
1.76  
1.72  
1.71  
1.70  
1.68  
1.68  
1.67  
1.66  
1.65  
1.40  
1.39  
1.36  
1.35  
1.33  
1.32  
1.32  
1.03  
1.01

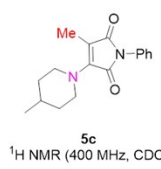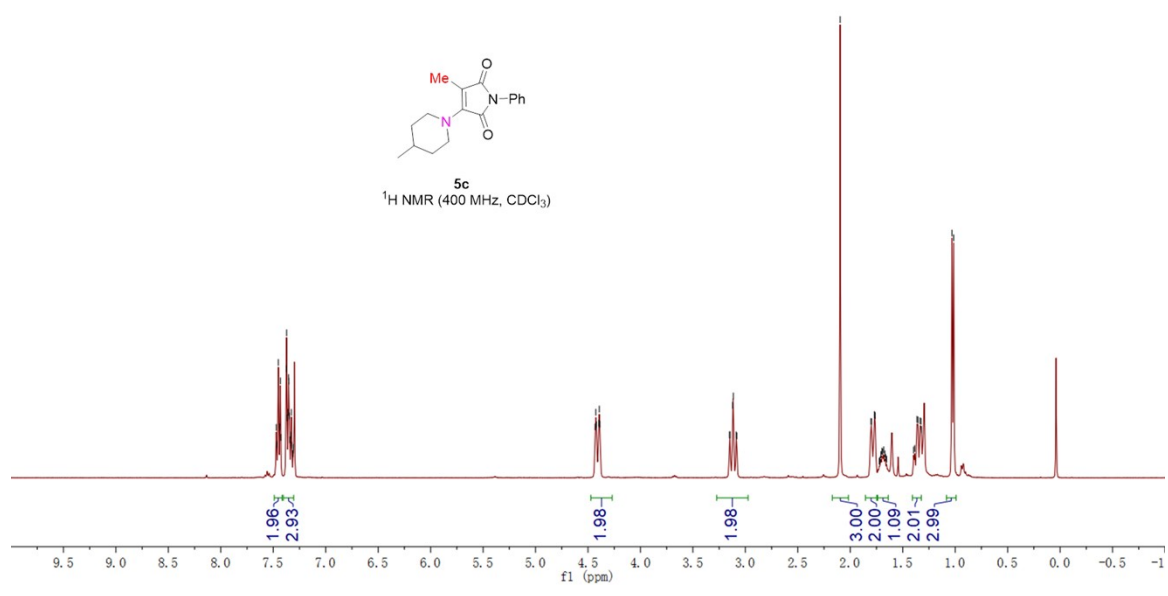

pdata/1

171.68  
167.31  
144.79  
132.31  
128.85  
127.09  
126.17  
101.04  
49.28  
34.90  
30.83  
21.89  
9.37

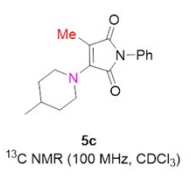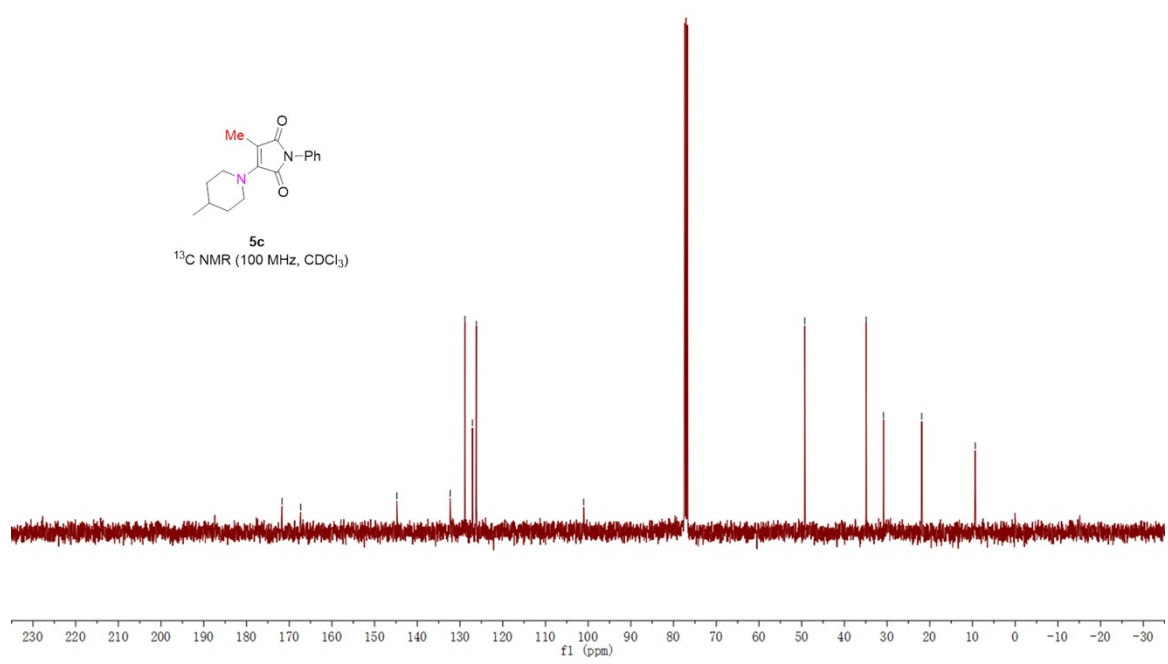

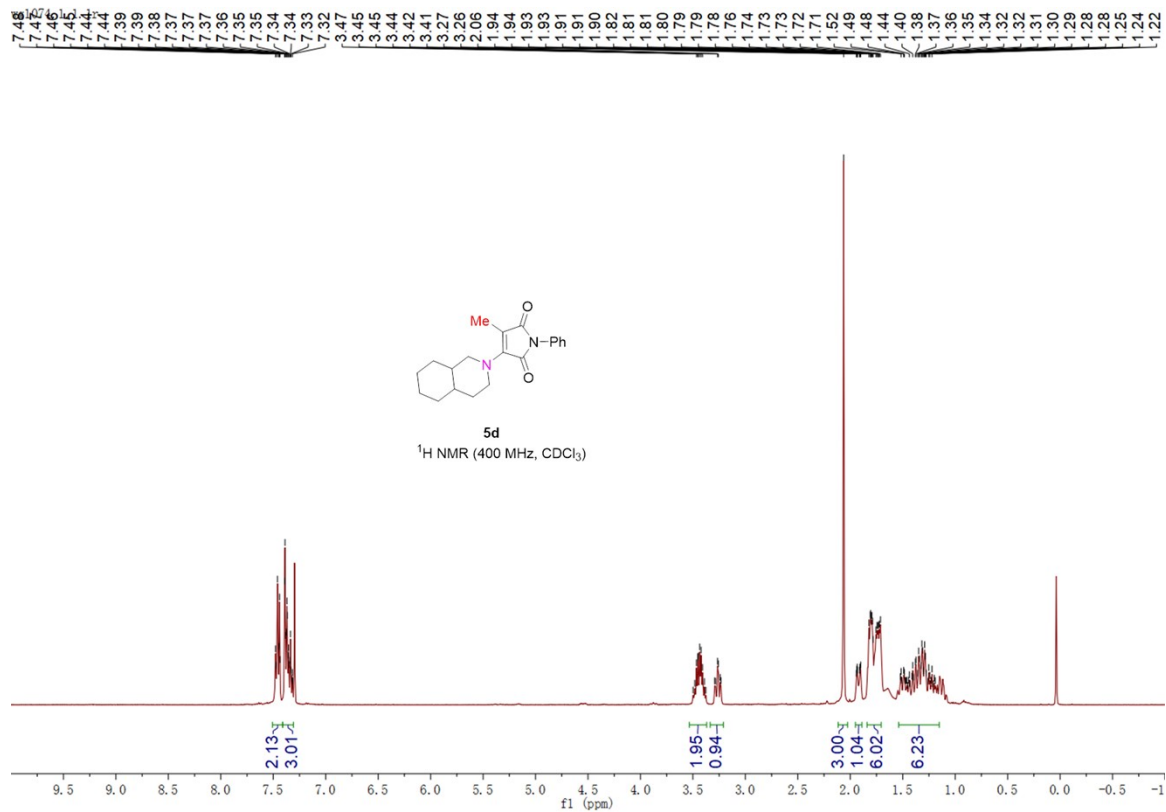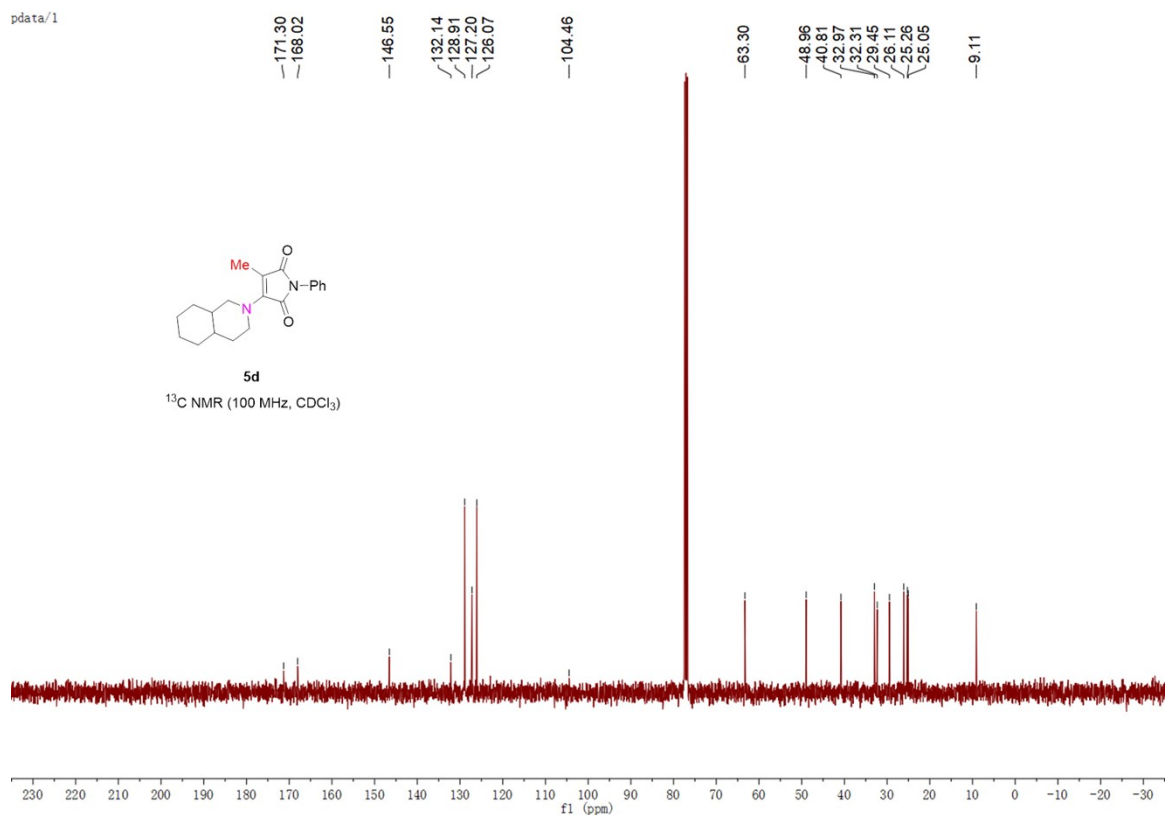

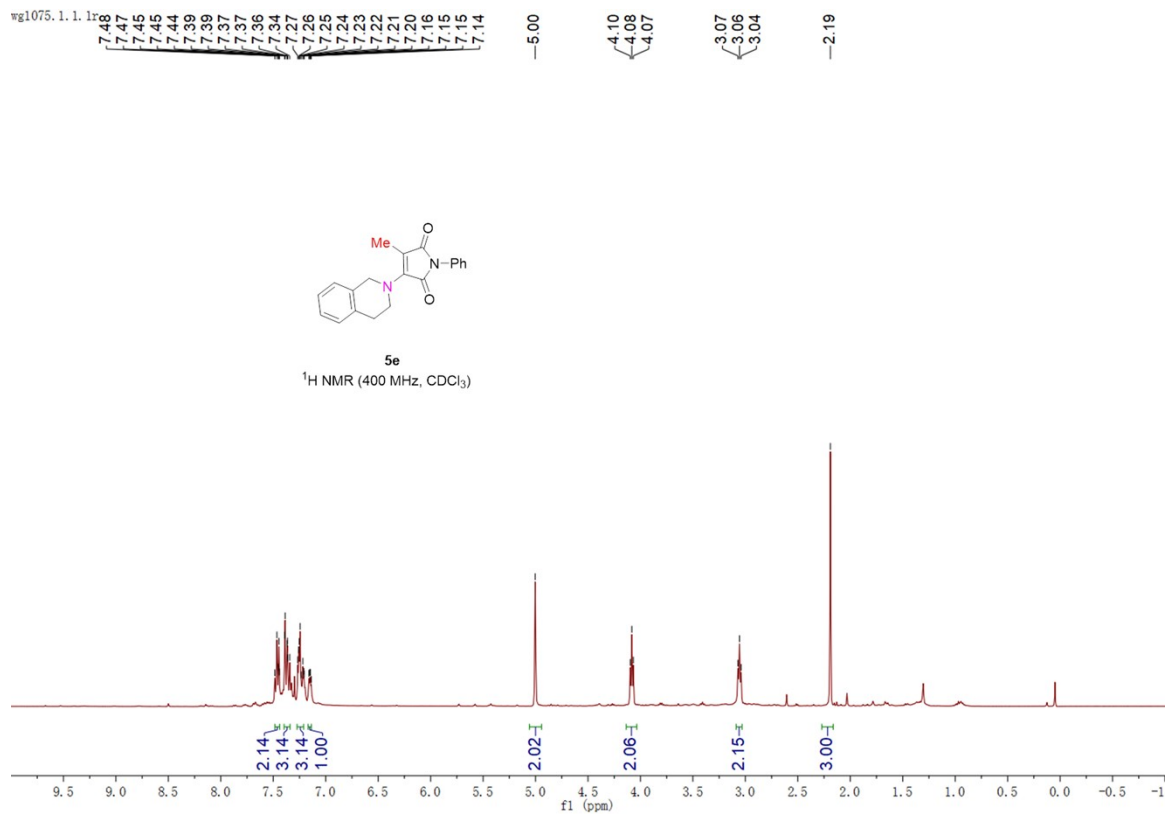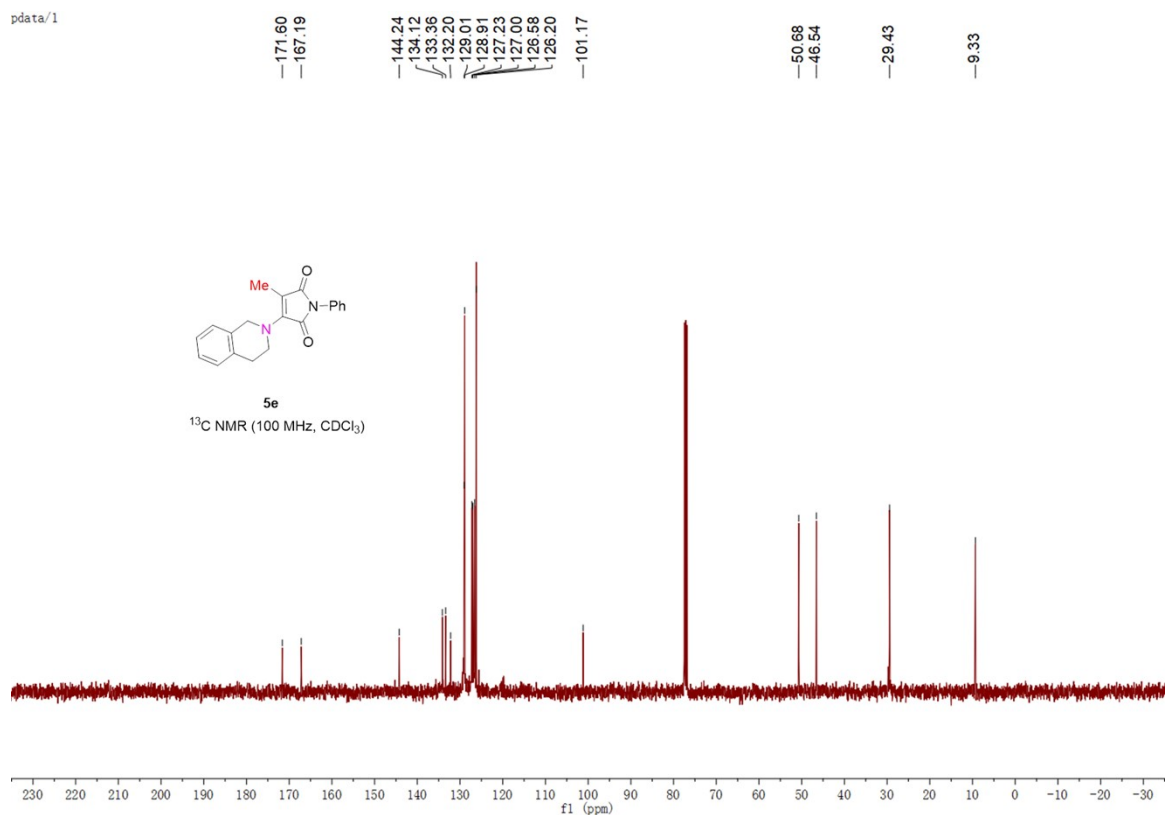

wg1076.1.1.1r

7.47  
7.47  
7.45  
7.44  
7.43  
7.43  
7.39  
7.38  
7.37  
7.37  
7.36  
7.34  
7.34  
7.33  
7.32  
7.32

3.93  
3.91  
3.90

2.17  
1.99  
1.98  
1.98  
1.97  
1.96

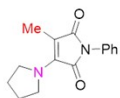

**5f**  
<sup>1</sup>H NMR (400 MHz, CDCl<sub>3</sub>)

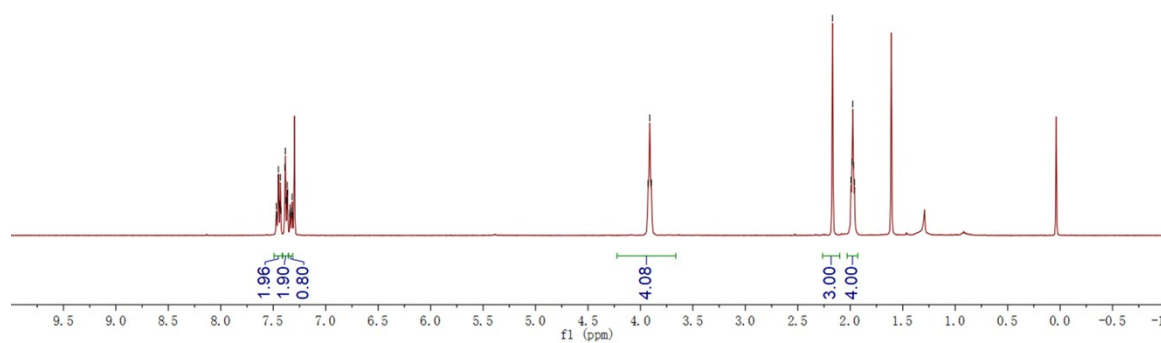

pdata/1

172.23  
166.78

149.03

132.48  
128.82  
126.96  
126.13

85.79

50.42

25.38

8.39

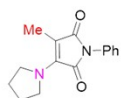

**5f**  
<sup>13</sup>C NMR (100 MHz, CDCl<sub>3</sub>)

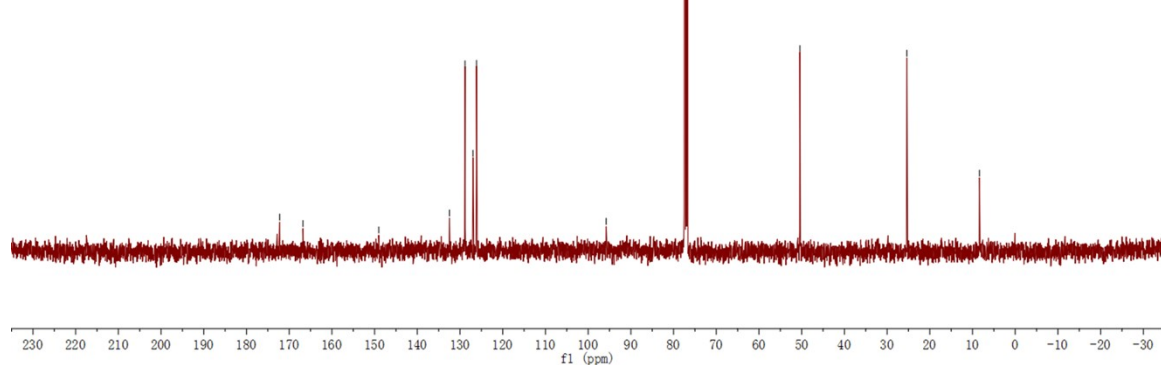

wg1072.1.1.1r

7.49  
7.47  
7.47  
7.45  
7.36  
7.36  
7.34  
7.34  
7.33  
7.32  
7.30  
7.30  
7.28  
7.28  
7.27

3.97  
3.95  
3.93  
3.31  
3.01  
3.00  
2.98

2.12

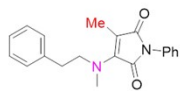

5g

<sup>1</sup>H NMR (400 MHz, CDCl<sub>3</sub>)

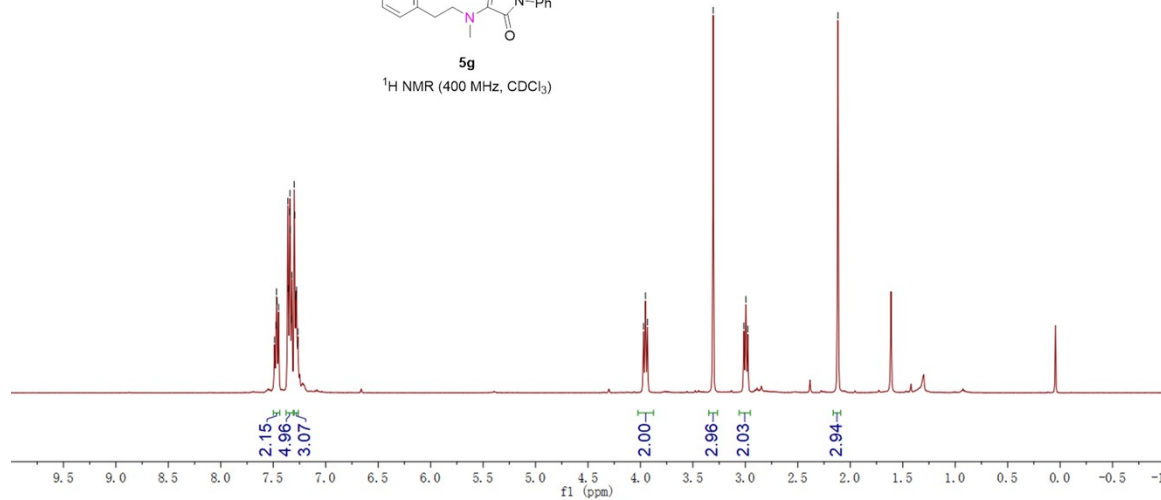

pdata/1

171.64  
167.01

144.46  
138.41  
132.26  
129.01  
128.90  
128.89  
127.18  
126.75  
126.27

89.33

55.19

40.40  
35.21

9.17

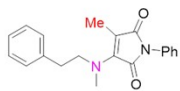

5g

<sup>13</sup>C NMR (100 MHz, CDCl<sub>3</sub>)

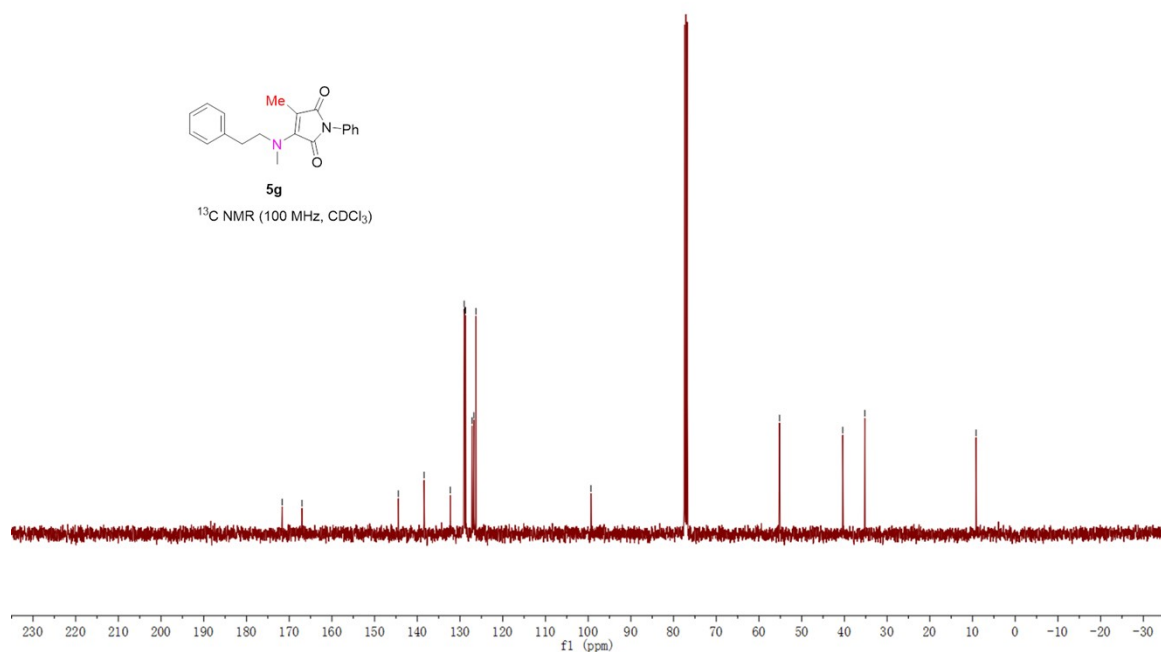

wg1071.1.1.1r

7.48  
7.46  
7.46  
7.44  
7.36  
7.34  
7.34  
7.33  
7.33  
7.32

3.91  
3.90  
3.88  
3.87  
— 3.36

— 2.26  
— 2.17

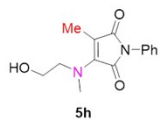

<sup>1</sup>H NMR (400 MHz, CDCl<sub>3</sub>)

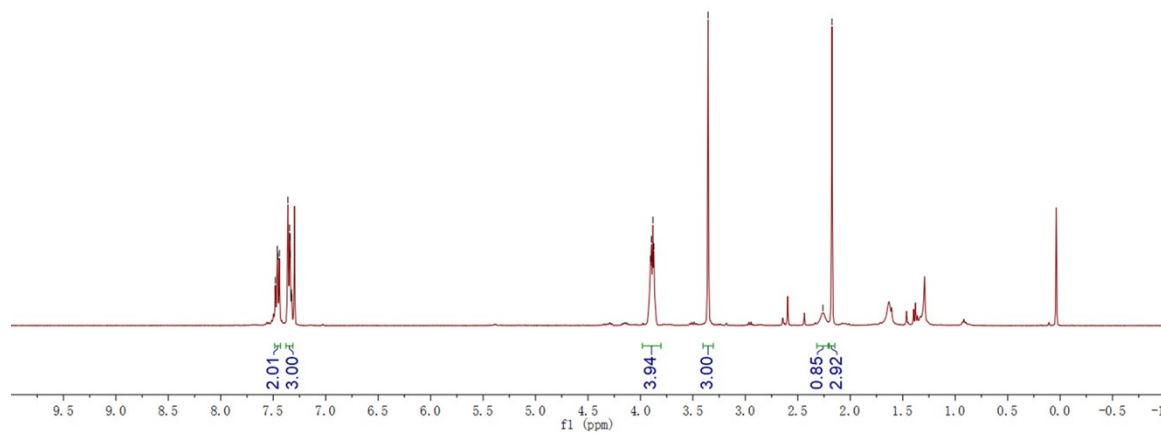

pdata/1

— 171.50  
— 167.90

— 145.08

132.05  
128.92  
127.94  
126.22

— 100.38

— 60.84  
— 54.98

— 40.19

— 9.19

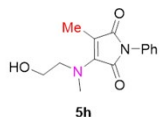

<sup>13</sup>C NMR (100 MHz, CDCl<sub>3</sub>)

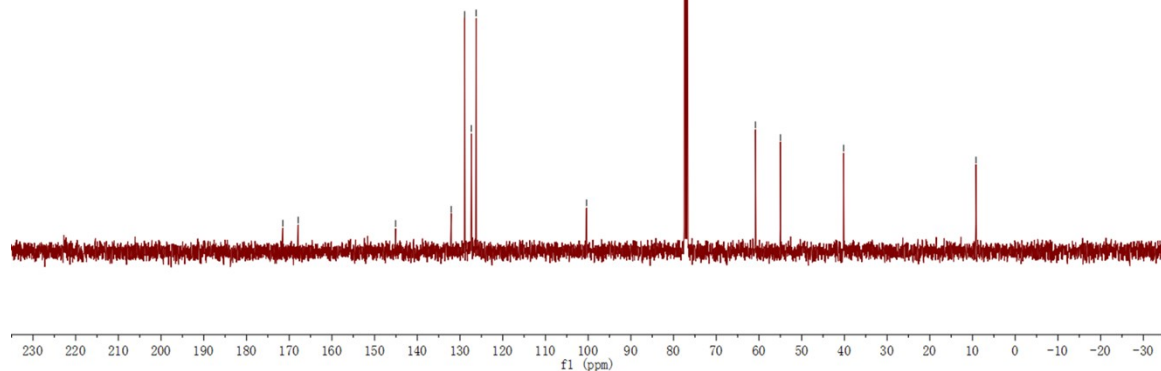

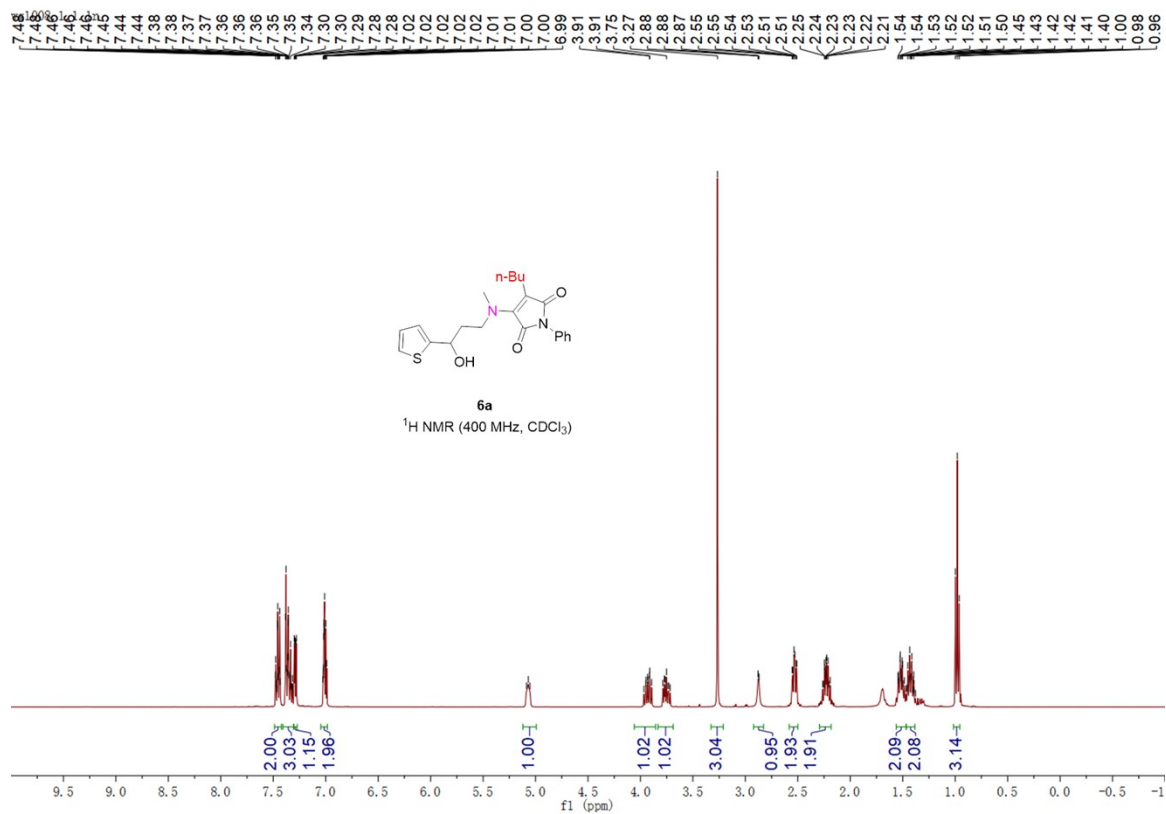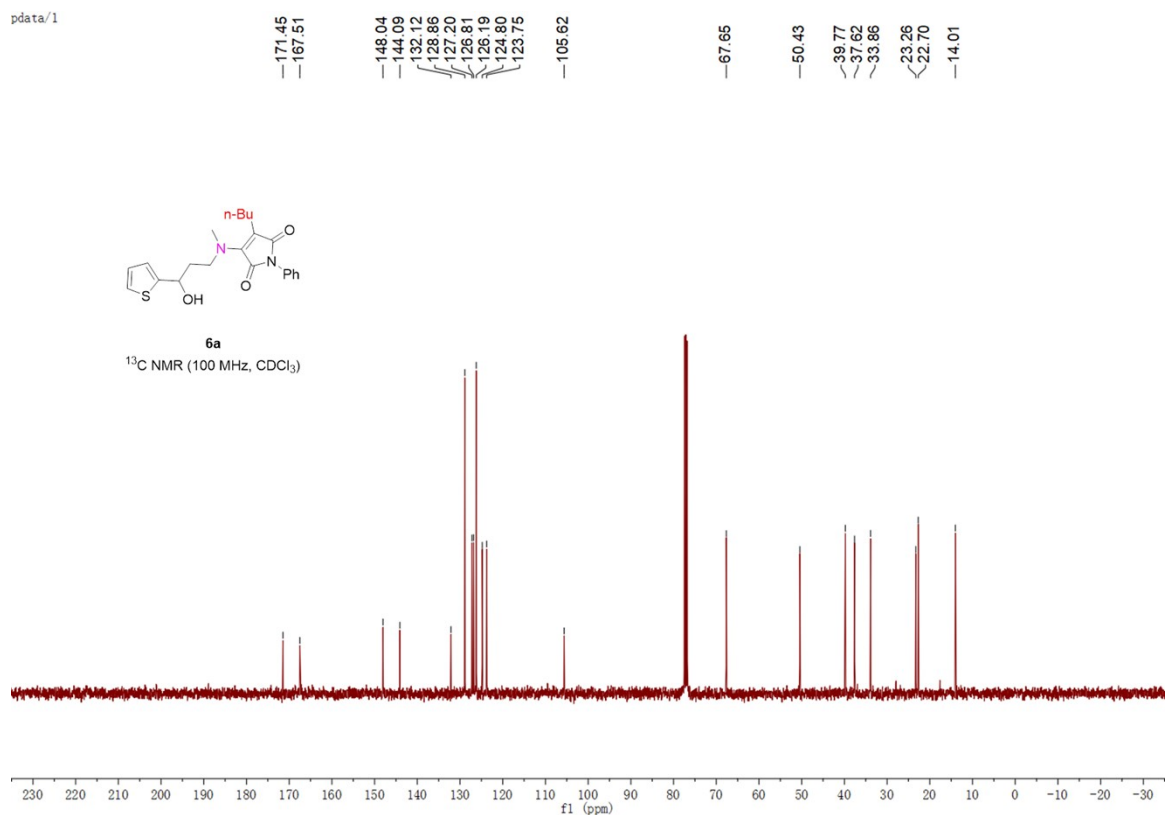



7.47  
7.45  
7.43  
7.38  
7.36  
7.37  
7.36  
7.36  
7.35  
7.35  
7.33  
7.31  
4.86  
4.85  
4.84  
4.83  
3.94  
3.93  
3.91  
3.90  
3.71  
3.70  
3.69  
3.68  
3.66  
3.64  
3.63  
3.60  
3.58  
3.57  
2.59  
2.58  
2.57  
2.56  
2.51  
2.50  
2.48  
2.48  
2.07  
2.06  
2.05  
2.04  
2.04  
2.03  
2.02  
2.01  
2.00  
1.98  
1.55  
1.54  
1.53  
1.52  
1.51  
1.50  
1.50  
1.49  
1.47  
1.46  
1.46  
1.45  
1.43  
1.41  
1.39  
0.99  
0.97  
0.95

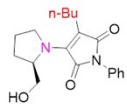

**6b**  
<sup>1</sup>H NMR (400 MHz, CDCl<sub>3</sub>)

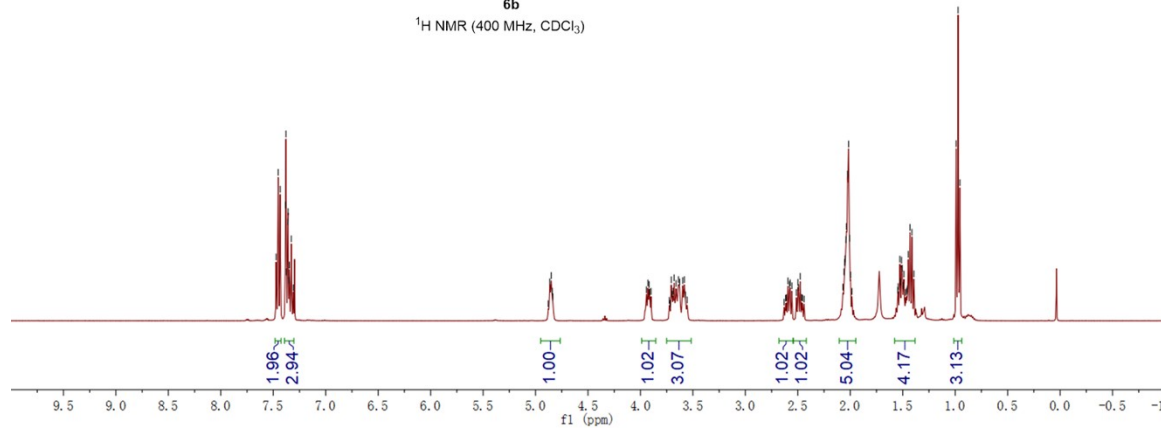

pdata/1

171.67  
167.59  
142.15  
132.23  
128.84  
127.14  
126.18  
103.26  
65.25  
61.11  
60.62  
34.51  
27.77  
23.18  
23.05  
22.69  
14.02

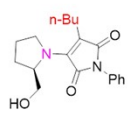

**6b**  
<sup>13</sup>C NMR (100 MHz, CDCl<sub>3</sub>)

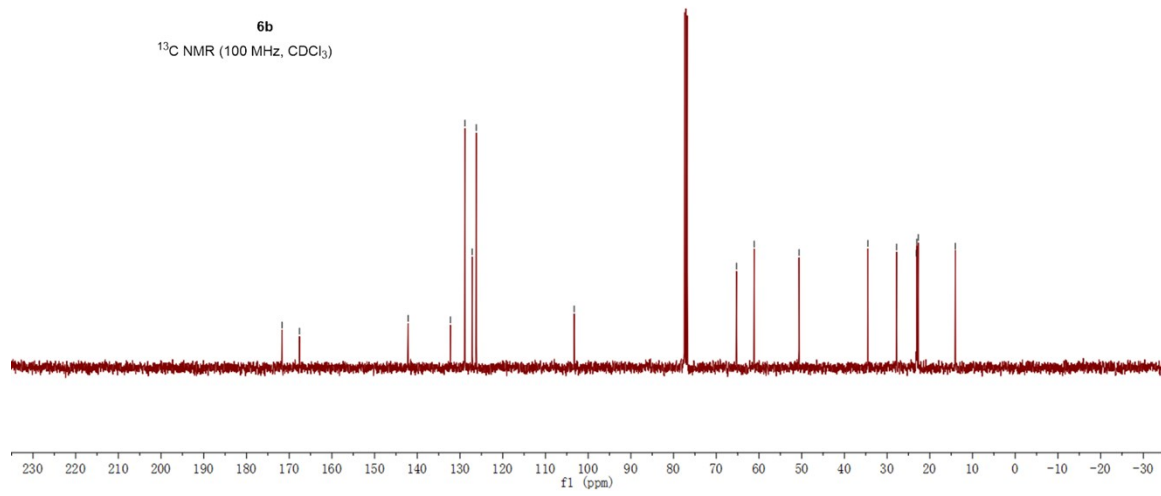

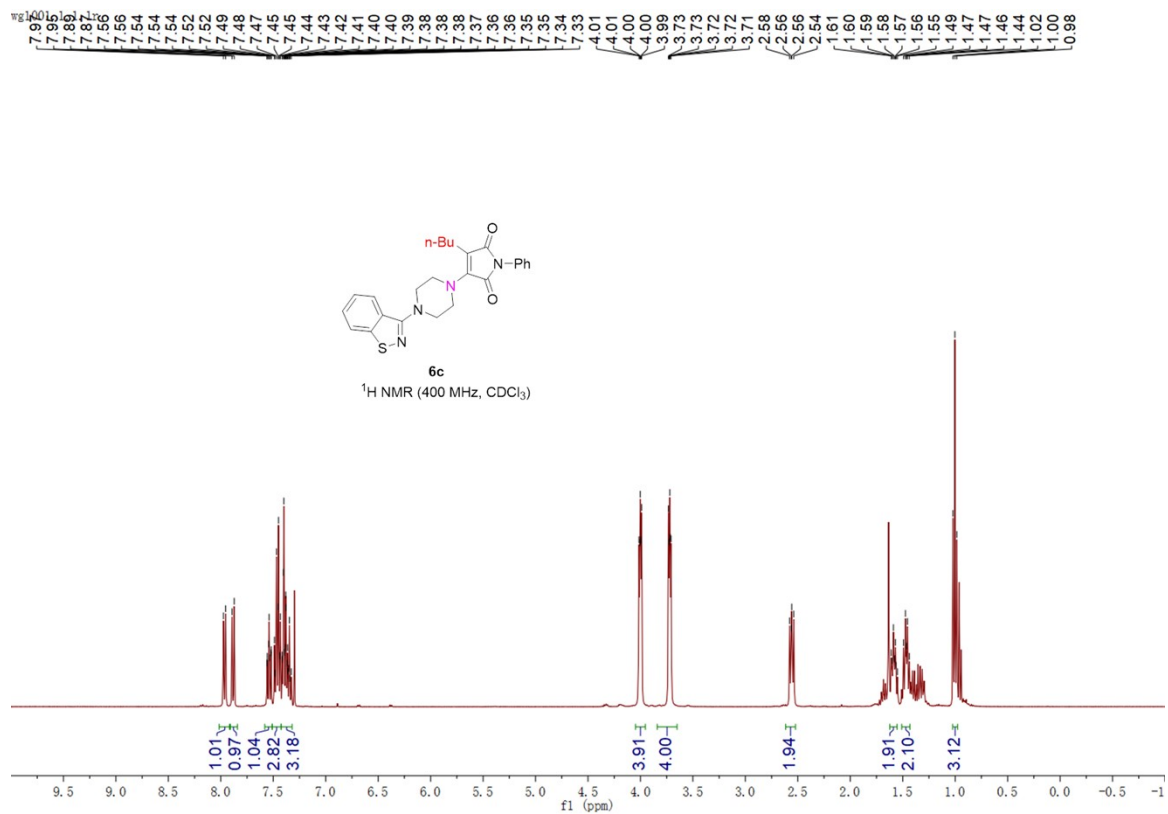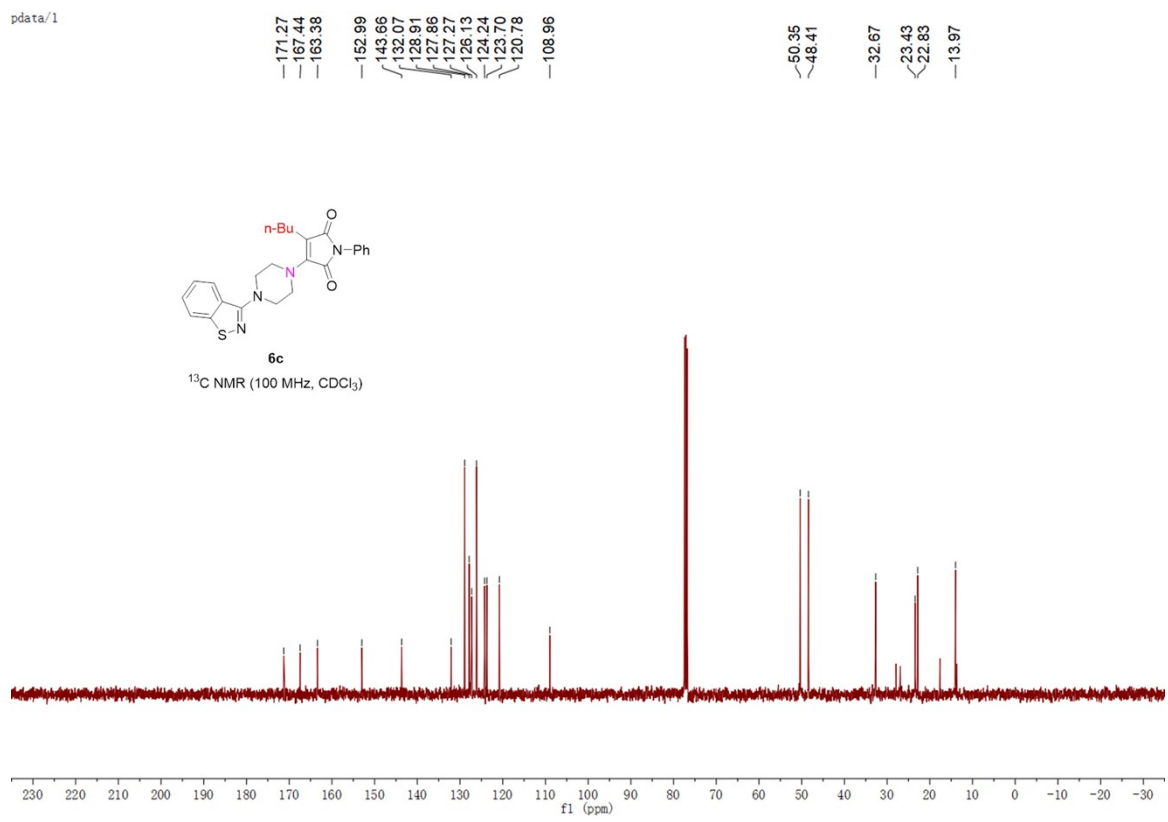

# HRMS of Products

176 981

wg20221202-1 12 (0.259) AM2 (Ar,20000.0,0.00,0.00); Cm(12-6x1.500)

1: TOF MSES+  
4.45e5

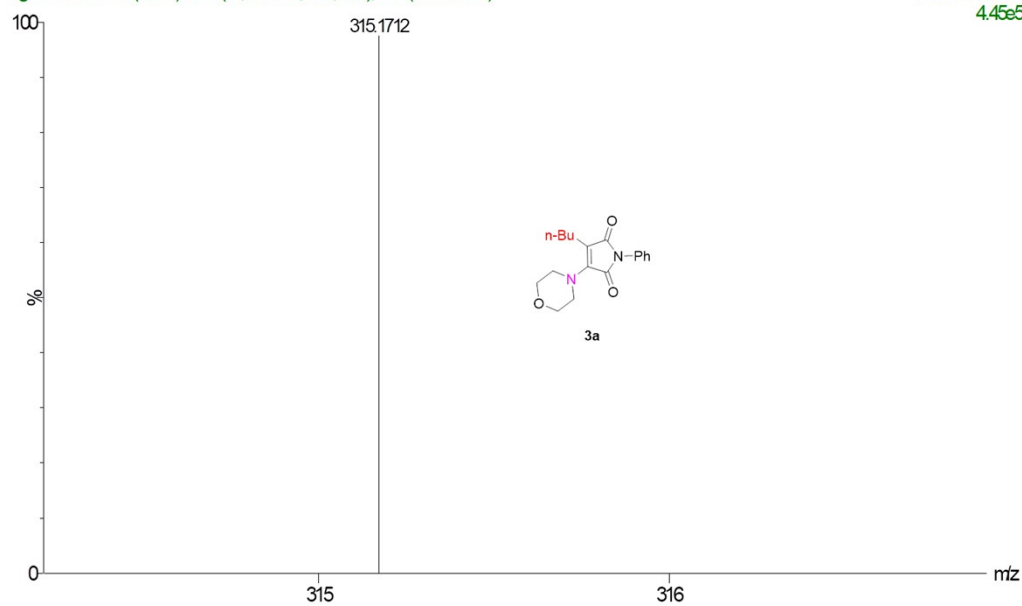

176 981

wg20221202-1 73 (1.449) AM2 (Ar,20000.0,0.00,0.00); Cm(73-5x1.500)

1: TOF MSES+  
1.21e7

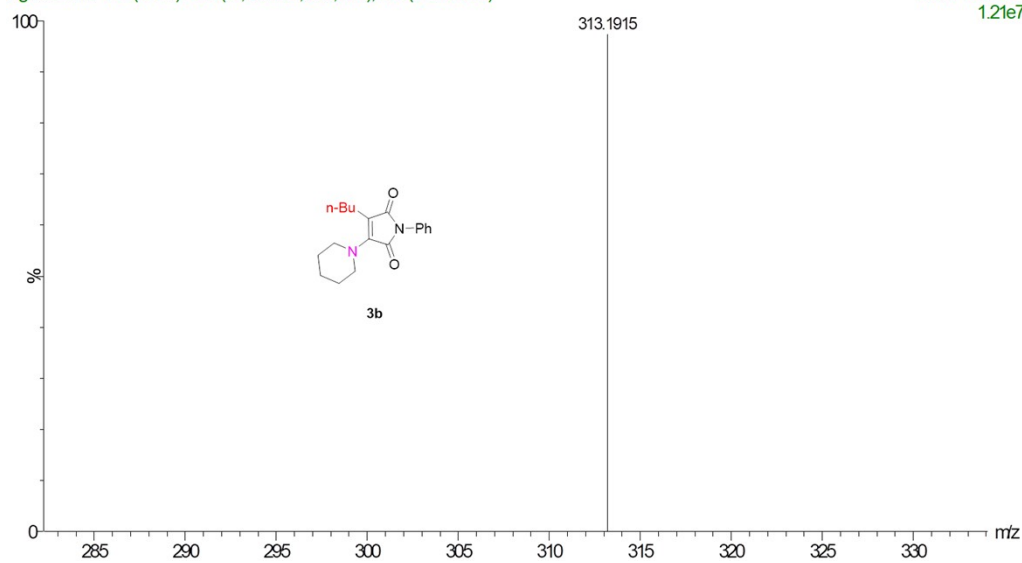

986 987

wg20221209-2 31 (0.620) AM2 (Ar,20000,0,0,00,0.00); Cm(31-5x1.500)

1: TOF MS ES+  
1.26e6

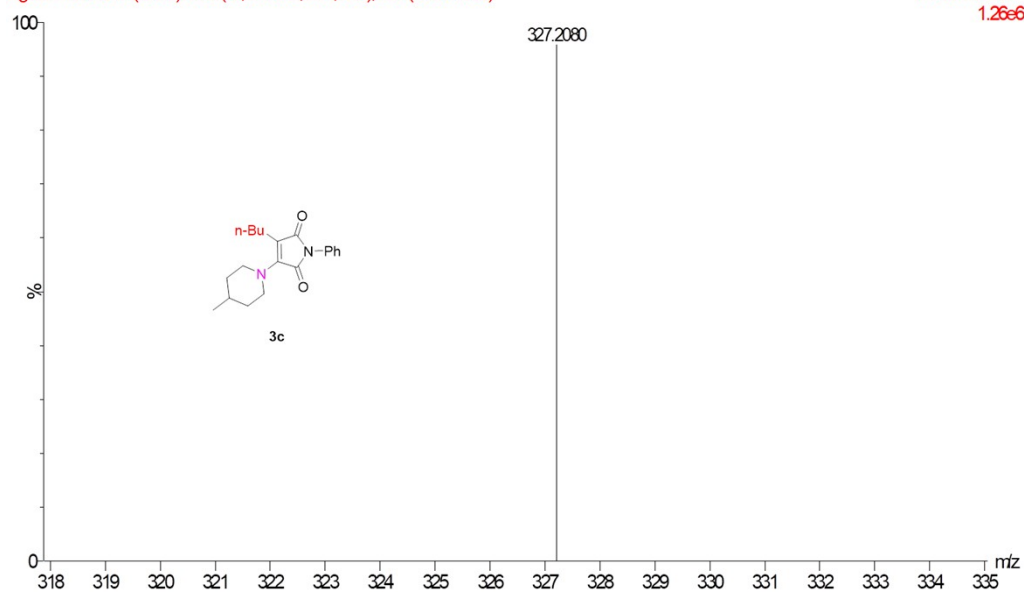

986 987

wg20221209-2 31 (0.620) AM2 (Ar,20000,0,0,00,0.00); Cm(31-5x1.500)

1: TOF MS ES+  
1.42e6

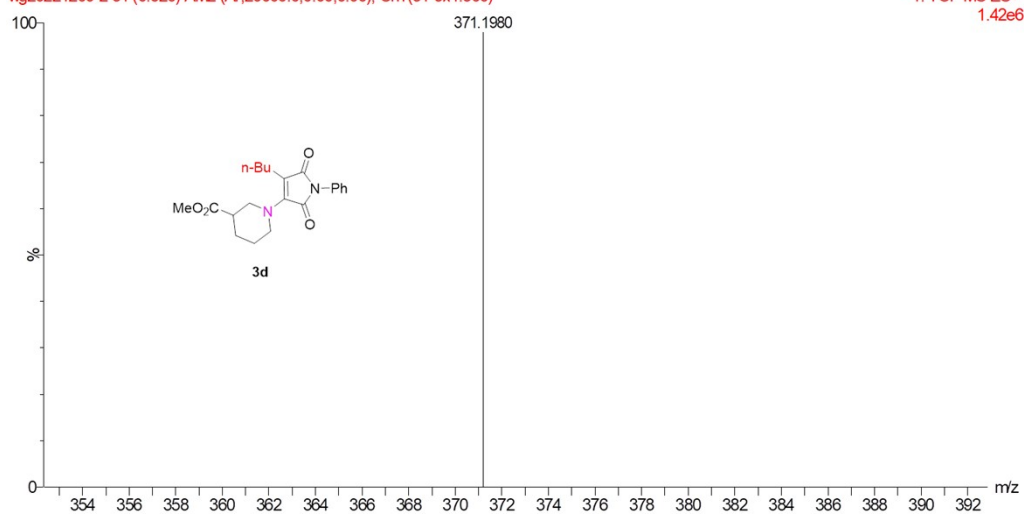

996 995

wg20221202-3 75 (1.483) AM2 (Ar,20000.0,0.00,0.00); Cm(75-4x1.500)

1: TOF MS ES+  
2.58e6

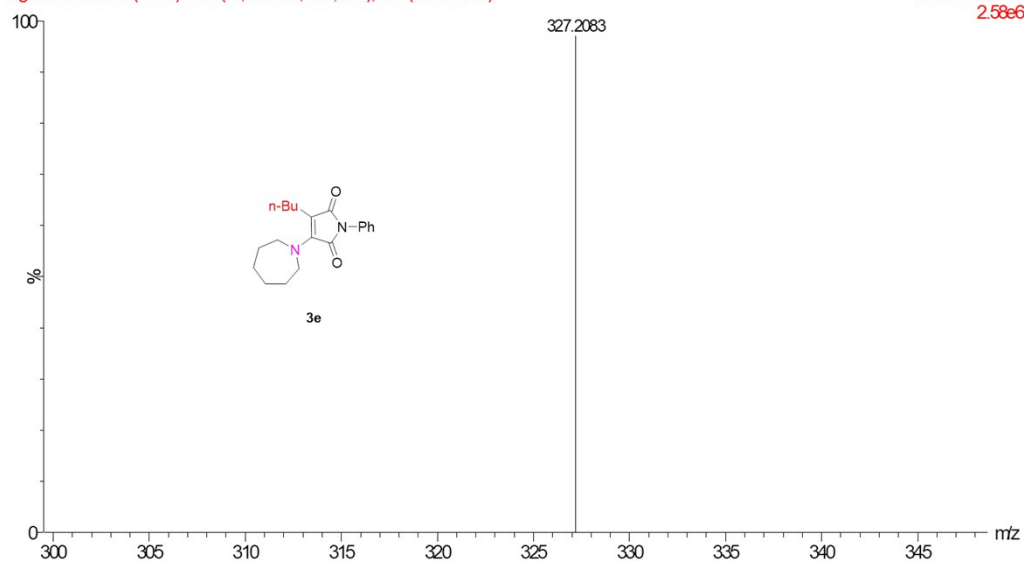

996 995

wg20221202-3 75 (1.483) AM2 (Ar,20000.0,0.00,0.00); Cm(75-4x1.500)

1: TOF MS ES+  
1.92e6

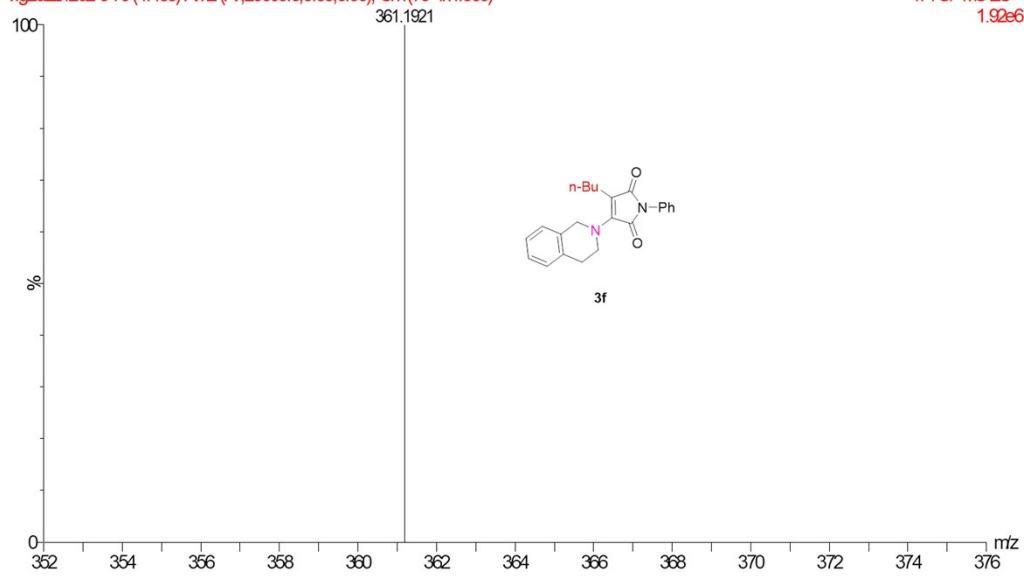

1002\_967

wg20221202-4 49 (0.984) AM2 (Ar,20000,0,0,00,0.00); Cm(49-5x1.500)

1: TOF MS ES+  
2.03e6

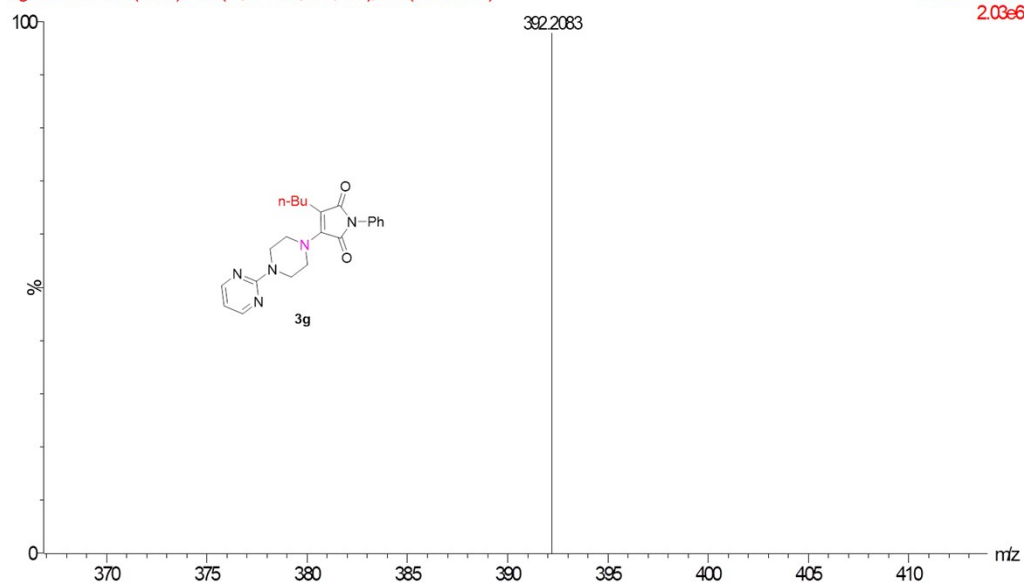

1002\_967

wg20221202-4 49 (0.984) AM2 (Ar,20000,0,0,00,0.00); Cm(49-5x1.500)

1: TOF MS ES+  
9.72e5

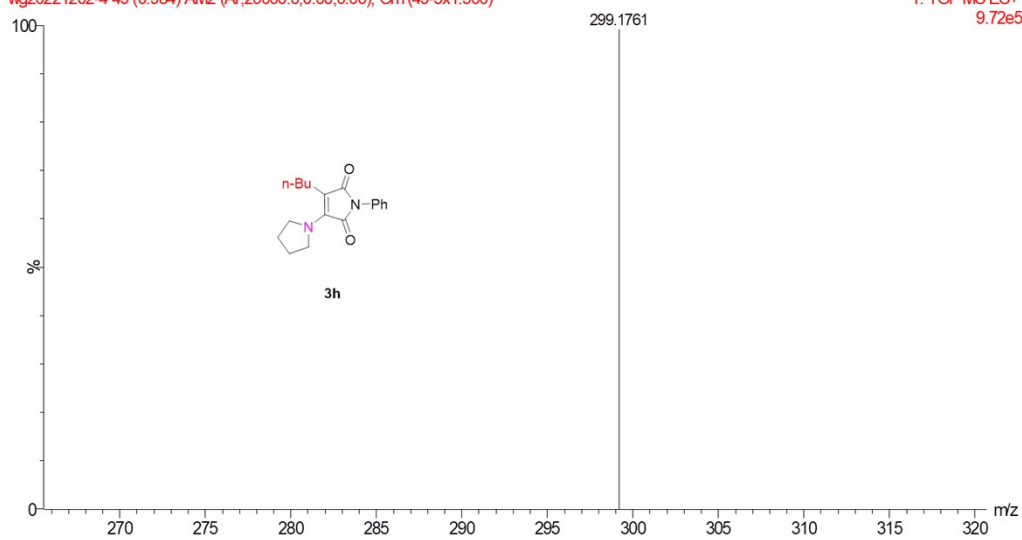

1007 999

wg20221202-5 46 (0.913) AM2 (Ar,20000.0,0.00,0.00); Cm (46-4x1.500)

1: TOF MS ES+  
8.19e5

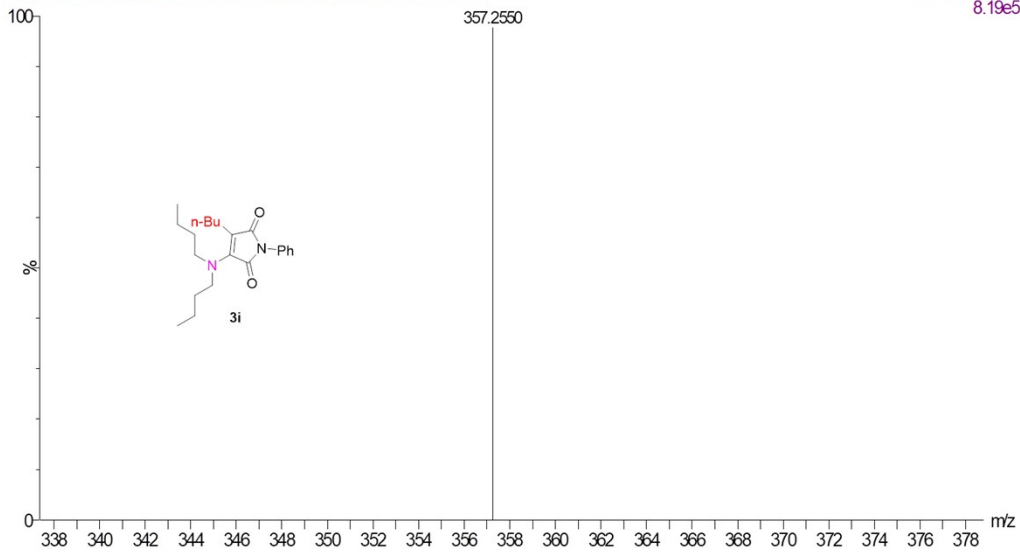

1007 999

wg20221202-5 46 (0.913) AM2 (Ar,20000.0,0.00,0.00); Cm (46-4x1.500)

1: TOF MS ES+  
4.18e5

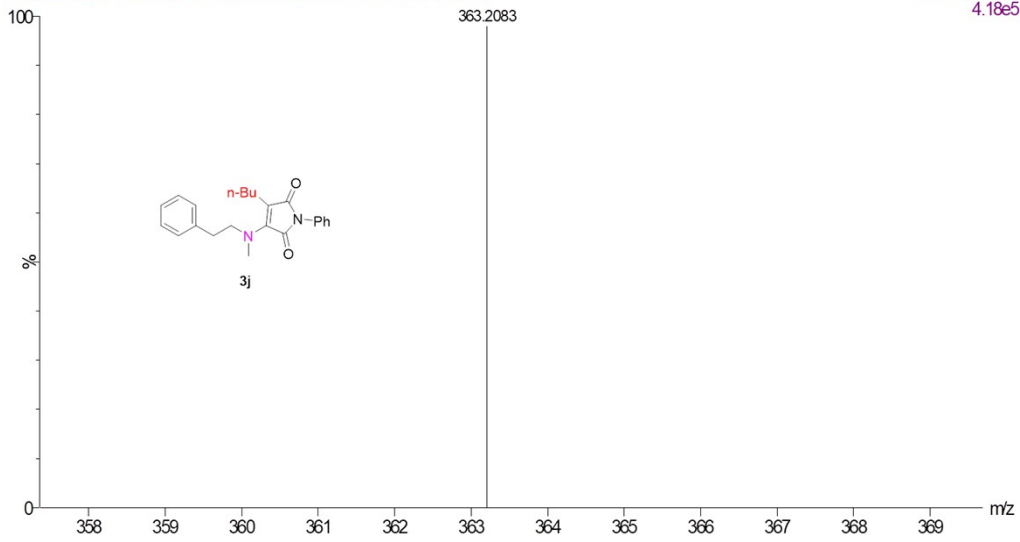

1000 1126

wg20221202-6 60 (1.190) AM2 (Ar,20000.0,0.00,0.00); Cm(60-5x1.500)

1: TOF MS ES+  
1.79e6

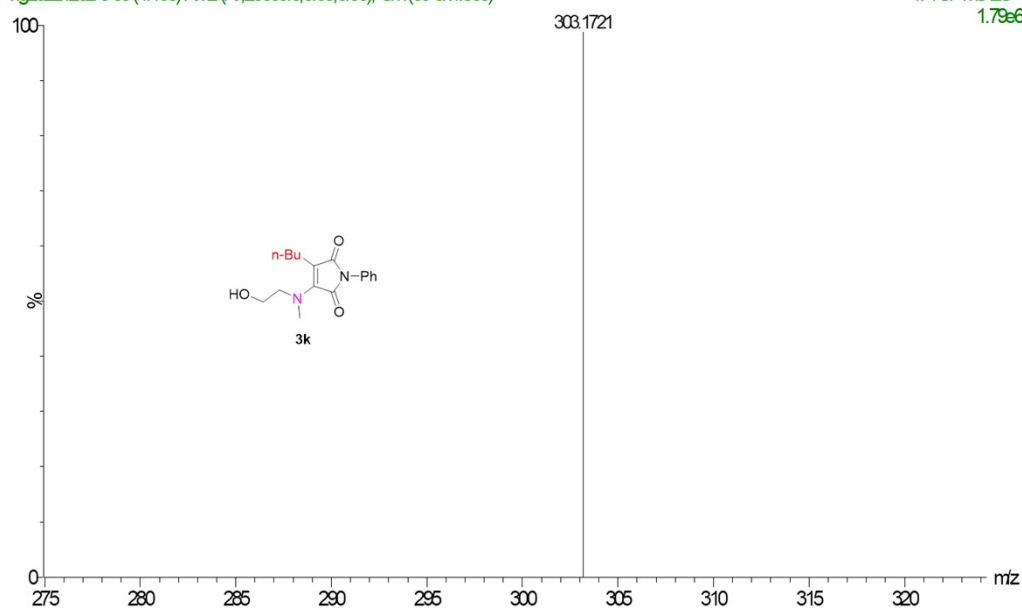

1000 1126

wg20221202-6 60 (1.190) AM2 (Ar,20000.0,0.00,0.00); Cm(60-5x1.500)

1: TOF MS ES+  
2.26e6

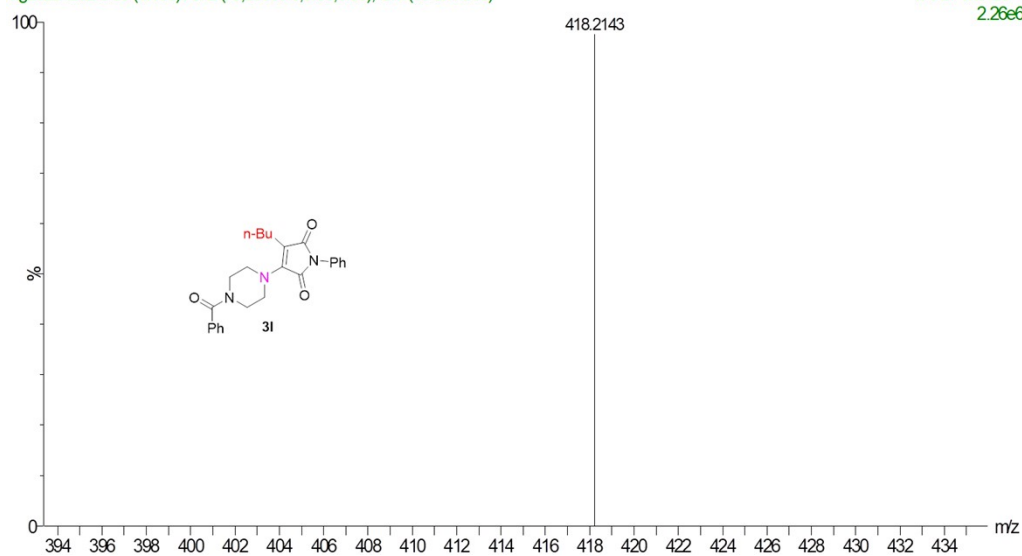



937 959

wg20221202-7 75 (1.483) AM2 (Ar,20000.0,0.00,0.00); Cm(75-5x1.500)

1: TOF MS ES+  
1.26e6

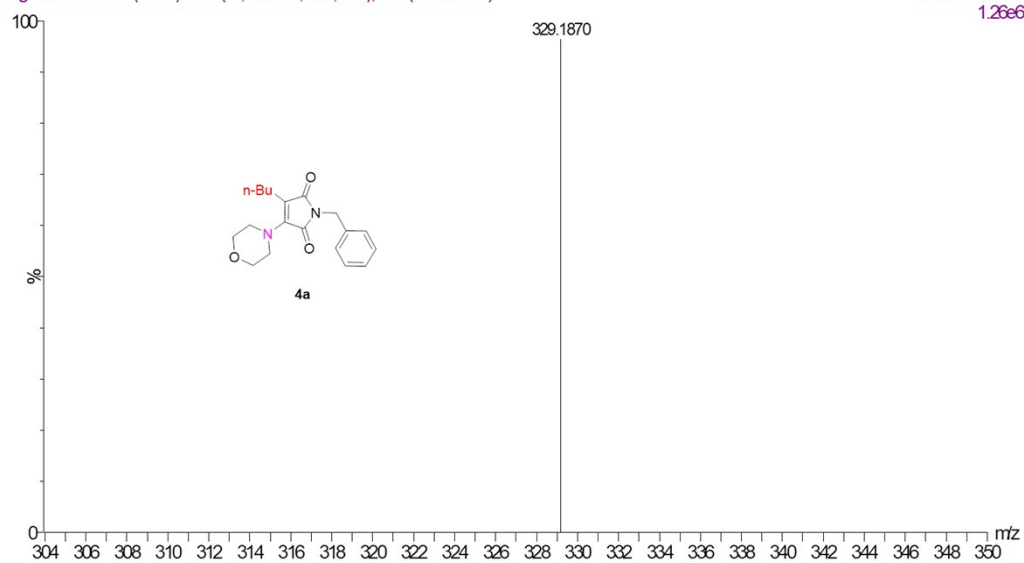

937 959

wg20221202-7 75 (1.483) AM2 (Ar,20000.0,0.00,0.00); Cm(75-5x1.500)

1: TOF MS ES+  
5.36e5

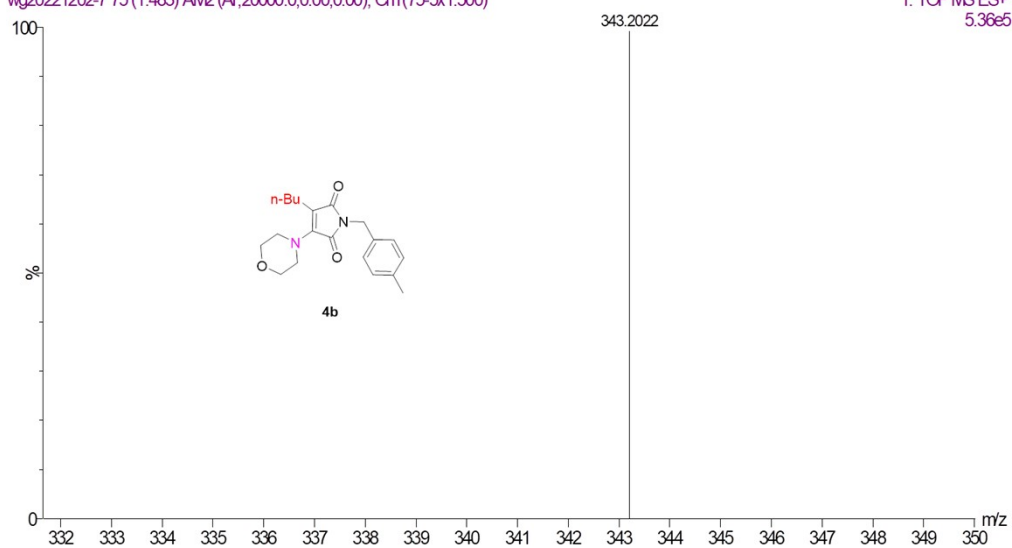

949 950

wg20221202-8 74 (1.467) AM2 (Ar,20000,0,0.00,0.00); Cm(74-7x1.500)

1: TOF MS ES+  
4.83e5

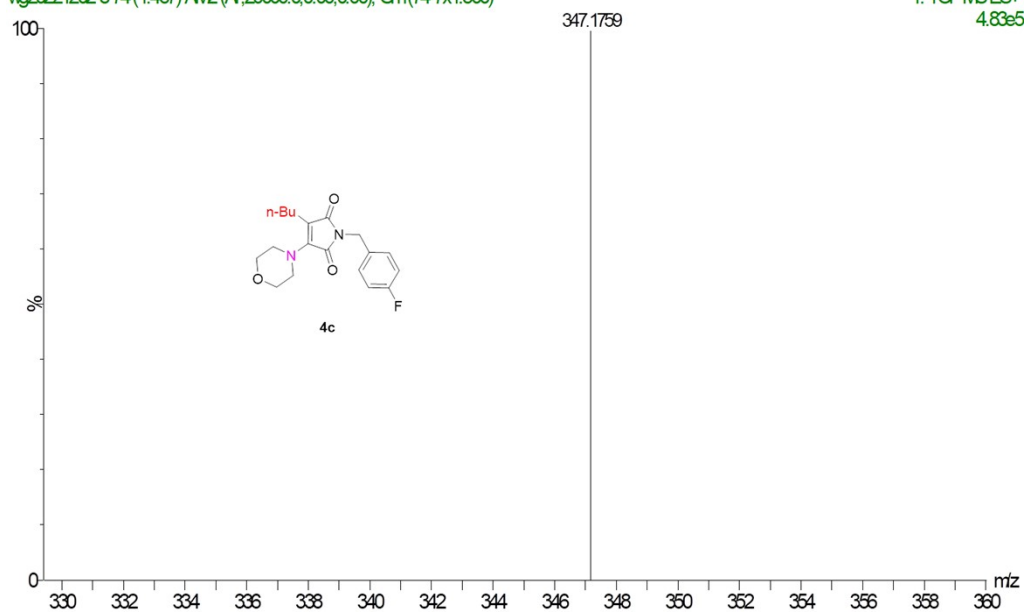

949 950

wg20221202-8 74 (1.467) AM2 (Ar,20000,0,0.00,0.00); Cm(74-6x1.500)

1: TOF MS ES+  
4.36e5

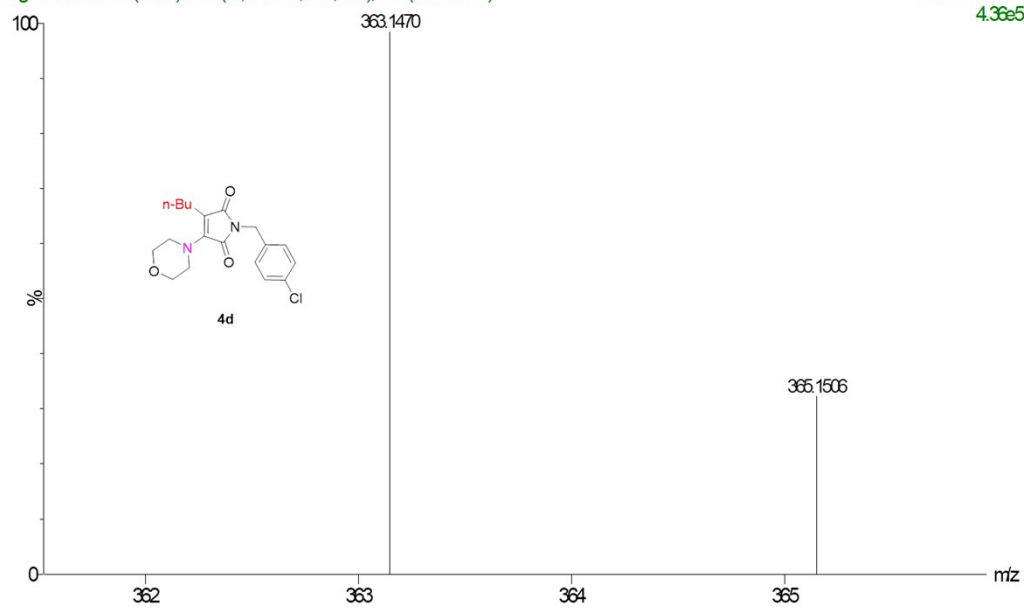

964 956

wg20221202-974 (1.466) AM2 (Ar,20000,0,0,0,0,0); Cm(74-6x1.500)

1: TOF MS/ES+  
2.29e5

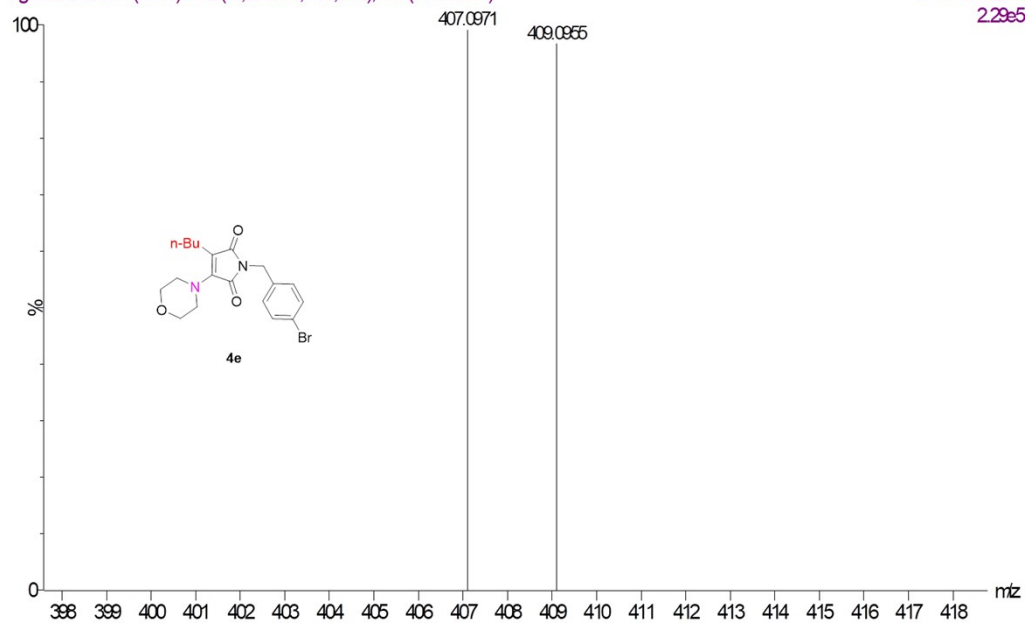

964 956

wg20221202-974 (1.466) AM2 (Ar,20000,0,0,0,0,0); Cm(74-6x1.500)

1: TOF MS/ES+  
1.26e5

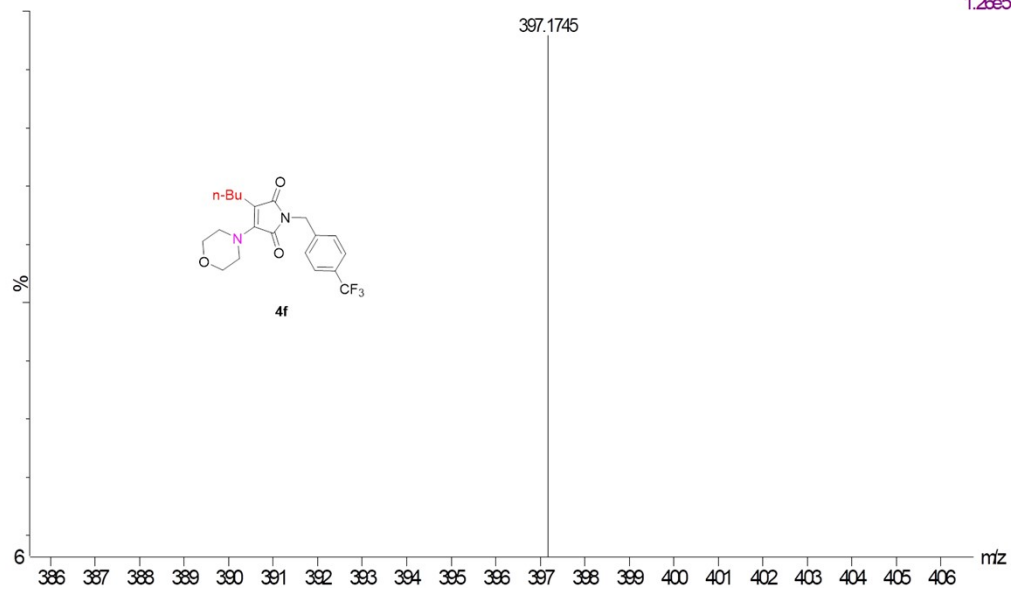

963 958

wg20221209-10 37 (0.741) AM2 (Ar,20000.0,0.00,0.00); Cm(37-6x1.500)

1: TOF MSES+  
1.86e5

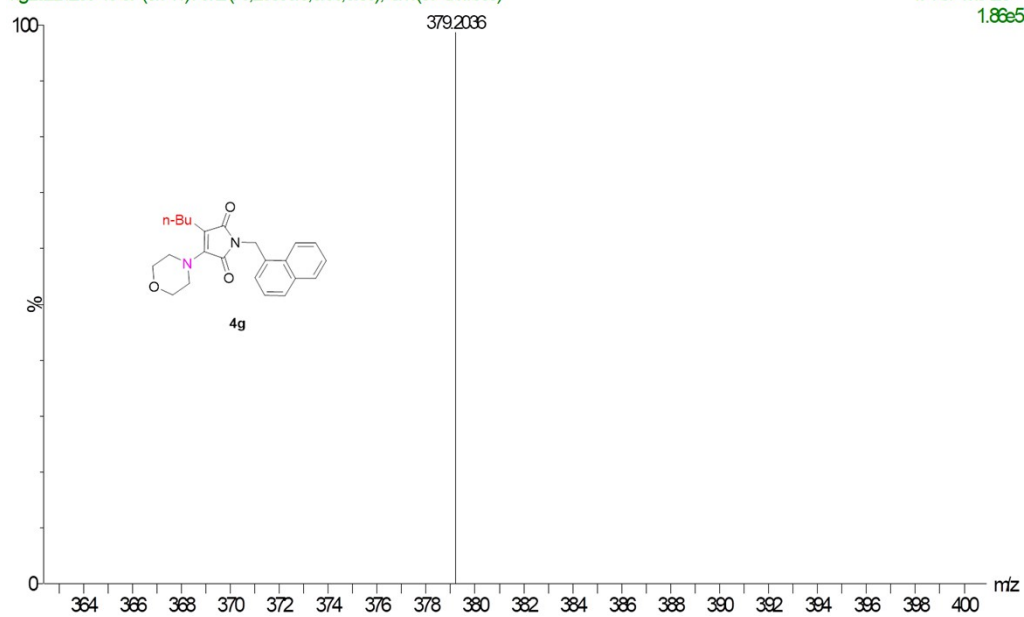

963 958

wg20221209-10 37 (0.741) AM2 (Ar,20000.0,0.00,0.00); Cm(37-6x1.500)

1: TOF MSES+  
9.93e4

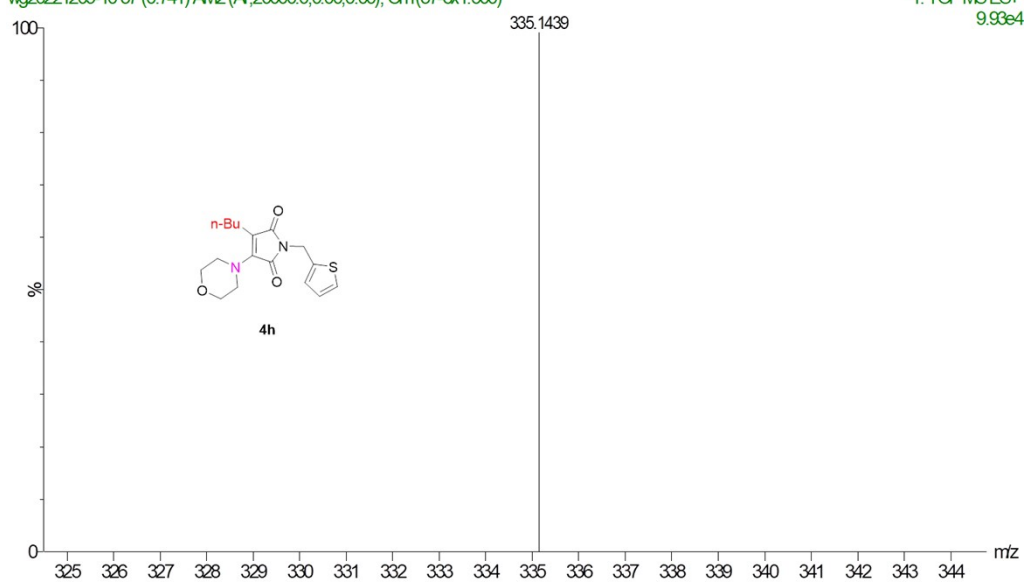

940 962

wg20221209-11 20 (0.414) AM2 (Ar,20000.0,0.00,0.00); Cm(20-5x1.500)

1: TOF MS ES+  
2.20e4

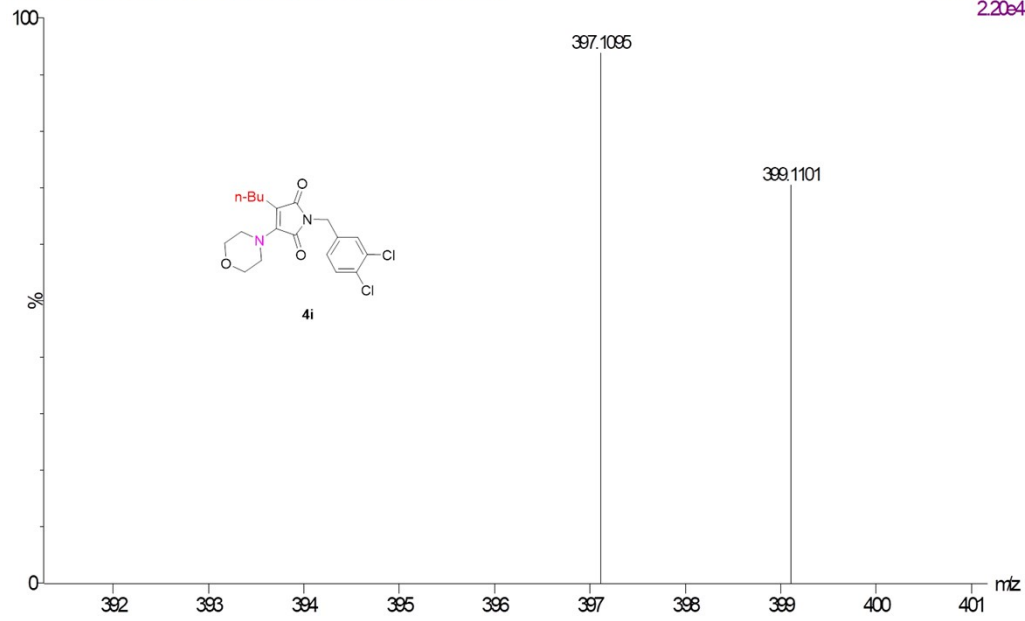

940 962

wg20221209-11 26 (0.535) AM2 (Ar,20000.0,0.00,0.00); Cm(26-4x1.500)

1: TOF MS ES+  
2.05e5

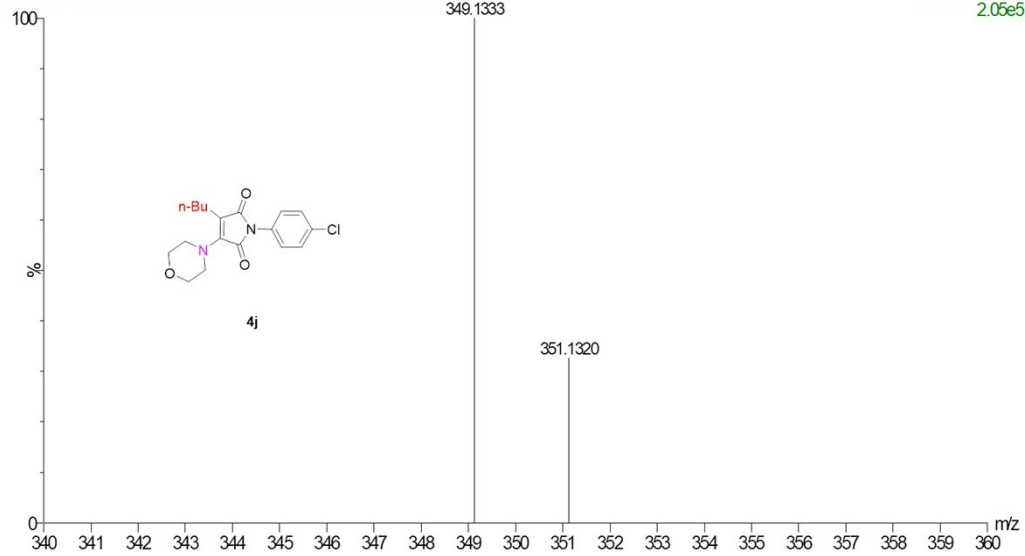

1121 1125

wg20221209-12 34 (0.691) AM (Cen,5, 25.00, Ar,10000.0,0.00,0.00); Cm(34-7x1.500)

1: TOF MS ES+  
1.32e5

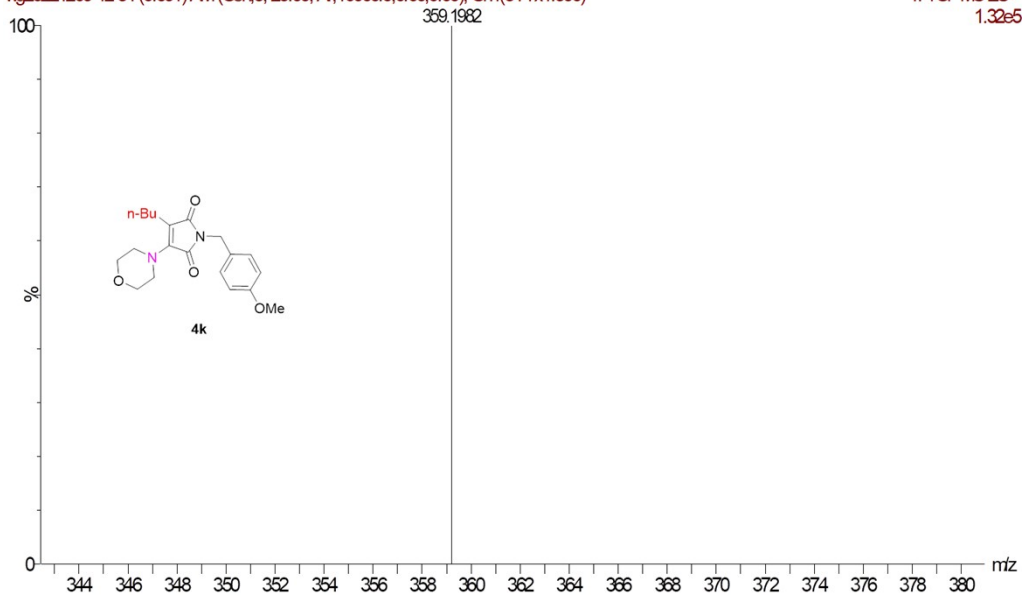

1121 1125

wg20221209-12 15 (0.310) AM2 (Ar,20000.0,0.00,0.00); Cm(15-5x1.500)

1: TOF MS ES+  
9.70e5

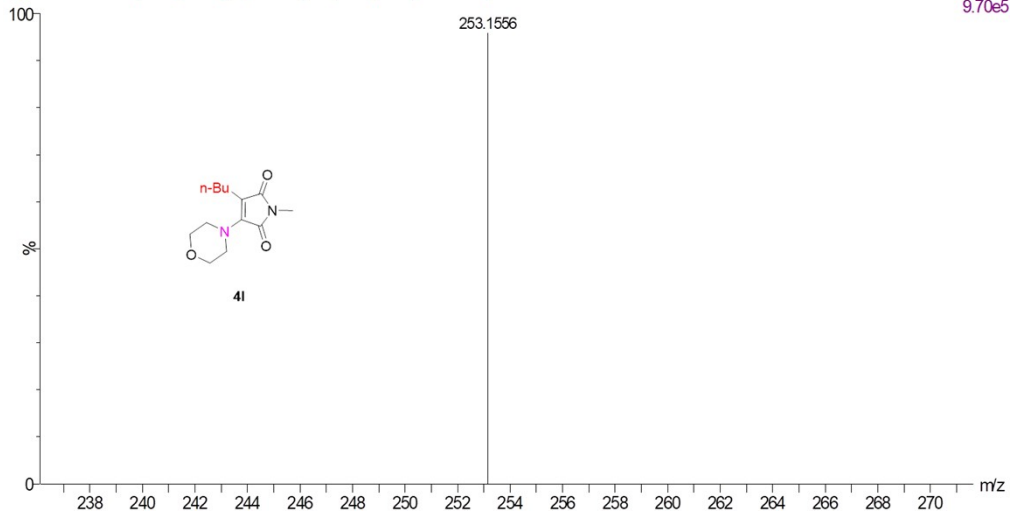

1029 1068

wg20221209-13 55 (1.065) AM(Top,5, Ar, 10000.0,0.00,0.00); Cm(55-7x1.500)

1: TCFMSES+  
6.60e4

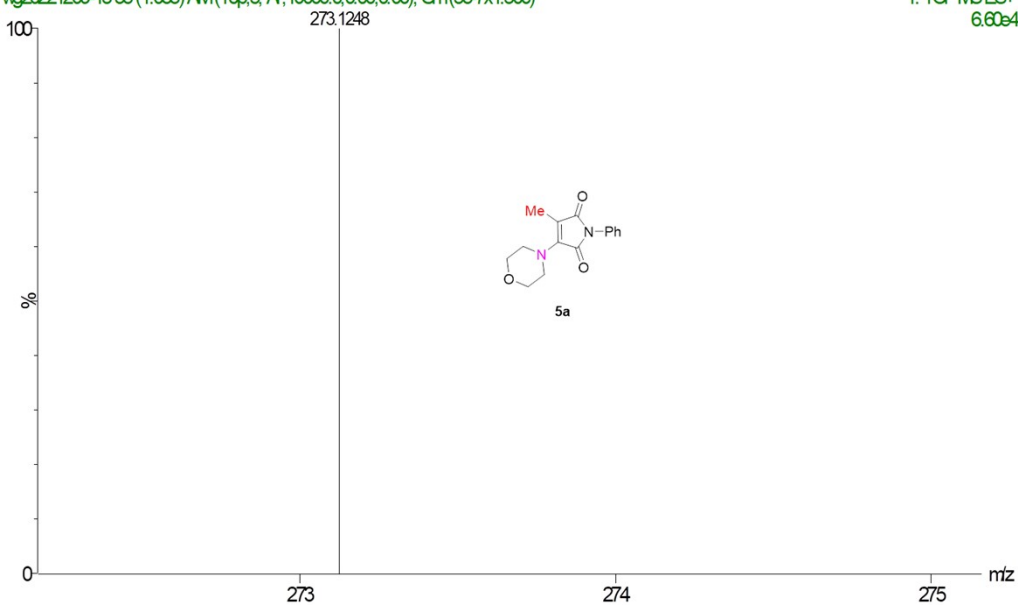

1029 1068

wg20221209-13 50 (1.001) AM2 (Ar,20000.0,0.00,0.00); Cm(50-7x1.500)

1: TCFMSES+  
8.96e5

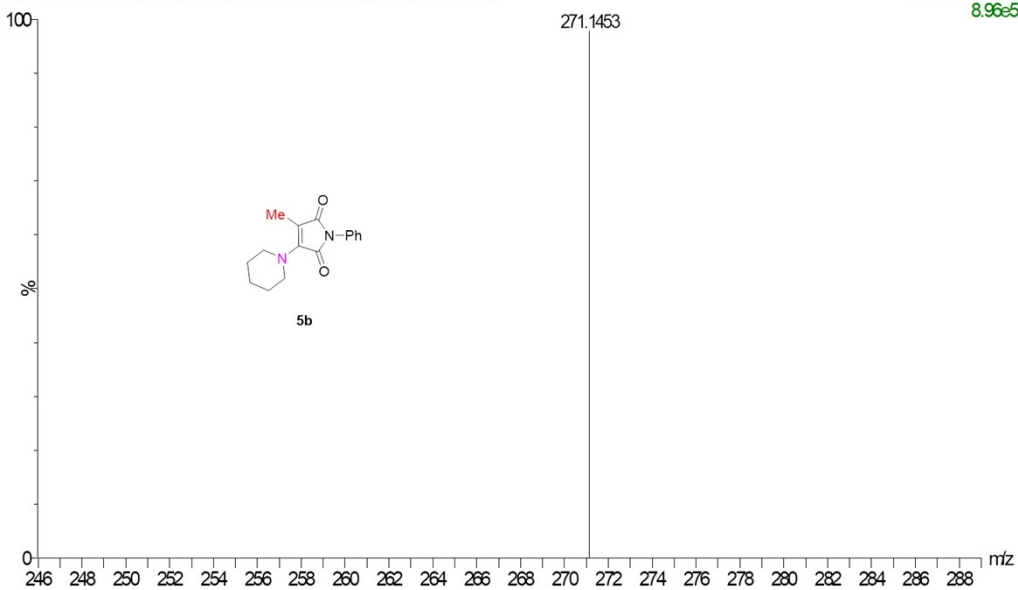

1070 1074

vg20221202-14.69 (1.361) AM2 (Ar,20000,0,0,0,0,0); Cm(69-7x1.500)

1: TCFMSES+  
1.55e6

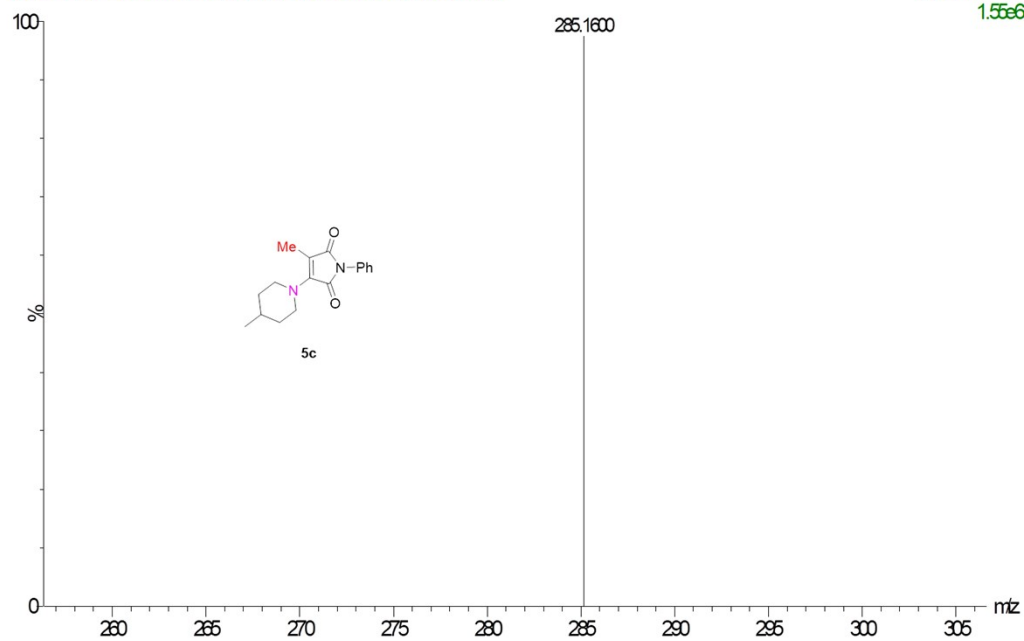

1070 1074

vg20221202-14.69 (1.361) AM2 (Ar,20000,0,0,0,0,0); Cm(69-7x1.500)

1: TCFMSES+  
1.22e6

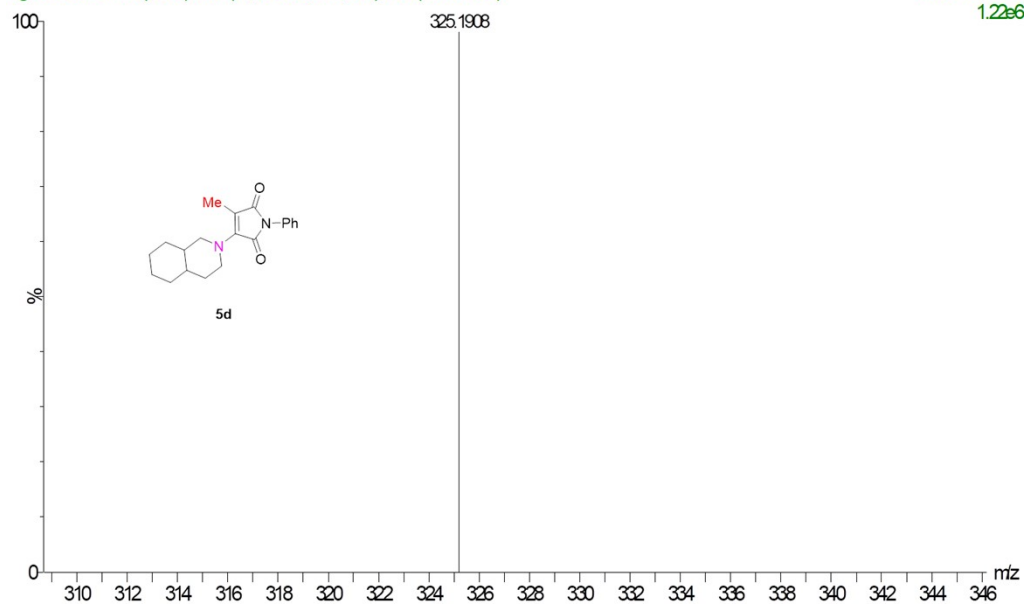



1075 1076

vg20221202-1568 (1.344) AM2 (Ar,20000,0,0,00,0,00); Cm(68-6x1.500)

1: TOF MS ES+  
1.54e6

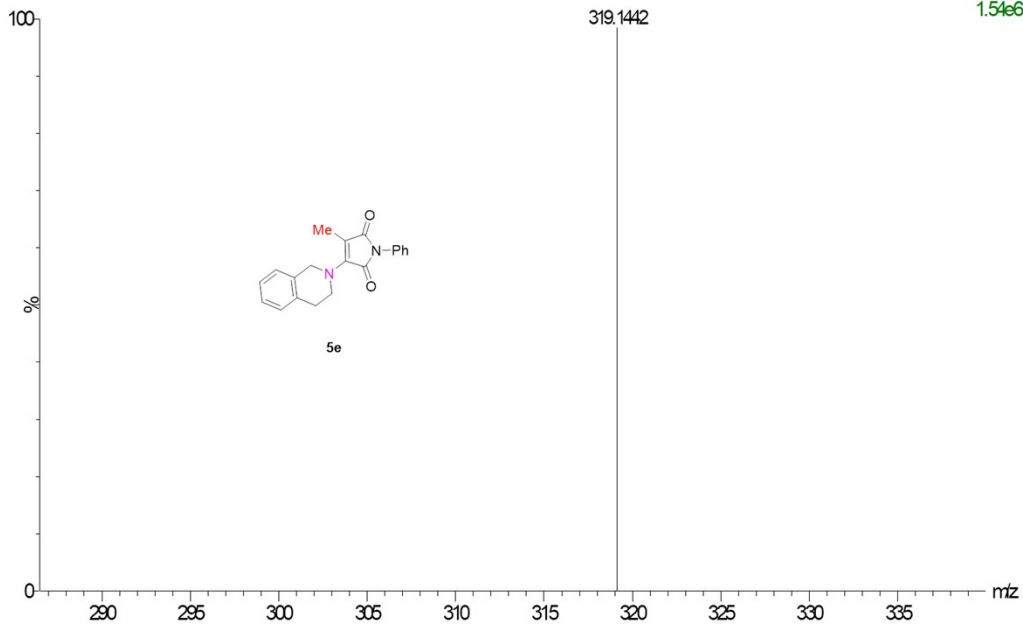

1075 1076

vg20221202-1568 (1.344) AM2 (Ar,20000,0,0,00,0,00); Cm(68-6x1.500)

1: TOF MS ES+  
6.12e5

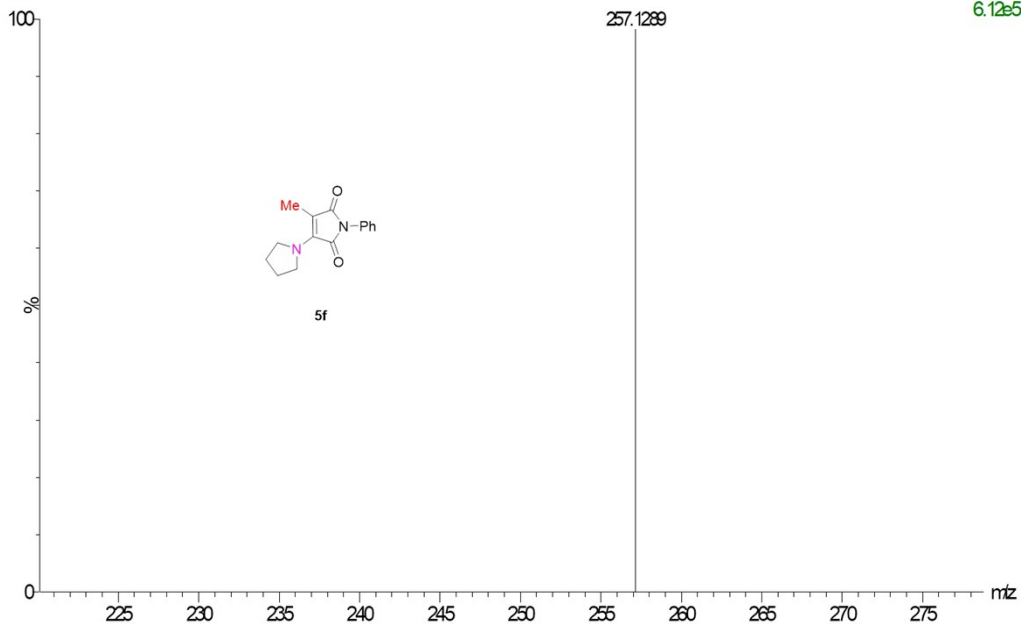

1072 1071

vg20221209-16 15 (0.310) AM2 (Ar,20000,0,0,00,0,00); Cm(15-6x1.500)

1: TCFMSES+  
3.48e6

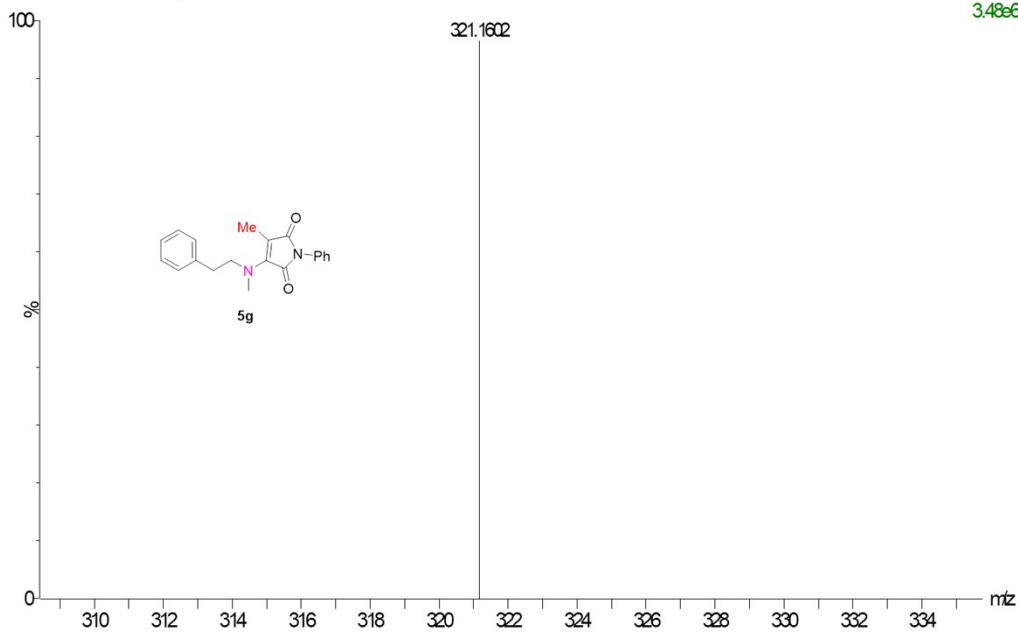

1072 1071

vg20221209-16 15 (0.310) AM2 (Ar,20000,0,0,00,0,00); Cm(15-6x1.500)

1: TCFMSES+  
2.35e6

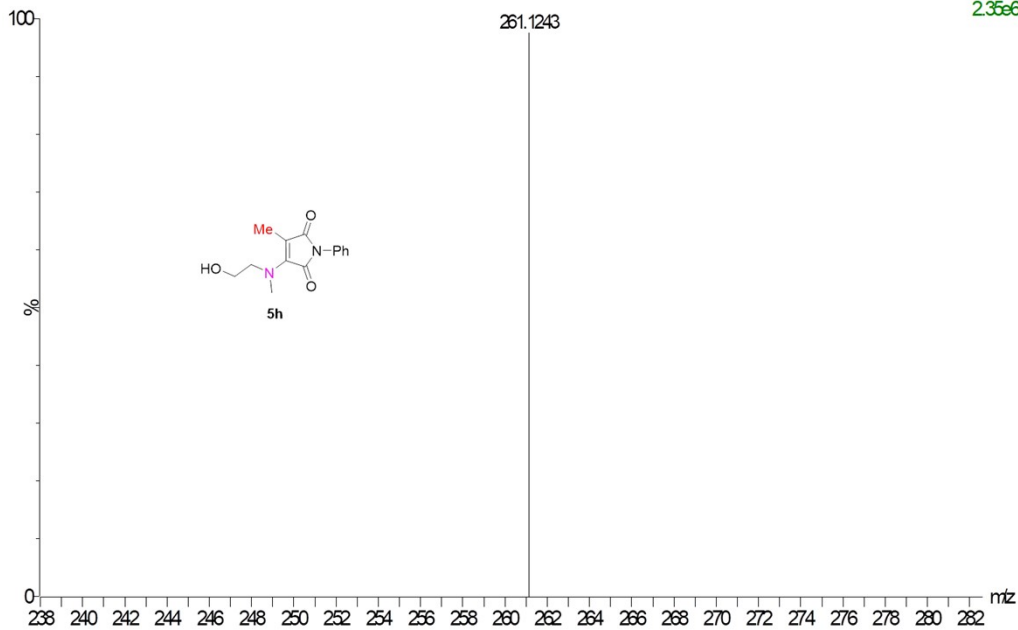

1008 1017

wg20221202-17 56 (1.102) AM2 (Ar,20000,0,0,0,0,0); Cm(56-6x1.500)

1: TCMSES+  
1.23e5

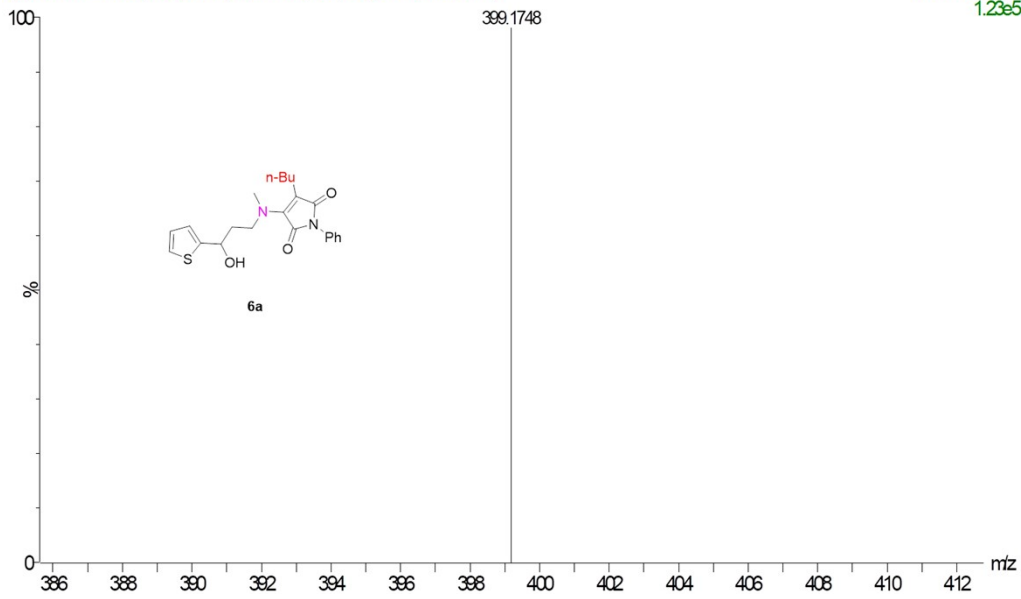

1008 1017

wg20221202-17 76 (1.500) AM2 (Ar,20000,0,0,0,0,0); Cm(76-4x1.500)

1: TCMSES+  
1.45e6

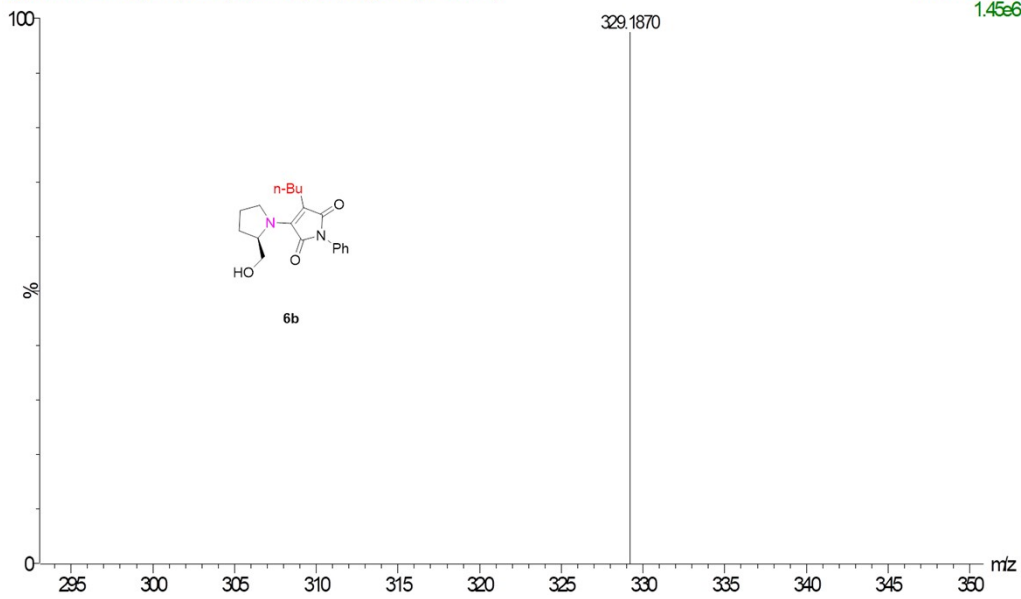

1001 zxy1

vg20221209-18 15 (0.310) AM2 (Ar, 20000, 0, 0, 0, 0, 0); Cm(15-6x1.500)

1: TCFMSES+  
1.65e6

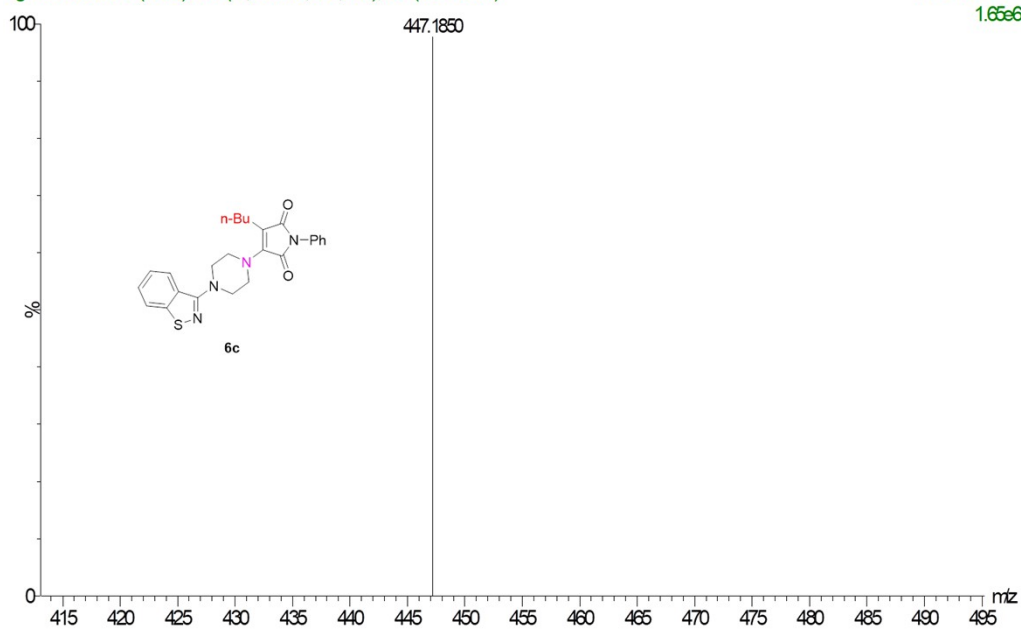

Supplement: d3ob00889d1.pdf [file d3ob00889d1.pdf]
